# Supplementary material for: Impact of Australia's introduction of tobacco plain packs on adult smokers’ pack-related perceptions and responses: results from a continuous tracking survey
Source: PubMed Central journal article supplement — BMJ Open. 2014 Dec 18;4(12):e005836. doi: 10.1136/bmjopen-2014-005836 (PMC4275762; doi:10.1136/bmjopen-2014-005836), 2014-12-18
Supplement: bmjopen-2014-005836.draft_revisions.pdf [file bmjopen-2014-005836.draft_revisions.pdf]

# BMJ Open

## Impact of Australia's introduction of tobacco plain packs on adult smokers' pack-related perceptions and responses: Results from a continuous tracking survey

|                                 |                                                                                                                                                                                                                                                                                                                                                                                                                          |
|---------------------------------|--------------------------------------------------------------------------------------------------------------------------------------------------------------------------------------------------------------------------------------------------------------------------------------------------------------------------------------------------------------------------------------------------------------------------|
| Journal:                        | <i>BMJ Open</i>                                                                                                                                                                                                                                                                                                                                                                                                          |
| Manuscript ID:                  | bmjopen-2014-005836                                                                                                                                                                                                                                                                                                                                                                                                      |
| Article Type:                   | Research                                                                                                                                                                                                                                                                                                                                                                                                                 |
| Date Submitted by the Author:   | 02-Jun-2014                                                                                                                                                                                                                                                                                                                                                                                                              |
| Complete List of Authors:       | Dunlop, Sally; Cancer Institute NSW, Cancer Screening and Prevention<br>Dobbins, Timothy; Australian National University,<br>Young, Jane; University of Sydney, Cancer Epidemiology and Services<br>Research (CESR); Sydney South West Area Health Service, Surgical<br>Outcomes Research Centre (SOuRCe)<br>Perez, Donna; Cancer Institute NSW, Cancer Screening and Prevention<br>Currow, David; Cancer Institute NSW, |
| <b>Primary Subject Heading</b>: | Smoking and tobacco                                                                                                                                                                                                                                                                                                                                                                                                      |
| Secondary Subject Heading:      | Public health, Health policy, Evidence based practice                                                                                                                                                                                                                                                                                                                                                                    |
| Keywords:                       | Health policy < HEALTH SERVICES ADMINISTRATION & MANAGEMENT,<br>PUBLIC HEALTH, PREVENTIVE MEDICINE                                                                                                                                                                                                                                                                                                                       |
|                                 |                                                                                                                                                                                                                                                                                                                                                                                                                          |

SCHOLARONE™  
Manuscripts

1  
2  
3 **Impact of Australia's introduction of tobacco plain packs on adult smokers' pack-**  
4 **related perceptions and responses: Results from a continuous tracking survey**  
5  
6  
7

8  
9 Sally M Dunlop, Timothy Dobbins, Jane M Young, Donna Perez, David C Currow  
10  
11

12  
13  
14  
15  
16 **Dr Sally Dunlop**  
17

18 Cancer Institute New South Wales, Australian Technology Park, Level 9, 8 Central Avenue,  
19  
20 Eveleigh New South Wales, 2015, Australia  
21  
22 Senior Research Officer, Cancer Screening and Prevention  
23  
24  
25

26  
27 **Dr Timothy Dobbins**  
28

29 Australian National University, Canberra, ACT, 0200, Australia  
30  
31 Research Fellow, National Centre for Epidemiology and Population Health  
32  
33  
34

35  
36 **Prof Jane M Young**  
37

38 Sydney School of Public Health, Queen Elizabeth II Research Institute (D02), University of  
39  
40 Sydney, New South Wales, 2006, Australia  
41  
42 Professor in Cancer Epidemiology, Cancer Epidemiology and Services Research  
43  
44  
45

46  
47 **Ms Donna Perez**  
48

49 Cancer Institute New South Wales, Australian Technology Park, Level 9, 8 Central Avenue,  
50  
51 Eveleigh New South Wales, 2015, Australia  
52  
53 Research and Evaluation Coordinator, Cancer Screening and Prevention  
54  
55  
56

1  
2  
3 **Prof David C Currow**

4  
5 Cancer Institute New South Wales, Australian Technology Park, Level 9, 8 Central Avenue,

6  
7 Eveleigh New South Wales, 2015, Australia

8  
9 Chief Executive Officer and Chief Cancer Officer

10  
11  
12  
13  
14 **Correspondence to:** Sally Dunlop [sally.dunlop@cancerinstitute.org.au](mailto:sally.dunlop@cancerinstitute.org.au)

15  
16  
17  
18  
19  
20  
21  
22  
23  
24  
25  
26  
27  
28  
29  
30  
31  
32  
33  
34  
35  
36  
37  
38  
39  
40  
41  
42  
43  
44  
45  
46  
47  
48  
49  
50  
51  
52  
53  
54  
55  
56  
57  
58  
59  
60

For peer review only

**ABSTRACT**

**Objectives** – To investigate the impact of Australia’s plain tobacco packaging policy on two stated purposes of the legislation – increasing the impact of health warnings and decreasing the promotional appeal of packaging – among adult smokers.

**Design** – Serial cross-sectional study with weekly telephone surveys (April 2006 to May 2013). Interrupted time-series analyses using ARIMA modelling and logistic regression analyses were used to investigate intervention effects.

**Participants** – 15,745 adult smokers (aged 18 years and over) in New South Wales (NSW), Australia. Random selection of participants involved recruiting households using random digit dialling and selecting the *n*th oldest smoker for interview.

**Intervention** – The introduction of the legislation on 1<sup>st</sup> October 2012.

**Outcomes** – Salience of tobacco pack health warnings, cognitive and emotional responses to warnings, avoidance of health warnings, perceptions regarding one’s cigarette pack.

**Results** – Adjusting for background trends, seasonality, anti-smoking advertising activity, and cigarette costliness, results from ARIMA modelling showed that, two to three months after the introduction of the new packs, there was a significant increase in the proportion of smokers having strong cognitive (9.8% increase,  $p=0.005$ ), emotional (8.6% increase,  $p=0.01$ ), and avoidant (9.8% increase,  $p=0.0005$ ) responses to on-pack health warnings. Similarly, there was a significant increase in the proportion of smokers strongly disagreeing that the look of their cigarette pack is attractive (57.5% increase,  $p<0.0001$ ), says something good about them (54.5% increase,  $p<0.0001$ ), influences the brand they buy (40.6% increase,  $p<0.0001$ ), makes their pack stand out (55.6% increase,  $p<0.0001$ ), is fashionable (44.7% increase,  $p<0.0001$ ), and matches their style (48.1% increase,  $p<0.0001$ ). Changes in these outcomes were maintained six months post-intervention.

**Conclusions** – The introductory effects of the plain packaging legislation among adult smokers are consistent with the specific objectives of the legislation in regards to reducing promotional appeal and increasing effectiveness of health warnings.

## ARTICLE SUMMARY

### Article Focus

- Experimental research has shown that plain tobacco packaging can: reduce the appeal of tobacco products to consumers; increase the effectiveness of health warnings; and reduce the ability of packaging to mislead consumers about the harmful effects of smoking.
- Given that the introduction of the tobacco plain packaging legislation in Australia is the first of its kind, no research to date has investigated the impact of plain packaging on these outcomes in a real-world context with mandated plain packs.

### Key Findings

- The introductory effects of the new packs observed in this study are consistent with the specific objectives and expected effects of the plain packaging legislation.
- This is the first study to date to demonstrate an impact of the Australian plain tobacco packs on the salience and impact of on-pack health warnings and negative perceptions about tobacco packs among adult smokers.

### Strengths and Limitations

- Limitations of the study include the use of landline-only telephone numbers and a somewhat low response rate, possibly leading to some bias in sample composition. However, both of these sampling issues were consistent across the study period, limiting their influence on the observed pattern of results.
- Study strengths are: the use of population-level data collected over a long time period, with a large sample of adult smokers; the use of a time-series approach with multiple data points before the intervention; and the inclusion of important time-related and sample-related potential covariates.

1  
2  
3  
4 On the 1<sup>st</sup> of December 2012, Australia became the first country to introduce mandatory plain  
5  
6 packaging for all tobacco products.<sup>1</sup> The new plain packs are olive green cardboard packages  
7  
8 devoid of all brand design elements, with brand name and quantity written in a standardised  
9  
10 font and location on each pack. The new packs continue to carry coloured graphic health  
11  
12 warnings covering 90% of the back of packs, with the warnings on the front of pack enlarged  
13  
14 from 30% to 75%. Manufacturers were required to produce the new packs from the 1<sup>st</sup> of  
15  
16 October 2012 and they started appearing for sale from that date; approximately 80% of  
17  
18 smokers were using plain packs by mid-November.<sup>2</sup>  
19  
20  
21  
22  
23

24 The plain packaging legislation aims to discourage people from taking up smoking,  
25  
26 encourage smokers to give up smoking, and discourage relapse.<sup>1</sup> The stated purpose of the  
27  
28 legislation is to regulate the packaging and appearance of tobacco products in order to: (a)  
29  
30 reduce the appeal of tobacco products to consumers, (b) increase the effectiveness of health  
31  
32 warnings, and (c) reduce the ability of packaging to mislead consumers about the harmful  
33  
34 effects of smoking. As this was the first time any such legislation had been implemented, the  
35  
36 expected outcomes of the new packs were informed by a body of research consisting  
37  
38 primarily of experimental studies, summarised in recent reviews.<sup>3-6</sup>  
39  
40  
41  
42  
43

44 Studies in which participants were presented with mocked-up plain and branded tobacco  
45  
46 packs show that plain packaging has the potential to reduce the promotional appeal of a pack,  
47  
48 diminish positive perceptions about smokers of cigarettes from that pack, and reduce the  
49  
50 appeal of smoking in general.<sup>7-13</sup> Such studies also suggest that health warnings are both  
51  
52 more noticeable and more effective when presented on plain rather than branded packs,<sup>14, 15</sup>  
53  
54 with researchers suggesting that brand imagery diffuses the impact of health warnings.<sup>16</sup>  
55  
56

57 These results have been corroborated in naturalistic studies in which smokers are assigned to  
58  
59  
60

1  
2  
3 smoke their normal cigarettes from either plain or branded packs for a period of time, with  
4  
5 plain pack smokers reporting increased negative perceptions about to their pack and smoking,  
6  
7 along with an increased impact of health warnings.<sup>17, 18</sup> A limitation of these previous studies,  
8  
9 however, is the inability to differentiate the impact of plain packaging and the novelty impact  
10  
11 of a pack which is simply different to the packs that smokers are used to seeing. No studies to  
12  
13 date have been able to investigate the impact of plain tobacco packaging on tobacco pack  
14  
15 appeal and the salience and effects of health warnings in the context of mandatory plain  
16  
17 packaging, when all packs with which smokers are in contact are devoid of any branding  
18  
19 other than a name in a standard font.  
20  
21  
22  
23  
24

25 In the current study, we use cross-sectional survey data collected weekly for a period of seven  
26  
27 years to investigate the impact of the new packaging on adult smokers' responses to the  
28  
29 health warnings on their packs and perceptions of their packs. It was hypothesised that, after  
30  
31 the introduction of the new packs, smokers would find the health warnings more salient,  
32  
33 would have an increased response to the warnings, and would hold less favourable  
34  
35 perceptions of their packs. The continuous nature of the data allowed us to track how these  
36  
37 outcomes changed after the introduction of the new packs, investigating whether any  
38  
39 observed changes were sustained in the six months following their introduction. This  
40  
41 approach builds on our previous study evaluating the impact of the introduction of the plain  
42  
43 packaging legislation on calls to a smoking cessation helpline.<sup>19</sup> Additionally, given that  
44  
45 responses to graphic pack warnings had been tracked since their initial introduction in 2006,  
46  
47 we were able to assess changes in these responses in the context of longer-term trends.  
48  
49  
50  
51  
52  
53  
54  
55

## 56 **METHOD**

57  
58  
59  
60

### Study Design and Participants

The Cancer Institute's Tobacco Tracking Survey (CITTS) is a serial cross-sectional telephone survey with approximately 50 interviews conducted per week throughout the year. The CITTS monitors smoking-related cognitions and behaviours among adult smokers and recent quitters (quit in last 12 months) in New South Wales (NSW), Australia's most populous state. Households are recruited using random digit dialling (landline telephone numbers only) and a random selection procedure is used to recruit participants within households (selecting the *n*th oldest eligible adult). Analyses for this study are limited to smokers interviewed between April 2006 and May 2013 (total *n* = 15,745), with an average response rate of 40% (American Association for Public Opinion Research Response Rate #4).<sup>20</sup> The CITTS is approved by the NSW Population Health Services Research Ethics Committee (HREC/10/CIPHS/13). The study was funded by the Cancer Institute NSW.

### Outcome Measures

Following the introduction of the original graphic health warnings on tobacco packs in March 2006, questions were included in CITTS relating to smokers' responses to the warnings. These questions assessed cognitive response to the warnings ('the graphic warnings encourage me to stop smoking') and emotional response ('with the graphic warnings, each time I get a cigarette out I worry that I shouldn't be smoking'). From April 2007, warning avoidance was also assessed ('they make me feel that I should hide or cover my packet from the view of others'). From October 2011, the salience of the warnings was also assessed ('the only thing I notice on my cigarette pack is the graphic warnings'). All answers were given on a 5-point Likert scale (strongly disagree-strongly agree). Due to distributions of the data, responses were collapsed into a binary variable indicating strong agreement vs. other.



1  
2  
3 From October 2011 smokers were asked a battery of questions relating to their perceptions of  
4 their packs: 'The look of my cigarette pack...' (i) is attractive; (ii) says something good about  
5 me to other smokers; (iii) influences the brand I buy; (iv) makes my brand stand out from  
6 other brands; (v) is fashionable; and (vi) matches my style (1=strongly disagree-5=strongly  
7 agree). Responses were dichotomized into strongly disagree vs. other. Changes in each of  
8 these individual items in relation to the introduction of the new tobacco packs were explored,  
9 and for the purpose of analysis, we also constructed a variable indicating strong negative  
10 pack perceptions (strong disagreement with all of the statements vs. not).  
11  
12  
13  
14  
15  
16  
17  
18  
19  
20  
21  
22

### 23 **Covariates**

24 Data on sex, age, total household income, and educational attainment (low=less than high  
25 school; moderate=high school diploma or vocational college; high=tertiary), were included in  
26 CITTS. Socio-economic status (SES) was indicated by a variable that combined responses to  
27 household income and educational attainment.<sup>21, 22</sup> High SES was defined as having a  
28 household income of more than AUD\$80,000 (and any education level), or an income of  
29 AUD\$40-80,000 and moderate-high education. Moderate SES was defined as either an  
30 income below AUD\$40,000 and high education, or an income of AUD\$40-80,000 and  
31 moderate education. Low SES was defined as either an income below AUD\$40,000 and low  
32 or moderate education, or an income AUD\$40-80,000 and low education. Those with missing  
33 data on one variable were classified based on the other.  
34  
35  
36  
37  
38  
39  
40  
41  
42  
43  
44  
45  
46  
47  
48

49 Average number of cigarettes smoked per day was used to indicate heaviness of smoking  
50 (light=less than 10 cigarettes per day; moderate=11-20 cigarettes per day; heavy=more than  
51 20 cigarettes per day). As smokers' responses to graphic health warnings and perceptions of  
52 their cigarette packs might conceivably be related to their quitting experiences or propensity  
53  
54  
55  
56  
57  
58  
59  
60

1  
2  
3 towards quitting, we also included previous quit attempts as a control variable (0=never tried  
4  
5 to quit; 1=tried to quit at least once).  
6  
7

8  
9  
10 Along with demographic and smoking characteristics, respondents' pack perceptions and  
11  
12 responses to health warnings might also possibly be influenced by the timing of their  
13  
14 interview in terms of variations in anti-smoking advertising activity, changes in the costliness  
15  
16 of cigarettes, or shifting social norms.  
17  
18

19  
20  
21 Respondents' level of exposure to anti-smoking advertising in the three months prior to their  
22  
23 interview was measured in terms of Target Audience Ratings Points (TARPs). TARPs are a  
24  
25 product of the percentage of the target audience exposed to an advertisement (reach) and the  
26  
27 average number of times a target audience member would be exposed (frequency). Hence,  
28  
29 200 TARPs might represent 100% of the target audience receiving the message an average of  
30  
31 two times over a specified period, or 50% reached four times. Exposure to advertising over a  
32  
33 3-month period was chosen based on previous research suggesting that advertising effects  
34  
35 occur within this time frame.<sup>22, 23</sup> We ascertained TARPs for each of the advertisements  
36  
37 broadcast in NSW during the study period based on OZTAM Australian TV Audience  
38  
39 Measurements for adults aged 18years and older for free-to-air and cable TV ( $M=1590$ ,  
40  
41  $SD=758$ ).<sup>24</sup>  
42  
43  
44  
45

46  
47 A variable indicating cigarette costliness<sup>25</sup> at time of interview was calculated as the ratio of  
48  
49 the average quarterly recommended retail pack price of the 2 top-selling Australian cigarette  
50  
51 brands (obtained from the retail trade magazine *Australian Retail Tobacconist*, volumes 65 to  
52  
53 87) to the average weekly earnings in the same quarter ( $M=1.54$ ,  $SD=0.17$ ).<sup>26</sup>  
54  
55  
56  
57  
58  
59  
60

1  
2  
3 The influence of changing social norms was accounted for by statistically accounting for a  
4  
5 time-based trend in the data.  
6  
7

### 8 9 **Statistical analyses**

10  
11 Two approaches to statistical analysis were used to assess the impact of the new packaging  
12  
13 on each outcome. The first approach used interrupted time series analysis, in which data  
14  
15 collected at multiple instances over time before and after an intervention is used to detect  
16  
17 whether the intervention has an effect significantly greater than the underlying secular trend.  
18  
19 The advantages of using this approach include the ability to account for background trends,  
20  
21 control for seasonal variations, adjust for auto-correlation in the data (when each value is  
22  
23 correlated with the previous value), and to assess changes in the outcome in the context of  
24  
25 longer-term trends. We also used logistic regression analysis to compare the likelihood of  
26  
27 reporting an outcome for respondents interviewed in the months following the new packaging  
28  
29 legislation and those interviewed before the new packs, controlling for socio-demographic  
30  
31 and smoking characteristics.  
32  
33  
34  
35  
36  
37

38 In the time-series analysis, the weekly data were aggregated at the monthly level (to ensure  
39  
40 sufficient sample size at each time point), providing indications of the proportion of the  
41  
42 sample reporting each outcome. We used autoregressive integrated moving average  
43  
44 (ARIMA) analysis in SAS version 9.3<sup>27</sup> to model the effects of the introduction of the new  
45  
46 packaging on the outcomes of interest, while accounting for background trends, seasonal  
47  
48 variation, the effects of television anti-tobacco advertising, and changes in cigarette  
49  
50 costliness. ARIMA modelling was chosen because the data for each of the outcomes of  
51  
52 interest were auto-correlated.  
53  
54  
55  
56  
57  
58  
59  
60

1  
2  
3 ARIMA modelling comprising model investigation, estimation and diagnostic checking  
4  
5 followed the methods of Box *et al.*<sup>14</sup> This modelling enables investigation of the size and  
6  
7 statistical significance of changes in an outcome after a specified time point, adjusting for  
8  
9 background trends and confounders. An indicator term was created to represent the week of  
10  
11 the introduction of the intervention (the ‘phasing in’ of the new packs on 1 October 2012).  
12  
13 The potential confounders of anti-smoking advertising activity (TARPs) and cigarette  
14  
15 costliness were included in all models. In the models predicting responses to graphic health  
16  
17 warnings, terms indicating the months of December and January were also included to  
18  
19 account for potential for seasonal variations (not included for pack perception outcomes due  
20  
21 to limited data points). Due to the large number of outcomes to be reported, we do not report  
22  
23 the effects of these covariates (available from authors on request).  
24  
25  
26  
27  
28

29  
30 Next, we conducted logistic regression analysis to predict each outcome, using month of  
31  
32 interview as the indicator, focusing on the period of the introduction of the new packs  
33  
34 (August 2012 – May 2013). The months preceding and following the intervention were  
35  
36 represented by a five-level term: (a) the two months preceding the change (August-  
37  
38 September, ‘pre-plain packs (PP)’); (b) the two months of ‘phase-in’ (October-November);  
39  
40 (c) the two months ‘immediate post-PP’ (December-January); (d) ‘3-4 months post-PP’  
41  
42 (February-March); and (e) ‘5-6 months post-PP’ (April-May). Demographic and smoking  
43  
44 characteristics were included as covariates, along with recent anti-smoking advertising  
45  
46 activity. Because changes in cigarette costliness were based on quarterly data, there was a  
47  
48 high degree of multi-collinearity between costliness and time of interview (VIF=26),  
49  
50 resulting in inflated standard errors and unstable estimates of regression coefficients. We  
51  
52 therefore did not to include cigarette costliness as a covariate in these regression models. To  
53  
54 provide a point of comparison, these models were also fitted to 2011-2012 data for the same  
55  
56  
57  
58  
59  
60

1  
2  
3 months. Logistic regression analyses were conducted using Stata v11.<sup>28</sup> Weights were applied  
4  
5 in all analyses (using svy commands with ‘p’ weights) to adjust for a slight over-  
6  
7 representation of females, older respondents, and regional residents compared to the NSW  
8  
9 population.<sup>29</sup>  
10

## 11 12 13 **RESULTS**

14  
15 Sample characteristics are shown in Table 1.  
16  
17

### 18 19 20 **Responses to graphic health warnings**

21  
22 Figure 1 shows the monthly proportions of the smoker sample strongly agreeing with each of  
23  
24 the graphic health warning responses over time. In general, responses to the warnings had  
25  
26 been decreasing since their introduction in 2006. Of smokers interviewed in 2006: 21%  
27  
28 reported strong cognitive responses to the warnings, decreasing to 12% in 2011; and 20%  
29  
30 reported strong emotional responses to the warnings, decreasing to 12% in 2011.  
31  
32

33  
34  
35  
36 The results of the interrupted time series analyses investigating the impact of the new  
37  
38 packaging on responses to graphic health warnings are shown in Table 2. For all models, the  
39  
40 residuals were uncorrelated and normally distributed, and all other model diagnostics  
41  
42 indicated suitable model fit. After controlling for background trends, seasonality, anti-  
43  
44 smoking advertising activity and cigarette costliness, there was a significant increase in the  
45  
46 proportion of smokers having strong cognitive, emotional and avoidant responses to graphic  
47  
48 warnings after the introduction of the new packs. The increase in the avoidant response  
49  
50 occurred two months after the new packs were introduced, and the increase in cognitive and  
51  
52 emotional responses occurred after three months. In the time-series analysis, the change in  
53  
54  
55  
56  
57  
58  
59  
60

1  
2  
3 the proportion of smokers strongly agreeing that the warnings were the only thing they  
4 noticed on their packs after the introduction of the new packs was not significant.  
5  
6  
7

8  
9  
10 The results of the logistic regression analyses predicting responses to the graphic health  
11 warnings are shown in Table 3. In the pre-PP period (August/September 2012), 10% of  
12 smokers reported a strong cognitive response to the health warnings, this increased  
13 significantly to 18% the immediate post-pp period (December/January), remaining at 19% in  
14 the 5-6 months post-pp period (April/May). There were no significant differences in the  
15 proportion of smokers reporting strong cognitive response over the months of the comparison  
16 period. Increases were observed in the proportions of smokers reporting strong emotional  
17 response (11% to 26% at 1-2 months post-pp), strong avoidant response (10% to 29% at 1-2  
18 months post-pp), and salience of the warnings (12% to 34% at 1-2 months post-pp). The  
19 proportions of smokers reporting these responses remained significantly higher than in the  
20 pre-PP period at 3-4 months and 5-6 months post-PP. There were no significant differences in  
21 any outcome between smokers interviewed pre-PP and those interviewed during the phase-in  
22 period. These effects were independent of any differences between the sample on socio-  
23 demographic or smoking characteristics, as well as anti-smoking advertising activity. There  
24 were no significant differences in any of these outcomes over the months of the comparison  
25 period.  
26  
27  
28  
29  
30  
31  
32  
33  
34  
35  
36  
37  
38  
39  
40  
41  
42  
43  
44  
45  
46

### 47 **Pack perceptions**

48  
49 The monthly proportions of smokers strongly disagreeing with each of the pack attitude items  
50 are shown in Figure 2. The results of the interrupted time series analysis show that, three  
51 months following the introduction of the new packs, there was a significant increase in the  
52 proportion of smokers strongly disagreeing that the look of their cigarette pack is attractive,  
53  
54  
55  
56  
57  
58  
59  
60

1  
2  
3 says something good about them, influences the brand they buy, makes their brand stand out,  
4  
5 is fashionable, and matches their style (Table 2). This effect was independent of any  
6  
7 influence of long-term background trends, cigarette costliness, or anti-smoking advertising  
8  
9 activity.  
10

11  
12  
13  
14 The results from the logistic regression analysis predicting smokers' strong negative pack  
15  
16 perceptions from month of interview are shown in Table 3. The proportion of smokers with a  
17  
18 high score on the negative pack perception index (meaning that they strongly disagreed with  
19  
20 all the statements about their packs) increased from 15% in the pre-PP period to 58% in the  
21  
22 5-6 month post-PP period. Compared to smokers interviewed in the pre-PP period, those  
23  
24 interviewed in the phase-in period, 1-2 months post-PP, 3-4 months post-PP, and 5-6 months  
25  
26 post-PP were significantly more likely to have a high score on the negative pack perception  
27  
28 index. For the comparison period, there were no significant differences in the proportion of  
29  
30 smokers in each month with strong negative perceptions. When the regression analysis was  
31  
32 run separately for each pack perception statement, the same pattern of results emerged.  
33  
34  
35  
36  
37  
38

## 39 **DISCUSSION**

40  
41 To our knowledge, this is the first study to examine the population-level impact of the new  
42  
43 tobacco plain packs on Australian adult smokers' responses to their packs. This is an  
44  
45 important first step in evaluating the policy as these outcomes relate closely to the intended  
46  
47 purpose of the legislation. In the months following the introduction of the new packs, there  
48  
49 was an increase in the proportion of smokers reporting strong cognitive and emotional  
50  
51 responses to the warnings, avoidant behaviours related to the on-pack warnings, and salience  
52  
53 of warnings. There was also an increase in the proportion of smokers with strong negative  
54  
55 perceptions about their packs. These changes were not attributed to variations in exposure to  
56  
57  
58  
59  
60

1  
2  
3 anti-smoking advertising activity, tobacco prices, secular trends, seasonality or changes in  
4  
5 sample composition.  
6  
7

8  
9 Consistent with the results of experimental research,<sup>14, 15, 17</sup> we found that the introduction of  
10 the new packs was associated with an increase in the salience and the self-reported impact of  
11 the health warnings, such that smokers were more likely to report that the warnings are the  
12 only thing they see on their packs, that they feel they should hide or cover their pack, that the  
13 warnings encourage them to stop smoking, and that they make them worry that they  
14 shouldn't be smoking. Prominent graphic health warnings on tobacco products have been  
15 shown to increase health knowledge and perceptions of risk from smoking,<sup>30, 31</sup> reduce  
16 consumption levels and increase cessation behaviour among smokers,<sup>31, 32</sup> and support former  
17 smokers in remaining abstinent.<sup>33</sup> Importantly, the impact of graphic health warnings on  
18 smoking behaviours appears to be a function of the depth of smokers' cognitive processing of  
19 and responses to the warnings (such as those monitored in the current study),<sup>32, 33</sup> suggesting  
20 that if plain packaging can intensify smokers' responses to warnings, flow-on effects on  
21 consumption and quitting are likely.  
22  
23  
24  
25  
26  
27  
28  
29  
30  
31  
32  
33  
34  
35  
36  
37  
38  
39

40 Research shows that the impact of pictorial health warnings declines over time.<sup>31, 34</sup> Of note is  
41 the fact that the introduction of the new packs appears to have reversed a downward trend in  
42 smokers' cognitive and emotional responses to the graphic health warnings that had been  
43 occurring since their initial introduction. On the current plain packaging, the warnings are  
44 having an equal or greater impact on adult smokers than they have since their inception. Due  
45 to the simultaneous introduction of the plain packs and changes in the size and content of the  
46 warnings themselves, the relative contribution of the warning and pack changes to this  
47 increase in smoker responses cannot be determined in this study. Nonetheless, recent  
48  
49  
50  
51  
52  
53  
54  
55  
56  
57  
58  
59  
60



1  
2  
3 evidence from eye-tracking studies suggests that plain packing itself can increase visual  
4  
5 attention towards warning information on cigarette packs.<sup>35, 36</sup>  
6  
7

8  
9 Extending experimental evidence on the influence of plain packaging on brand appeal,<sup>7-9, 37</sup>  
10 the current study demonstrates an impact of the new packs on adult smokers' perceptions that  
11 their own packs are fashionable or attractive, that they match their style or say something  
12 good about them to other smokers, or that the pack makes their brand stand out or influences  
13 the brand they buy. There is a wide body of evidence from marketing literature that shows  
14 how branding and packaging can modify the expected and actual subjective experience of  
15 products.<sup>38</sup> Notably, changes in the way smokers perceive their pack have the potential to  
16 augment smokers' subjective experience of smoking, leading to a more negative perception  
17 of the taste of their cigarettes and less enjoyment in the act of smoking.<sup>7</sup> Indeed, anecdotal  
18 evidence suggests that Australian smokers reported their cigarettes tasted worse with the  
19 introduction of plain packaging,<sup>39, 40</sup> and smokers smoking from plain packs during the  
20 phase-in period perceived their cigarettes to be less satisfying and lower in quality than a year  
21 ago.<sup>2</sup> The likely impact of changes in the perceived experience of smoking is an avenue for  
22 future studies, but research identifying enjoyment of smoking as a barrier to quitting suggests  
23 that smokers who find smoking their less enjoyable might be more likely to try and quit.<sup>41</sup>  
24  
25  
26  
27  
28  
29  
30  
31  
32  
33  
34  
35  
36  
37  
38  
39  
40  
41  
42  
43  
44

45 The temporal pattern of changes found in this study is consistent with other early evaluations  
46 of the impact of the new plain packs. The proportion of smokers reporting negative responses  
47 to their packs and the warnings on them increased throughout the phase-in period,  
48 corresponding to the increasing proportion of plain packs observed in public venues during  
49 that period,<sup>42</sup> and the number of smokers reporting to be smoking from plain packs.<sup>2</sup> The  
50 earliest effects of the new packs have been detected during this phase-in period, with declines  
51  
52  
53  
54  
55  
56  
57  
58  
59  
60

1  
2  
3 in rates of active smoking observed in outdoor dining venues in October-November,<sup>42</sup> and  
4  
5 calls to a cessation helpline peaking in November.<sup>19</sup> From the current time-series analysis,  
6  
7 smokers' tendency to avoid the on-pack health warnings increased significantly in December,  
8  
9 two months after the plain packs started appearing, when plain packs became mandatory for  
10  
11 sale. This coincides with an observed decline in rates of pack display and an increase in  
12  
13 concealment of packs in outdoor venues.<sup>42</sup> Other changes observed in the current study  
14  
15 (cognitive and emotional responses to graphic health warnings, and negative pack  
16  
17 perceptions) reached significance in January, at a time when less than 5% of packs observed  
18  
19 in outdoor venues were fully-branded.<sup>42</sup> These changes occurred just after an increase in the  
20  
21 number of smokers rating their cigarettes as being lower in quality and less satisfying than  
22  
23 one year ago.<sup>2</sup> All changes in pack-related responses observed in the current study were  
24  
25 maintained at eight months after the first appearance of the new packs.  
26  
27  
28  
29  
30  
31

32 The strengths of this study include the use of population-level data collected over a long time  
33  
34 period, resulting in a large sample of adult smokers. As recommended in a recent review of  
35  
36 the plain packaging literature,<sup>5</sup> the use of a time-series approach with multiple data points  
37  
38 before the intervention increased the power to detect any effects over and above long-term  
39  
40 background and seasonal trends, and the inclusion of important time-related potential  
41  
42 covariates decreased threats to the validity of the findings. The logistic regression analyses  
43  
44 allowed us to control for any changes in sample composition in regards to demographic  
45  
46 characteristics such as SES and smoking levels.  
47  
48  
49  
50  
51

52 Limitations of the study include the use of landline-only telephone numbers and a somewhat  
53  
54 low response rate, possibly leading to some bias in sample composition. The rate of mobile-  
55  
56 only households in Australia was recently estimated at 14%, quantifying concerns about  
57  
58  
59  
60

1  
2  
3 excluding these individuals.<sup>43</sup> The response rate is similar to that of other population  
4  
5 telephone surveys on tobacco use in Australia<sup>44</sup> and the overall rates of quitting are similar to  
6  
7 other population studies of NSW smokers<sup>45</sup>. Additionally, both of these sampling issues  
8  
9 were consistent across the study period, limiting their influence on the observed pattern of  
10  
11 results.  
12

13  
14  
15  
16 In an environment of strict tobacco promotion prohibition such as Australia, cigarette  
17  
18 packaging had become the key tool used by the tobacco industry to attract and retain  
19  
20 customers.<sup>46, 47</sup> The purpose of the plain packaging legislation was to deprive tobacco  
21  
22 companies of an ongoing opportunity to promote their products in the community. The  
23  
24 introductory effects of the plain packaging legislation observed in this study are consistent  
25  
26 with the specific objectives of the legislation in regards to increasing the salience and impact  
27  
28 of health warnings, and reducing the promotional appeal of tobacco packaging. Due to the  
29  
30 fact that tobacco packs are handled every time a smoker takes out a cigarette, those who  
31  
32 smoke more than a pack per day were potentially exposed to their new packs almost 4,000  
33  
34 times in the first six months of the legislated changes. The findings of this study suggest that  
35  
36 the new packs are decreasing smokers' identification with their packs and making them think  
37  
38 more closely about the health warnings contained on them, potentially moving them closer to  
39  
40 cessation.  
41  
42  
43  
44  
45  
46  
47  
48  
49  
50  
51  
52  
53  
54  
55  
56  
57  
58  
59  
60

## COPYRIGHT

The Corresponding Author (SD) has the right to grant on behalf of all authors and does grant on behalf of all authors, an exclusive licence on a worldwide basis to the BMJ Publishing Group Ltd to permit this article (if accepted) to be published in BMJ editions and any other BMJ PGL products and sub-licences such use and exploit all subsidiary rights, as set out in our licence.

## COMPETING INTERESTS

SD, TD, JY, DP, DC have completed the Unified Competing Interest form at [www.icmje.org/coi\\_disclosure.pdf](http://www.icmje.org/coi_disclosure.pdf) (available on request from the corresponding author) and declare (1) no support from any third party organisation for the submitted work; (2) no financial relationships with any company that might have an interest in the submitted work in the previous three years; (3) their spouses, partners, or children have no financial relationships that may be relevant to the submitted work; and (4) all authors have no non-financial interests that may be relevant to the submitted work.

## CONTRIBUTORSHIP STATEMENT

SD, DP and JY conceived the study. DP and SD acquired the data. SD searched the literature and extracted the data. TD and SD did the analyses. All authors interpreted the data. SD drafted the manuscript. TD, JY, DP and DC contributed to the initial revision of the manuscript. SD, TD, JY, DP and DC contributed to the critical revision of the manuscript before publication. SD is the guarantor. All authors had full access to all of the data in the study and take responsibility for the integrity of the data and the accuracy of the data analysis.

**TRANSPERANCY**

SD affirms that the manuscript is an honest, accurate, and transparent account of the study being reported; that no important aspects of the study have been omitted; and that any discrepancies from the study as planned have been explained.

**ETHICS APPROVAL**

The CITTS has ethics approval from the NSW Population Health Services Research Ethics Committee (HREC/10/CIPHS/13). All respondents gave informed consent before taking part in the study.

**FUNDING**

This study was internally funded by the Cancer Institute NSW.

**DATA SHARING**

No additional data available.

**REFERENCES**

1. Tobacco Plain Packaging Act 2011 (No. 148, 2011), Australian Commonwealth Government(2011).
2. Wakefield M, Hayes L, Durkin S, Borland R. Introduction effects of the Australian plain packaging policy on adult smokers: a cross-sectional study. *BMJ Open*. 2013;3:e003175.
3. Stead M, Moodie C, Angus K, Bauld L, McNeill A, Thomas J, et al. Is consumer response to plain/standardised tobacco packaging consistent with framework convention on tobacco control guidelines? A systematic review of quantitative studies. *PLoS One*. 2013;8(10):e75919.
4. Quit Victoria CCV. Plain packaging of tobacco products: a review of the evidence. Melbourne: Cancer Council Australia, <http://www.cancervic.org.au/plainfacts/browse.asp?ContainerID=plainfacts-evidence>, 2011.
5. Moodie C, Stead M, Bauld L, McNeill A, Angus K, Hinds K, et al. Plain Tobacco Packaging: A Systematic Review. Available: [http://phrc.lshtm.ac.uk/papers/PHRC\\_006\\_Final\\_Report.pdf](http://phrc.lshtm.ac.uk/papers/PHRC_006_Final_Report.pdf). Accessed 2014 April 10. University of Stirling, 2012.
6. Hammond D. "Plain packaging" regulations for tobacco products: the impact of standardizing the color and design of cigarette packs. *Salud Publica Mex*. 2010;52 Suppl 2:S226-32.
7. Wakefield M, Germain D, Durkin S. How does increasingly plainer cigarette packaging influence adult smokers' perceptions about brand image? An experimental study. *Tob Control*. 2008;17:416-21.

- 1  
2  
3 8. Wakefield M, Germain D, Durkin S, Hammond D, Goldberg M, Borland R. Do larger  
4 pictorial health warnings diminish the need for plain packaging of cigarettes? *Addiction*.  
5  
6 2012;107(6):1159-67.  
7
- 8  
9 9. Germain D, Wakefield MA, Durkin SJ. Adolescents' perceptions of cigarette brand  
10 image: does plain packaging make a difference? *J Adolesc Health*. 2010;46(4):385-92.  
11
- 12 10. Hammond D, Daniel S, White CM. The effect of cigarette branding and plain  
13 packaging on female youth in the United Kingdom. *J Adolesc Health*. 2013;52(2):151-7.  
14
- 15 11. Gallopel-Morvan K, Moodie C, Hammond D, Eker F, Beguinot E, Martinet Y.  
16 Consumer perceptions of cigarette pack design in France: a comparison of regular, limited  
17 edition and plain packaging. *Tob Control*. 2012;21(5):502-6.  
18
- 19 12. Moodie C, Ford A, Mackintosh AM, Hastings G. Young people's perceptions of  
20 cigarette packaging and plain packaging: an online survey. *Nicotine Tob Res*. 2012;14(1):98-  
21 105.  
22
- 23 13. Scheffels J, Lund I. The impact of cigarette branding and plain packaging on  
24 perceptions of product appeal and risk among young adults in Norway: A between-subjects  
25 experimental survey. *BMJ Open*. 2013;3(12):e003732.  
26
- 27 14. McCool J, Webb L, Cameron LD, Hoek J. Graphic warning labels on plain cigarette  
28 packs: Will they make a difference to adolescents? *Soc Sci Med*. 2012;74:1269-73.  
29
- 30 15. Goldberg ME, Liefeld J, Madill J, Vredenburg H. The effect of plain packaging on  
31 response to health warnings. *Am J Public Health*. 1999;89(9):1434-5.  
32
- 33 16. Freeman B, Chapman S, Rimmer M. The case of plain packaging of tobacco products.  
34 *Addiction*. 2008;103:580-90.  
35
- 36 17. Moodie C, Mackintosh AM, Hastings G, Ford A. Young adult smokers' perceptions  
37 of plain packaging: a pilot naturalistic study. *Tob Control*. 2011;20(5):367-73.  
38  
39  
40  
41  
42  
43  
44  
45  
46  
47  
48  
49  
50  
51  
52  
53  
54  
55  
56  
57  
58  
59  
60

- 1  
2  
3 18. Moodie CS, Mackintosh AM. Young adult women smokers' response to using plain  
4  
5 cigarette packaging: a naturalistic approach. *BMJ Open*. 2013;3(3).  
6
- 7 19. Young J, Stacey I, Dobbins T, Dunlop S, Dessaix A, Currow D. The association  
8  
9 between tobacco plain packaging and Quitline calls: a population-based, interrupted time  
10  
11 series analysis. *Med J Aust*. 2014;200(1):29-32.  
12
- 13 20. American Association for Public Opinion Research. Standard definitions: final  
14  
15 dispositions of case codes and outcome rates for surveys. Lenexa, Kansas: AAPOR; 2008.  
16
- 17 21. Wakefield MA, Bowe SJ, Durkin SJ, Yong HH, Spittal MJ, Simpson JA, et al. Does  
18  
19 tobacco-control mass media campaign exposure prevent relapse among recent quitters?  
20  
21 *Nicotine Tob Res*. 2013;15(2):385-92.  
22
- 23 22. Wakefield M, Spittal MJ, Yong HH, Durkin SJ, Borland R. Effects of mass media  
24  
25 campaign exposure intensity and durability on quit attempts in a population-based cohort  
26  
27 study. *Health Educ Res*. 2011;26(6):988-97.  
28
- 29 23. Dunlop S, Perez D, Cotter T, Wakefield M. Televised Antismoking Advertising:  
30  
31 Effects of Level and Duration of Exposure. *Am J Public Health*. 2013;103(8):e66-e73.  
32
- 33 24. OzTAM. Weekly TARP data for all television markets in NSW, Australia, 2005-  
34  
35 2013. Prepared for The Cancer Institute NSW. . North Sydney, Australia: OzTAM Pty Ltd  
36  
37
- 38 25. Wakefield M, Durkin S, Spittal M, Siahpush M, Scollo M, Simpson JA, et al. Impact  
39  
40 of tobacco control policies and mass media campaigns on monthly adult smoking prevalence.  
41  
42 *Am J Public Health*. 2008;98:1443-50.  
43
- 44 26. Australian Bureau of Statistics. Average Weekly Earnings. Canberra, Australia:  
45  
46 Australian Bureau of Statistics, 2013.  
47
- 48 27. SAS Institute Inc. SAS version 9.3. Cary, NC2011.  
49
- 50 28. StataCorp. StataV11.1 Texas, USA: 2009.  
51  
52  
53  
54  
55  
56  
57  
58  
59  
60



- 1  
2  
3 29. Australian Bureau of Statistics. Population by age and sex, Australian states and  
4 territories, June 2006. Canberra: Australian Bureau of Statistics, 2007 Contract No.: cat no.  
5 3201.0.  
6  
7  
8  
9  
10 30. Miller CL, Hill DJ, Quester PG, Hiller JE. Response of mass media, tobacco industry  
11 and smokers to the introduction of graphic cigarette pack warnings in Australia. *Eur J Public*  
12 *Health*. 2009;19(6):644-9.  
13  
14  
15 31. Hammond D. Health warning messages on tobacco products: a review. *Tob Control*.  
16 2011;20(5):327-37.  
17  
18  
19  
20 32. Borland R, Yong HH, Wilson N, Fong GT, Hammond D, Cummings KM, et al. How  
21 reactions to cigarette packet health warnings influence quitting: findings from the ITC Four-  
22 Country survey. *Addiction*. 2009;104(4):669-75.  
23  
24  
25 33. Partos TR, Borland R, Yong HH, Thrasher J, Hammond D. Cigarette packet warning  
26 labels can prevent relapse: findings from the International Tobacco Control 4-Country policy  
27 evaluation cohort study. *Tob Control*. 2012.  
28  
29  
30 34. Borland R, Wilson N, Fong GT, Hammond D, Cummings KM, Yong HH, et al.  
31 Impact of graphic and text warnings on cigarette packs: findings from four countries over five  
32 years. *Tob Control*. 2009;18(5):358-64.  
33  
34  
35 35. Maynard OM, Munafo MR, Leonards U. Visual attention to health warnings on plain  
36 tobacco packaging in adolescent smokers and non-smokers. *Addiction*. 2013;108(2):413-9.  
37  
38  
39 36. Munafo MR, Roberts N, Bauld L, Leonards U. Plain packaging increases visual  
40 attention to health warnings on cigarette packs in non-smokers and weekly smokers but not  
41 daily smokers. *Addiction*. 2011;106(8):1505-10.  
42  
43  
44 37. Goldberg ME, Kindra G, Lefebvre J, Tribu L, Liefeld J, Madill-Marshall J, et al.  
45 When packages can't speak: possible impacts of plain and generic packaging of tobacco  
46  
47  
48  
49  
50  
51  
52  
53  
54  
55  
56  
57  
58  
59  
60

1  
2  
3 products. Expert panel report prepared at the request of Health Canada, 1995 Contract No.:  
4  
5 521716345/6771.  
6

7 38. Wakefield M. Welcome to cardboard country: how plain packaging could change the  
8 subjective experience of smoking. *Tob Control*. 2011;20(5):321-2.  
9

10 39. Dunlevy S, Stark P. Plain packaging leaves bad taste in smokers' mouths. *Herald Sun*  
11 30 November 2012.  
12

13 40. Hagan K, Harrison D. Plain packs 'put off' smokers. *The Age* 30, November 2012.  
14

15 41. Hyland A, Borland R, Li Q, Yong HH, McNeill A, Fong GT, et al. Individual-level  
16 predictors of cessation behaviours among participants in the International Tobacco Control  
17 (ITC) Four Country Survey. *Tob Control*. 2006;15 Suppl 3:iii83-94.  
18

19 42. Zacher M, Bayly M, Brennan E, Dono J, Miller C, Durkin S, et al. Personal tobacco  
20 pack display before and after the introduction of plain packaging with larger pictorial health  
21 warnings in Australia: an observational study of outdoor café strips. *Addiction*. in press.  
22

23 43. Pennay D, Bishop N. Profiling the 'mobile only' population: A study of Australians  
24 with a mobile phone and no landline telephone. Melbourne: Social Research Centre, 2009.  
25

26 44. Thompson ME, Fong GT, Hammond D, Boudreau C, Driezen P, Hyland A, et al.  
27 Methods of the International Tobacco Control (ITC) Four Country Survey. *Tob Control*.  
28 2006;15(Suppl 3):iii12-iii8.  
29

30 45. Cancer Institute NSW. New South Wales Smoking and Health Survey 2009. Sydney,  
31 Australia: Cancer Institute NSW, 2009.  
32

33 46. Wakefield M, Morley C, Horan JK, Cummings KM. The cigarette pack as image:  
34 new evidence from tobacco industry documents. *Tob Control*. 2002;11(Suppl I):i73-i80.  
35

36 47. Carter SM. The Australian cigarette brand as product, person, and symbol. *Tob*  
37 *Control*. 2003;12 Suppl 3:iii79-86.  
38  
39  
40  
41  
42  
43  
44  
45  
46  
47  
48  
49  
50  
51  
52  
53  
54  
55  
56  
57  
58  
59  
60

Table 1. Sample characteristics from the Cancer Institute's Tobacco Tracking Survey (CITTS) April 2006-May 2012 (smokers only;  $n=15,745$ )

|                              | <i>N</i> | %  |
|------------------------------|----------|----|
| <b>Sex:</b>                  |          |    |
| Female                       | 8298     | 50 |
| Male                         | 7503     | 50 |
| <b>Age:</b>                  |          |    |
| 18-29 yrs                    | 2405     | 21 |
| 30-55 yrs                    | 8470     | 48 |
| 55+ yrs                      | 4924     | 31 |
| <b>Socio-Economic Status</b> |          |    |
| Low                          | 6577     | 41 |
| Mod                          | 4071     | 27 |
| High                         | 4974     | 33 |
| <b>Smoking</b>               |          |    |
| Low                          | 5827     | 41 |
| Mod                          | 5837     | 38 |
| High                         | 3473     | 22 |
| <b>Year:</b>                 |          |    |
| 2006                         | 1600     | 10 |
| 2007                         | 2289     | 15 |
| 2008                         | 2094     | 13 |
| 2009                         | 2135     | 14 |
| 2010                         | 2146     | 14 |
| 2011                         | 2157     | 14 |
| 2012                         | 2126     | 13 |
| 2013                         | 1254     | 8  |

Notes. *N*s are unweighted, %s are weighted for age, sex, and location

1  
2  
3  
4  
5  
6  
7  
8  
9  
10  
11  
12  
13  
14  
15  
16  
17  
18  
19  
20  
21  
22  
23  
24  
25  
26  
27  
28  
29  
30  
31  
32  
33  
34  
35  
36  
37  
38  
39  
40  
41  
42  
43  
44  
45  
46  
47  
48  
49

Figure 1: Monthly proportions of smokers strongly agreeing that: (a) the graphic warnings encourage me to stop smoking (cognitive response); (b) with the graphic warnings, each time I get a cigarette out I worry that I shouldn't be smoking (emotional response); (c) they make me feel that I should hide or cover my packet from the view of others (avoidant response); (d) the only thing I notice on my cigarette pack is the graphic warnings (warning salience)

For peer review only

1  
2  
3  
4  
5  
6  
7  
8  
9  
10  
11  
12  
13  
14  
15  
16  
17  
18  
19  
20  
21  
22  
23  
24  
25  
26  
27  
28  
29  
30  
31  
32  
33  
34  
35  
36  
37  
38  
39  
40  
41  
42  
43  
44  
45  
46  
47  
48  
49

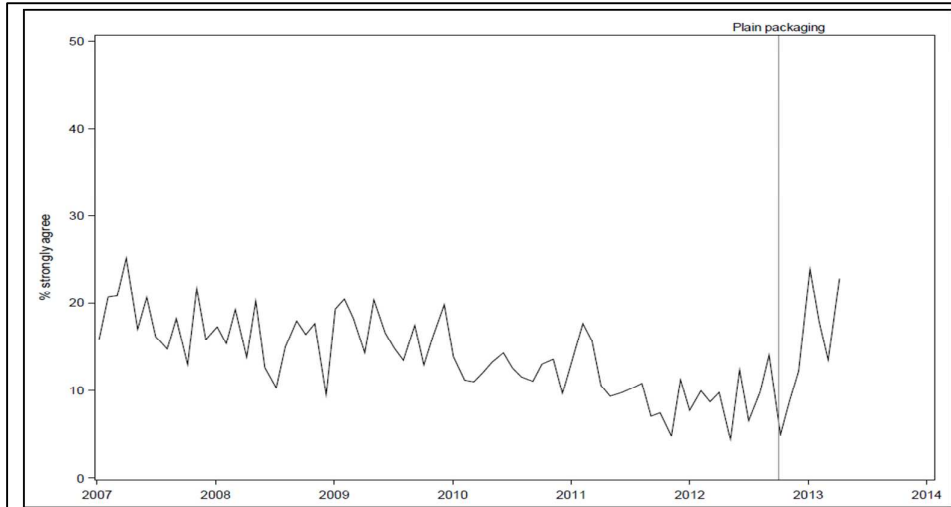

a) Cognitive response

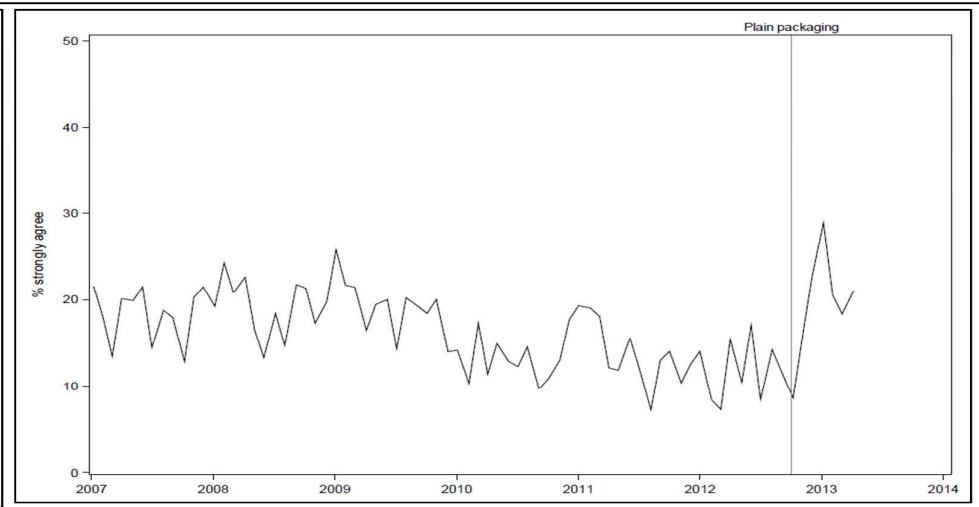

b) Emotional response

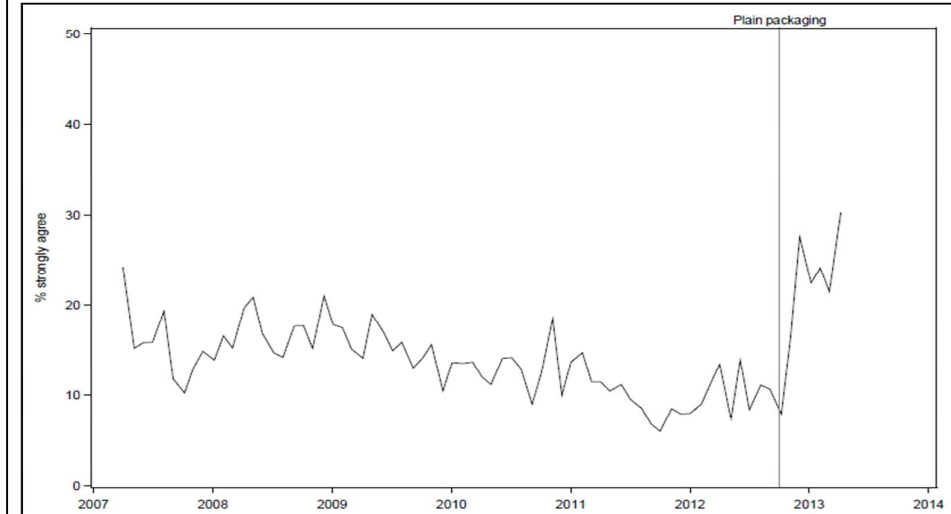

c) Avoidant response

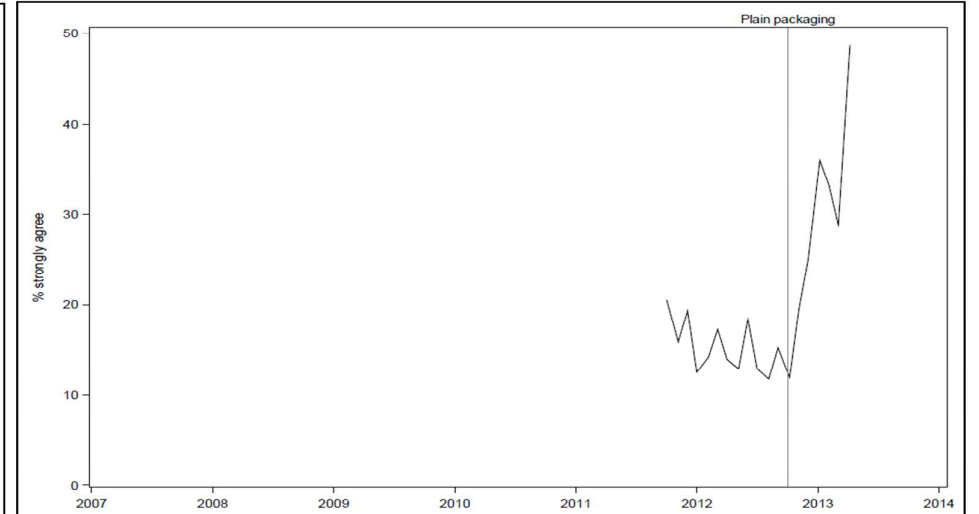

d) Warning salience

1  
2  
3  
4  
5  
6  
7  
8  
9  
10  
11  
12  
13  
14  
15  
16  
17  
18  
19  
20  
21  
22  
23  
24  
25  
26  
27  
28  
29  
30  
31  
32  
33  
34  
35  
36  
37  
38  
39  
40  
41  
42  
43  
44  
45  
46  
47  
48  
49

Figure 2: Monthly proportions of smokers strongly disagreeing that their cigarette pack is: (a) attractive; (b) says something good about me to other smokers; (c) influences the brand I buy; (d) makes my brand stand out from other brands; (e) is fashionable; (f) matches my style

For peer review only

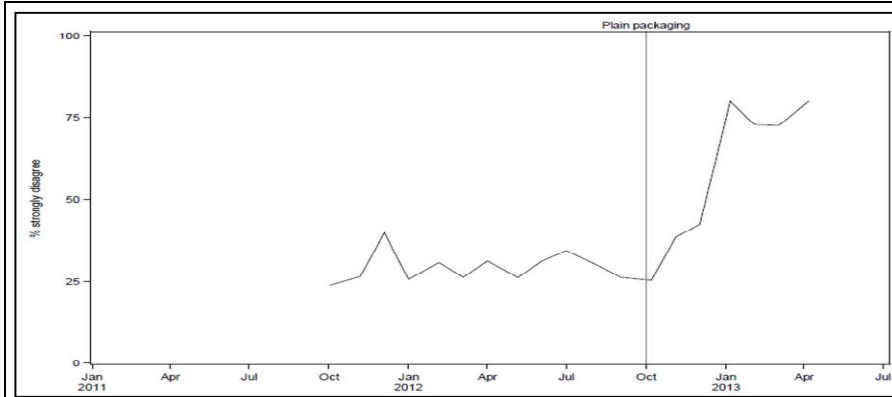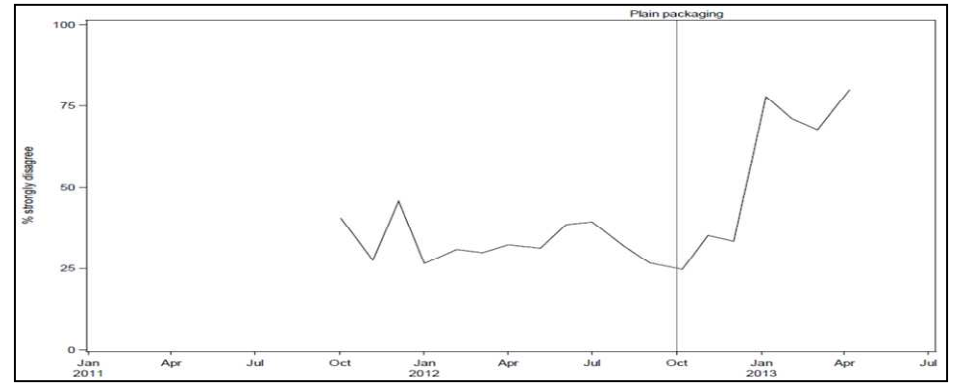

a) Attractive

b) Says something good about me

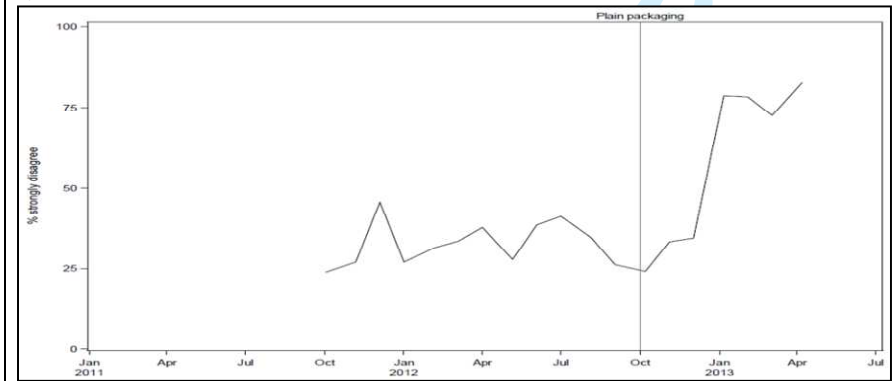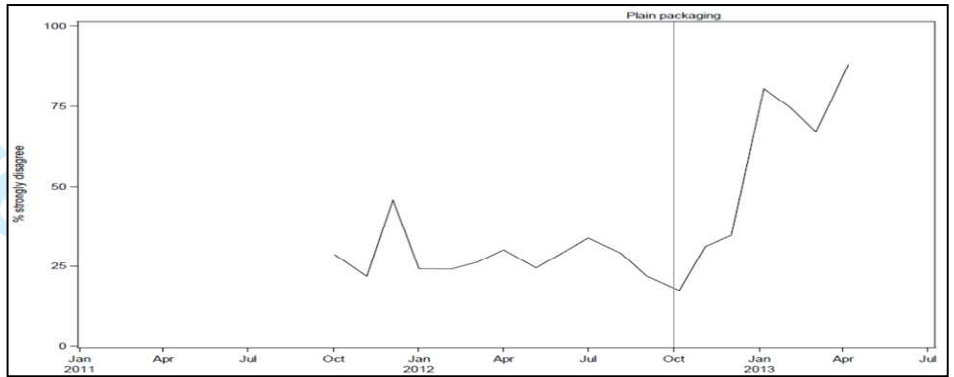

c) Influences the brand I buy

d) Make my brand stand out from others

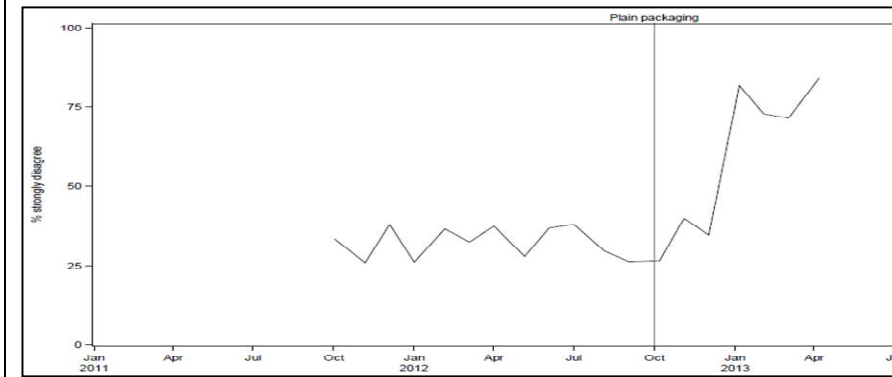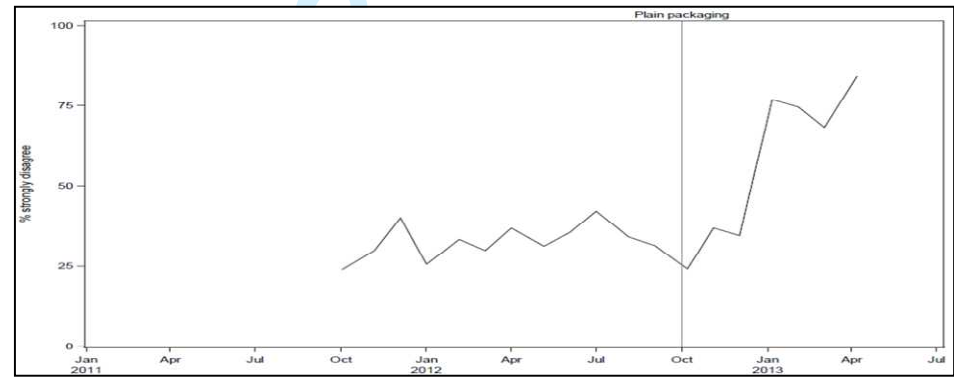

e) Fashionable

f) Matches my style

Table 2. Results of interrupted time series analyses investigating the impact of new tobacco packaging on smokers' responses to graphic health warnings and pack attitudes

|                                                     |                                           | <b>Increase in %<br/>strongly agree<br/>(95% CI)</b>    | <b>P</b> |
|-----------------------------------------------------|-------------------------------------------|---------------------------------------------------------|----------|
| <b>Responses to<br/>graphic health<br/>warnings</b> | Cognitive <sup>a</sup>                    | 9.8 (3.0, 16.5)                                         | 0.005    |
|                                                     | Emotional <sup>a</sup>                    | 8.6 (1.7, 15.4)                                         | 0.010    |
|                                                     | Avoidant <sup>b</sup>                     | 9.8 (4.2, 15.3)                                         | <0.001   |
|                                                     | Warning Salience <sup>c</sup>             | 2.5 (-10.1, 15.1)                                       | 0.700    |
|                                                     |                                           | <b>Increase in %<br/>strongly disagree<br/>(95% CI)</b> |          |
| <b>Pack perceptions</b>                             | Attractive <sup>c</sup>                   | 57.5 (38.0, 77.1)                                       | <0.001   |
|                                                     | Says something good about me <sup>c</sup> | 54.5 (36.9, 72.1)                                       | <0.001   |
|                                                     | Influences the brand I buy <sup>c</sup>   | 40.6 (23.2, 58.0)                                       | <0.001   |
|                                                     | Makes my brand stand out <sup>c</sup>     | 55.6 (35.0, 76.2)                                       | <0.001   |
|                                                     | Is fashionable <sup>c</sup>               | 44.7 (28.1, 61.2)                                       | <0.001   |
|                                                     | Matches my style <sup>c</sup>             | 48.1 (32.2, 64.0)                                       | <0.001   |

Notes. All models adjusted for TARPs, cigarette costliness, and seasonal variations (where possible); full results available from authors on request; all effects occurred at 3-months lag, except for 'avoidant' responses to the graphic health warnings (2-month lag); <sup>a</sup> Data available April 2006 – May 2013; <sup>b</sup> Data available April 2007 – May 2013; <sup>c</sup> Data available October 2011 – May 2013.



Table 3. Logistic regression analyses investigating responses to graphic health warnings and pack perceptions before and after the introduction of the new tobacco packs, as well as in the comparison period

|                    |               | Comparison period<br>(2011-2012) |      |      |      |       | Plain packaging period<br>(2012-2013) |      |      |       |        |
|--------------------|---------------|----------------------------------|------|------|------|-------|---------------------------------------|------|------|-------|--------|
|                    |               | %                                | O.R. | C.I. | P    | %     | O.R.                                  | C.I. | P    |       |        |
| <b>Cognitive</b>   | <b>Month:</b> |                                  |      |      |      |       |                                       |      |      |       |        |
| <b>response to</b> | Aug/Sept      | 8%                               | 1    |      |      |       | 10%                                   | 1    |      |       |        |
| <b>health</b>      | Oct/Nov       | 6%                               | 0.59 | 0.27 | 1.29 | 0.188 | 7%                                    | 0.71 | 0.36 | 1.42  | 0.337  |
| <b>warnings</b>    | Dec/Jan       | 8%                               | 1.14 | 0.51 | 2.55 | 0.742 | 18%                                   | 1.97 | 1.18 | 3.30  | 0.009  |
|                    | Feb/March     | 6%                               | 1.00 | 0.37 | 2.67 | 1.000 | 14%                                   | 1.50 | 0.91 | 2.47  | 0.108  |
|                    | April/May     | 8%                               | 1.39 | 0.30 | 6.50 | 0.677 | 19%                                   | 2.20 | 1.33 | 3.63  | 0.002  |
| <b>Emotional</b>   | <b>Month:</b> |                                  |      |      |      |       |                                       |      |      |       |        |
| <b>response to</b> | Aug/Sept      | 8%                               | 1    |      |      |       | 11%                                   | 1    |      |       |        |
| <b>health</b>      | Oct/Nov       | 14%                              | 1.56 | 0.87 | 2.80 | 0.137 | 12%                                   | 0.89 | 0.53 | 1.49  | 0.653  |
| <b>warnings</b>    | Dec/Jan       | 13%                              | 1.75 | 0.91 | 3.33 | 0.091 | 26%                                   | 2.49 | 1.59 | 3.90  | <0.001 |
|                    | Feb/March     | 7%                               | 1.05 | 0.47 | 2.35 | 0.911 | 20%                                   | 2.03 | 1.32 | 3.13  | 0.001  |
|                    | April/May     | 13%                              | 2.42 | 0.70 | 8.41 | 0.164 | 24%                                   | 2.26 | 1.45 | 3.51  | <0.001 |
| <b>Avoidant</b>    | <b>Month:</b> |                                  |      |      |      |       |                                       |      |      |       |        |
| <b>response to</b> | Aug/Sept      | 8%                               | 1    |      |      |       | 10%                                   | 1    |      |       |        |
| <b>health</b>      | Oct/Nov       | 8%                               | 1.06 | 0.50 | 2.22 | 0.887 | 11%                                   | 1.13 | 0.66 | 1.92  | 0.662  |
| <b>warnings</b>    | Dec/Jan       | 7%                               | 0.71 | 0.33 | 1.53 | 0.386 | 29%                                   | 3.62 | 2.26 | 5.78  | <0.001 |
|                    | Feb/March     | 10%                              | 0.98 | 0.39 | 2.43 | 0.961 | 21%                                   | 2.22 | 1.42 | 3.45  | <0.001 |
|                    | April/May     | 10%                              | 0.71 | 0.18 | 2.86 | 0.631 | 25%                                   | 2.93 | 1.84 | 4.65  | <0.001 |
| <b>Salience of</b> | <b>Month:</b> |                                  |      |      |      |       |                                       |      |      |       |        |
| <b>health</b>      | Aug/Sept      | n/a                              |      |      |      | 12%   | 1                                     |      |      |       |        |
| <b>warnings</b>    | Oct/Nov       | 15%                              | 1    |      |      |       | 15%                                   | 1.28 | 0.78 | 2.08  | 0.326  |
|                    | Dec/Jan       | 15%                              | 1.19 | 0.59 | 2.38 | 0.623 | 34%                                   | 3.70 | 2.40 | 5.69  | <0.001 |
|                    | Feb/March     | 13%                              | 1.18 | 0.50 | 2.76 | 0.710 | 32%                                   | 3.29 | 2.19 | 4.93  | <0.001 |
|                    | April/May     | 13%                              | 1.65 | 0.38 | 7.14 | 0.505 | 36%                                   | 4.18 | 2.74 | 6.39  | <0.001 |
| <b>Negative</b>    | <b>Month:</b> |                                  |      |      |      |       |                                       |      |      |       |        |
| <b>Pack</b>        | Aug/Sept      | n/a                              |      |      |      | 15%   | 1                                     |      |      |       |        |
| <b>Perception</b>  | Oct/Nov       | 14%                              | 1    |      |      |       | 14%                                   | 1.48 | 1.01 | 2.17  | 0.045  |
| <b>Index</b>       | Dec/Jan       | 17%                              | 1.09 | 0.61 | 1.94 | 0.782 | 45%                                   | 6.73 | 4.64 | 9.76  | <0.001 |
|                    | Feb/March     | 14%                              | 1.19 | 0.56 | 2.49 | 0.653 | 51%                                   | 7.41 | 5.23 | 10.52 | <0.001 |

---

|           |     |      |      |      |       |     |       |      |       |        |
|-----------|-----|------|------|------|-------|-----|-------|------|-------|--------|
| April/May | 16% | 1.38 | 0.40 | 4.77 | 0.612 | 58% | 14.48 | 9.58 | 21.89 | <0.001 |
|-----------|-----|------|------|------|-------|-----|-------|------|-------|--------|

---

Notes. All models controlled for demographics (sex, age, SES), smoking characteristics (level of smoking, previous quitting history) and anti-smoking advertising activity (TARPs); % are unweighted; O.R=Odds Ratio; C.I=95% Confidence Interval

For peer review only

1  
2  
3  
4  
5  
6  
7  
8  
9  
10  
11  
12  
13  
14  
15  
16  
17  
18  
19  
20  
21  
22  
23  
24  
25  
26  
27  
28  
29  
30  
31  
32  
33  
34  
35  
36  
37  
38  
39  
40  
41  
42  
43  
44  
45  
46  
47  
48  
49  
50  
51  
52  
53  
54  
55  
56  
57  
58  
59  
60

## STROBE Statement—checklist of items that should be included in reports of observational studies

|                              | Item No | Recommendation                                                                                                                                                                                                                                                                                                                                                                                                                                                         | Y/N |
|------------------------------|---------|------------------------------------------------------------------------------------------------------------------------------------------------------------------------------------------------------------------------------------------------------------------------------------------------------------------------------------------------------------------------------------------------------------------------------------------------------------------------|-----|
| <b>Title and abstract</b>    | 1       | (a) Indicate the study's design with a commonly used term in the title or the abstract                                                                                                                                                                                                                                                                                                                                                                                 | Y   |
|                              |         | (b) Provide in the abstract an informative and balanced summary of what was done and what was found                                                                                                                                                                                                                                                                                                                                                                    | Y   |
| <b>Introduction</b>          |         |                                                                                                                                                                                                                                                                                                                                                                                                                                                                        |     |
| Background/rationale         | 2       | Explain the scientific background and rationale for the investigation being reported                                                                                                                                                                                                                                                                                                                                                                                   | Y   |
| Objectives                   | 3       | State specific objectives, including any prespecified hypotheses                                                                                                                                                                                                                                                                                                                                                                                                       | Y   |
| <b>Methods</b>               |         |                                                                                                                                                                                                                                                                                                                                                                                                                                                                        |     |
| Study design                 | 4       | Present key elements of study design early in the paper                                                                                                                                                                                                                                                                                                                                                                                                                | Y   |
| Setting                      | 5       | Describe the setting, locations, and relevant dates, including periods of recruitment, exposure, follow-up, and data collection                                                                                                                                                                                                                                                                                                                                        | Y   |
| Participants                 | 6       | (a) <i>Cohort study</i> —Give the eligibility criteria, and the sources and methods of selection of participants. Describe methods of follow-up<br><i>Case-control study</i> —Give the eligibility criteria, and the sources and methods of case ascertainment and control selection. Give the rationale for the choice of cases and controls<br><i>Cross-sectional study</i> —Give the eligibility criteria, and the sources and methods of selection of participants | Y   |
|                              |         | (b) <i>Cohort study</i> —For matched studies, give matching criteria and number of exposed and unexposed<br><i>Case-control study</i> —For matched studies, give matching criteria and the number of controls per case                                                                                                                                                                                                                                                 |     |
| Variables                    | 7       | Clearly define all outcomes, exposures, predictors, potential confounders, and effect modifiers. Give diagnostic criteria, if applicable                                                                                                                                                                                                                                                                                                                               | Y   |
| Data sources/<br>measurement | 8*      | For each variable of interest, give sources of data and details of methods of assessment (measurement). Describe comparability of assessment methods if there is more than one group                                                                                                                                                                                                                                                                                   | Y   |
| Bias                         | 9       | Describe any efforts to address potential sources of bias                                                                                                                                                                                                                                                                                                                                                                                                              | Y   |
| Study size                   | 10      | Explain how the study size was arrived at                                                                                                                                                                                                                                                                                                                                                                                                                              | Y   |
| Quantitative variables       | 11      | Explain how quantitative variables were handled in the analyses. If applicable, describe which groupings were chosen and why                                                                                                                                                                                                                                                                                                                                           | Y   |
| Statistical methods          | 12      | (a) Describe all statistical methods, including those used to control for confounding                                                                                                                                                                                                                                                                                                                                                                                  | Y   |
|                              |         | (b) Describe any methods used to examine subgroups and interactions                                                                                                                                                                                                                                                                                                                                                                                                    | Y   |
|                              |         | (c) Explain how missing data were addressed                                                                                                                                                                                                                                                                                                                                                                                                                            | Y   |
|                              |         | (d) <i>Cohort study</i> —If applicable, explain how loss to follow-up was addressed<br><i>Case-control study</i> —If applicable, explain how matching of cases and controls was addressed<br><i>Cross-sectional study</i> —If applicable, describe analytical methods taking account of sampling strategy                                                                                                                                                              | Y   |
|                              |         | (e) Describe any sensitivity analyses                                                                                                                                                                                                                                                                                                                                                                                                                                  |     |

Continued on next page

| <b>Results</b>           |     |                                                                                                                                                                                                                                                                                                                                                                                                               |   |
|--------------------------|-----|---------------------------------------------------------------------------------------------------------------------------------------------------------------------------------------------------------------------------------------------------------------------------------------------------------------------------------------------------------------------------------------------------------------|---|
| Participants             | 13* | (a) Report numbers of individuals at each stage of study—eg numbers potentially eligible, examined for eligibility, confirmed eligible, included in the study, completing follow-up, and analysed<br>(b) Give reasons for non-participation at each stage<br>(c) Consider use of a flow diagram                                                                                                               | Y |
| Descriptive data         | 14* | (a) Give characteristics of study participants (eg demographic, clinical, social) and information on exposures and potential confounders<br>(b) Indicate number of participants with missing data for each variable of interest<br>(c) <i>Cohort study</i> —Summarise follow-up time (eg, average and total amount)                                                                                           | Y |
| Outcome data             | 15* | <i>Cohort study</i> —Report numbers of outcome events or summary measures over time<br><i>Case-control study</i> —Report numbers in each exposure category, or summary measures of exposure<br><i>Cross-sectional study</i> —Report numbers of outcome events or summary measures                                                                                                                             | Y |
| Main results             | 16  | (a) Give unadjusted estimates and, if applicable, confounder-adjusted estimates and their precision (eg, 95% confidence interval). Make clear which confounders were adjusted for and why they were included<br>(b) Report category boundaries when continuous variables were categorized<br>(c) If relevant, consider translating estimates of relative risk into absolute risk for a meaningful time period | Y |
| Other analyses           | 17  | Report other analyses done—eg analyses of subgroups and interactions, and sensitivity analyses                                                                                                                                                                                                                                                                                                                |   |
| <b>Discussion</b>        |     |                                                                                                                                                                                                                                                                                                                                                                                                               |   |
| Key results              | 18  | Summarise key results with reference to study objectives                                                                                                                                                                                                                                                                                                                                                      | Y |
| Limitations              | 19  | Discuss limitations of the study, taking into account sources of potential bias or imprecision. Discuss both direction and magnitude of any potential bias                                                                                                                                                                                                                                                    | Y |
| Interpretation           | 20  | Give a cautious overall interpretation of results considering objectives, limitations, multiplicity of analyses, results from similar studies, and other relevant evidence                                                                                                                                                                                                                                    | Y |
| Generalisability         | 21  | Discuss the generalisability (external validity) of the study results                                                                                                                                                                                                                                                                                                                                         | Y |
| <b>Other information</b> |     |                                                                                                                                                                                                                                                                                                                                                                                                               |   |
| Funding                  | 22  | Give the source of funding and the role of the funders for the present study and, if applicable, for the original study on which the present article is based                                                                                                                                                                                                                                                 | Y |

\*Give information separately for cases and controls in case-control studies and, if applicable, for exposed and unexposed groups in cohort and cross-sectional studies.

**Note:** An Explanation and Elaboration article discusses each checklist item and gives methodological background and published examples of transparent reporting. The STROBE checklist is best used in conjunction with this article (freely available on the Web sites of PLoS Medicine at <http://www.plosmedicine.org/>, Annals of Internal Medicine at <http://www.annals.org/>, and Epidemiology at <http://www.epidem.com/>). Information on the STROBE Initiative is available at [www.strobe-statement.org](http://www.strobe-statement.org).

# BMJ Open

## Impact of Australia's introduction of tobacco plain packs on adult smokers' pack-related perceptions and responses: Results from a continuous tracking survey

|                                 |                                                                                                                                                                                                                                                                                                                                                                                                                          |
|---------------------------------|--------------------------------------------------------------------------------------------------------------------------------------------------------------------------------------------------------------------------------------------------------------------------------------------------------------------------------------------------------------------------------------------------------------------------|
| Journal:                        | <i>BMJ Open</i>                                                                                                                                                                                                                                                                                                                                                                                                          |
| Manuscript ID:                  | bmjopen-2014-005836.R1                                                                                                                                                                                                                                                                                                                                                                                                   |
| Article Type:                   | Research                                                                                                                                                                                                                                                                                                                                                                                                                 |
| Date Submitted by the Author:   | 30-Oct-2014                                                                                                                                                                                                                                                                                                                                                                                                              |
| Complete List of Authors:       | Dunlop, Sally; Cancer Institute NSW, Cancer Screening and Prevention<br>Dobbins, Timothy; Australian National University,<br>Young, Jane; University of Sydney, Cancer Epidemiology and Services<br>Research (CESR); Sydney South West Area Health Service, Surgical<br>Outcomes Research Centre (SOuRCe)<br>Perez, Donna; Cancer Institute NSW, Cancer Screening and Prevention<br>Currow, David; Cancer Institute NSW, |
| <b>Primary Subject Heading</b>: | Smoking and tobacco                                                                                                                                                                                                                                                                                                                                                                                                      |
| Secondary Subject Heading:      | Public health, Health policy, Evidence based practice                                                                                                                                                                                                                                                                                                                                                                    |
| Keywords:                       | Health policy < HEALTH SERVICES ADMINISTRATION & MANAGEMENT,<br>PUBLIC HEALTH, PREVENTIVE MEDICINE                                                                                                                                                                                                                                                                                                                       |
|                                 |                                                                                                                                                                                                                                                                                                                                                                                                                          |

SCHOLARONE™  
Manuscripts

1  
2  
3 **Impact of Australia's introduction of tobacco plain packs on adult smokers' pack-**  
4 **related perceptions and responses: Results from a continuous tracking survey**  
5  
6  
7  
8

9 Sally M Dunlop, Timothy Dobbins, Jane M Young, Donna Perez, David C Currow  
10  
11  
12  
13  
14  
15  
16  
17

18 **Dr Sally Dunlop**  
19

20 Cancer Institute New South Wales, Australian Technology Park, Level 9, 8 Central Avenue,  
21  
22 Eveleigh New South Wales, 2015, Australia  
23  
24 Senior Research Officer, Cancer Screening and Prevention  
25  
26  
27  
28

29 **Dr Timothy Dobbins**  
30

31 Australian National University, Canberra, ACT, 0200, Australia  
32  
33 Research Fellow, National Centre for Epidemiology and Population Health  
34  
35  
36  
37

38 **Prof Jane M Young**  
39

40 Sydney School of Public Health, Queen Elizabeth II Research Institute (D02), University of  
41  
42 Sydney, New South Wales, 2006, Australia  
43  
44 Professor in Cancer Epidemiology, Cancer Epidemiology and Services Research  
45  
46  
47  
48

49 **Ms Donna Perez**  
50

51 Cancer Institute New South Wales, Australian Technology Park, Level 9, 8 Central Avenue,  
52  
53 Eveleigh New South Wales, 2015, Australia  
54  
55 Research and Evaluation Coordinator, Cancer Screening and Prevention  
56  
57  
58  
59  
60

1  
2  
3  
4  
5 **Prof David C Currow**  
6

7 Cancer Institute New South Wales, Australian Technology Park, Level 9, 8 Central Avenue,  
8

9  
10 Eveleigh New South Wales, 2015, Australia

11  
12 Chief Executive Officer and Chief Cancer Officer  
13

14  
15  
16 **Correspondence to:** Sally Dunlop [sally.dunlop@cancerinstitute.org.au](mailto:sally.dunlop@cancerinstitute.org.au)  
17  
18  
19  
20  
21  
22  
23  
24  
25  
26  
27  
28  
29  
30  
31  
32  
33  
34  
35  
36  
37  
38  
39  
40  
41  
42  
43  
44  
45  
46  
47  
48  
49  
50  
51  
52  
53  
54  
55  
56  
57  
58  
59  
60

**ABSTRACT**

**Objectives** – To investigate the impact of Australia’s plain tobacco packaging policy on two stated purposes of the legislation – increasing the impact of health warnings and decreasing the promotional appeal of packaging – among adult smokers.

**Design** – Serial cross-sectional study with weekly telephone surveys (April 2006 to May 2013). Interrupted time-series analyses using ARIMA modelling and linear regression models were used to investigate intervention effects.

**Participants** – 15,745 adult smokers (aged 18 years and over) in New South Wales (NSW), Australia. Random selection of participants involved recruiting households using random digit dialling and selecting the *n*th oldest smoker for interview.

**Intervention** – The introduction of the legislation on 1<sup>st</sup> October 2012.

**Outcomes** – Salience of tobacco pack health warnings, cognitive and emotional responses to warnings, avoidance of warnings, perceptions regarding one’s cigarette pack.

**Results** – Adjusting for background trends, seasonality, anti-smoking advertising activity, and cigarette costliness, results from ARIMA modelling showed that, two to three months after the introduction of the new packs, there was a significant increase in the absolute proportion of smokers having strong cognitive (9.8% increase,  $p=0.005$ ), emotional (8.6% increase,  $p=0.01$ ), and avoidant (9.8% increase,  $p=0.0005$ ) responses to on-pack health warnings. Similarly, there was a significant increase in the proportion of smokers strongly disagreeing that the look of their cigarette pack is attractive (57.5% increase,  $p<0.0001$ ), says something good about them (54.5% increase,  $p<0.0001$ ), influences the brand they buy (40.6% increase,  $p<0.0001$ ), makes their pack stand out (55.6% increase,  $p<0.0001$ ), is fashionable (44.7% increase,  $p<0.0001$ ), and matches their style (48.1% increase,  $p<0.0001$ ). Changes in these outcomes were maintained six months post-intervention.



1  
2  
3 **Conclusions** – The introductory effects of the plain packaging legislation among adult  
4 smokers are consistent with the specific objectives of the legislation in regards to reducing  
5 promotional appeal and increasing effectiveness of health warnings.  
6  
7  
8  
9  
10  
11  
12  
13  
14  
15  
16  
17  
18  
19  
20  
21  
22  
23  
24  
25  
26  
27  
28  
29  
30  
31  
32  
33  
34  
35  
36  
37  
38  
39  
40  
41  
42  
43  
44  
45  
46  
47  
48  
49  
50  
51  
52  
53  
54  
55  
56  
57  
58  
59  
60

For peer review only

**ARTICLE SUMMARY****Article Focus**

- Experimental research has shown that plain tobacco packaging can: reduce the appeal of tobacco products to consumers; increase the effectiveness of health warnings; and reduce the ability of packaging to mislead consumers about the harmful effects of smoking.
- Given that the introduction of the tobacco plain packaging legislation in Australia is the first of its kind, no research to date has investigated the impact of plain packaging on these outcomes in a real-world context with mandated plain packs.

**Key Findings**

- The introductory effects of the new packs observed in this study are consistent with the specific objectives and expected effects of the plain packaging legislation.
- This is the first study to date to demonstrate an impact of the Australian plain tobacco packs on the salience and impact of on-pack health warnings and negative perceptions about tobacco packs among adult smokers.

**Strengths and Limitations**

- Study strengths are: the use of population-level data collected over a long time period, with a large sample of adult smokers; the use of a time-series approach with multiple data points before the intervention; and the inclusion of important time-related and sample-related potential covariates.
- Limitations of the study include the use of landline-only telephone numbers and a somewhat low response rate, potentially leading to some bias in sample composition. Response rate was consistent across the study period, limiting the impact on study findings.

1  
2  
3  
4 On the 1<sup>st</sup> of December 2012, Australia became the first country to introduce mandatory plain  
5  
6 packaging for all tobacco products.<sup>1</sup> The new plain packs are olive green cardboard packages  
7  
8 devoid of all brand design elements, with brand name and number of cigarettes written in a  
9  
10 standardised font and location on each pack. The new packs continue to carry coloured  
11  
12 graphic health warnings covering 90% of the back of packs, with the warnings on the front of  
13  
14 pack enlarged from 30% to 75%. Manufacturers were required to produce the new packs  
15  
16 from the 1<sup>st</sup> of October 2012 and they started appearing for sale from that date; approximately  
17  
18 80% of smokers were using plain packs by mid-November.<sup>2</sup>  
19  
20  
21  
22  
23

24 The plain packaging legislation aims to discourage people from taking up smoking,  
25  
26 encourage smokers to give up smoking, and discourage relapse.<sup>1</sup> The stated purpose of the  
27  
28 legislation is to regulate the packaging and appearance of tobacco products in order to: (a)  
29  
30 reduce the appeal of tobacco products to consumers, (b) increase the effectiveness of health  
31  
32 warnings, and (c) reduce the ability of packaging to mislead consumers about the harmful  
33  
34 effects of smoking. As this was the first time any such legislation had been implemented, the  
35  
36 expected outcomes of the new packs were informed by a body of research consisting  
37  
38 primarily of experimental studies, summarised in recent reviews.<sup>3-6</sup>  
39  
40  
41  
42  
43

44 Studies in which participants were presented with mocked-up plain and branded tobacco  
45  
46 packs show that plain packaging has the potential to reduce the promotional appeal of a pack,  
47  
48 diminish positive perceptions about smokers of cigarettes from that pack, and reduce the  
49  
50 appeal of smoking in general.<sup>7-13</sup> Such studies also suggest that health warnings are both  
51  
52 more noticeable and more effective when presented on plain rather than branded packs,<sup>14, 15</sup>  
53  
54 with researchers suggesting that brand imagery diffuses the impact of health warnings.<sup>16</sup>  
55  
56  
57  
58  
59  
60

1  
2  
3 These results have been corroborated in naturalistic studies in which smokers are assigned to  
4 smoke their normal cigarettes from either plain or branded packs for a period of time, with  
5 plain pack smokers reporting increased negative perceptions about to their pack and smoking,  
6 along with an increased impact of health warnings.<sup>17, 18</sup> A limitation of these previous studies,  
7 however, is the inability to differentiate the impact of plain packaging and the novelty impact  
8 of a pack which is simply different to the packs that smokers are used to seeing. No studies to  
9 date have been able to investigate the impact of plain tobacco packaging on tobacco pack  
10 appeal and the salience and effects of health warnings in the context of mandatory plain  
11 packaging, when all packs with which smokers are in contact are devoid of any branding  
12 other than a name in a standard font.  
13  
14  
15  
16  
17  
18  
19  
20  
21  
22  
23  
24  
25  
26

27 In the current study, we use cross-sectional survey data collected weekly for a period of seven  
28 years to investigate the impact of the new packaging on adult smokers' responses to the  
29 health warnings on their packs and perceptions of their packs. It was hypothesised that, after  
30 the introduction of the new packs, smokers would find the health warnings more salient,  
31 would have an increased response to the warnings, and would hold less favourable  
32 perceptions of their packs. The continuous nature of the data allowed us to track how these  
33 outcomes changed after the introduction of the new packs, investigating whether any  
34 observed changes were sustained in the six months following their introduction. This  
35 approach builds on our previous study evaluating the impact of the introduction of the plain  
36 packaging legislation on calls to a smoking cessation helpline.<sup>19</sup> Additionally, given that  
37 responses to graphic pack warnings had been tracked since their initial introduction in 2006,  
38 we were able to assess changes in these responses in the context of longer-term trends.  
39  
40  
41  
42  
43  
44  
45  
46  
47  
48  
49  
50  
51  
52  
53  
54

## 55 56 **METHOD** 57

### Study Design and Participants

The Cancer Institute's Tobacco Tracking Survey (CITTS) is a serial cross-sectional telephone survey with approximately 50 interviews conducted per week throughout the year. The CITTS monitors smoking-related cognitions and behaviours among adult smokers and recent quitters (quit in last 12 months) in New South Wales (NSW), Australia's most populous state. Households are recruited using random digit dialling (landline telephone numbers only) and a random selection procedure is used to recruit participants within households (selecting the *n*th oldest eligible adult). Analyses for this study are limited to smokers interviewed between April 2006 and May 2013 (total *n* = 15,745), with an average response rate of 40% (American Association for Public Opinion Research Response Rate #4).<sup>20</sup> The CITTS is approved by the NSW Population Health Services Research Ethics Committee (HREC/10/CIPHS/13). The study was funded by the Cancer Institute NSW.

### Outcome Measures

Following the introduction of the original graphic health warnings on tobacco packs in March 2006, questions were included in CITTS relating to smokers' responses to the warnings. These questions assessed cognitive response to the warnings ('the graphic warnings encourage me to stop smoking') and emotional response ('with the graphic warnings, each time I get a cigarette out I worry that I shouldn't be smoking'). From April 2007, warning avoidance was also assessed ('they make me feel that I should hide or cover my packet from the view of others'). From October 2011, the salience of the warnings was also assessed ('the only thing I notice on my cigarette pack is the graphic warnings'). All answers were given on a 5-point Likert scale (1=strongly disagree- 5=strongly agree). The distributions of responses to these items over the study period are shown in Supplementary Figure 1. Responses to these items were used in two ways. The first was collapsing responses for each item into a binary

1  
2  
3 variable indicating strong agreement vs. not. The second was averaging the responses to these  
4  
5 items to create a scale indicating 'Graphic Health Warning Impact', with higher scores  
6  
7 indicating greater overall impact (Cronbach's alpha =0.70).  
8  
9

10  
11 From October 2011 smokers were asked a battery of questions relating to their perceptions of  
12  
13 their packs: 'The look of my cigarette pack...' (i) is attractive; (ii) says something good about  
14  
15 me to other smokers; (iii) influences the brand I buy; (iv) makes my brand stand out from  
16  
17 other brands; (v) is fashionable; and (vi) matches my style (1=strongly disagree-5=strongly  
18  
19 agree). Distributions of responses to these items over the study period are shown in  
20  
21 Supplementary Figure 2. Responses to each item were dichotomised into strongly disagree  
22  
23 vs. not, and they were also reverse scored and averaged to create a scale indicating 'Negative  
24  
25 Pack Perceptions' (Cronbach's alpha=0.87), with higher scores indicating more negative  
26  
27 perceptions.  
28  
29  
30  
31  
32  
33

### 34 **Covariates**

35  
36 Data on sex, age, total household income, and educational attainment (low=less than high  
37  
38 school; moderate=high school diploma or vocational college; high=tertiary), were included in  
39  
40 CITTS. Socio-economic status (SES) was indicated by a variable that combined responses to  
41  
42 household income and educational attainment.<sup>21, 22</sup> High SES was defined as having a  
43  
44 household income of more than AUD\$80,000 (and any education level), or an income of  
45  
46 AUD\$40-80,000 and moderate-high education. Moderate SES was defined as either an  
47  
48 income below AUD\$40,000 and high education, or an income of AUD\$40-80,000 and  
49  
50 moderate education. Low SES was defined as either an income below AUD\$40,000 and low  
51  
52 or moderate education, or an income AUD\$40-80,000 and low education. Those with missing  
53  
54 data on one variable were classified based on the other.  
55  
56  
57  
58  
59  
60

1  
2  
3  
4  
5 Frequency of smoking was used to classify smokers as 'daily', 'weekly', or 'less frequent'  
6  
7 smokers. Average number of cigarettes smoked per day was used to indicate heaviness of  
8  
9 smoking (light=less than 10 cigarettes per day; moderate=11-20 cigarettes per day;  
10  
11 heavy=more than 20 cigarettes per day). As smokers' responses to graphic health warnings  
12  
13 and perceptions of their cigarette packs might conceivably be related to their quitting  
14  
15 experiences or propensity towards quitting, we also included quit attempts in the last 12  
16  
17 months as a control variable (1=tried to quit at least once in the last 12 months, 0=did not).  
18  
19  
20

21  
22 Respondents' pack perceptions and responses to health warnings might also possibly be  
23  
24 influenced by the timing of their interview in terms of variations in anti-smoking advertising  
25  
26 activity, changes in the costliness of cigarettes, or shifting social norms. Respondents' level  
27  
28 of exposure to anti-smoking advertising in the three months prior to their interview was  
29  
30 measured in terms of Target Audience Ratings Points (TARPs). TARPs are a product of the  
31  
32 percentage of the target audience exposed to an advertisement (reach) and the average  
33  
34 number of times a target audience member would be exposed (frequency). Hence, 200  
35  
36 TARPs might represent 100% of the target audience receiving the message an average of two  
37  
38 times over a specified period, or 50% reached four times. Exposure to advertising over a 3-  
39  
40 month period was chosen based on previous research suggesting that advertising effects occur  
41  
42 within this time frame.<sup>22, 23</sup> We ascertained TARPs for each of the advertisements broadcast  
43  
44 in NSW during the study period based on OZTAM Australian TV Audience Measurements  
45  
46 for adults aged 18years and older for free-to-air and cable TV ( $M=1590$ ,  $SD=758$ ).<sup>24</sup>  
47  
48  
49  
50

51  
52 A variable indicating cigarette costliness<sup>25</sup> at time of interview was calculated as the ratio of  
53  
54 the average quarterly recommended retail pack price of the 2 top-selling Australian cigarette  
55  
56  
57  
58  
59  
60

1  
2  
3 brands (obtained from the retail trade magazine *Australian Retail Tobacconist*, volumes 65 to  
4  
5 87) to the average weekly earnings in the same quarter ( $M=1.54$ ,  $SD=0.17$ ).<sup>26</sup>  
6

7  
8 The influence of changing social norms was accounted for by statistically accounting for a  
9  
10 time-based trend in the data, described below.  
11

### 12 13 14 **Statistical analyses**

15  
16 Two approaches to statistical analysis were used to assess the impact of the new packs on  
17  
18 each outcome. The first approach used interrupted time series analysis, in which data  
19  
20 collected at multiple instances before and after an intervention is used to detect whether the  
21  
22 intervention has an effect significantly greater than the underlying secular trend. The  
23  
24 advantages of using this approach include the ability to account for background trends,  
25  
26 control for seasonal variations, adjust for auto-correlation in the data (when each value is  
27  
28 correlated with the previous value), and to assess changes in the outcome in the context of  
29  
30 longer-term trends. We also used multiple linear regression analyses to compare the scores  
31  
32 for the two constructed scales in the months prior to and following the new packaging  
33  
34 legislation, controlling for socio-demographic and smoking characteristics.  
35  
36  
37  
38  
39

40  
41 In the time-series analysis, weekly data were aggregated at the monthly level (to ensure  
42  
43 sufficient sample size at each time point). We assessed the impact of the introduction of the  
44  
45 new packs on (a) the proportion of sample strongly agreeing with each of the graphic health  
46  
47 warning statements, (b) mean Graphic Health Warning Impact score, (c) the proportion of the  
48  
49 sample strongly disagreeing with each of the pack perception statements, and (d) mean  
50  
51 Negative Pack Perception score. We used autoregressive integrated moving average  
52  
53 (ARIMA) analysis in SAS version 9.3<sup>27</sup> to model the effects of the introduction of the new  
54  
55 packaging on the outcomes of interest, while accounting for background trends, seasonal  
56  
57  
58  
59  
60



1  
2  
3 variation, the effects of television anti-tobacco advertising, and changes in cigarette  
4  
5 costliness. ARIMA modelling was chosen because the data for each of the outcomes of  
6  
7 interest were auto-correlated.  
8  
9

10  
11 ARIMA modelling comprising model investigation, estimation and diagnostic checking  
12 followed the methods of Box *et al.*<sup>28</sup> This modelling enables investigation of the size and  
13  
14 statistical significance of changes in an outcome after a specified time point, adjusting for  
15  
16 background trends and confounders. An indicator term was created to represent the week of  
17  
18 the introduction of the intervention (the ‘phasing in’ of the new packs on 1 October 2012).  
19  
20 The potential confounders of anti-smoking advertising activity (TARPs) and cigarette  
21  
22 costliness were included in all models. In the models predicting responses to graphic health  
23  
24 warnings, terms indicating the months of December and January were also included to  
25  
26 account for potential for seasonal variations (not included for pack perception outcomes due  
27  
28 to limited data points). Due to the large number of outcomes to be reported, we do not report  
29  
30 the effects of these covariates (available from authors on request).  
31  
32  
33  
34  
35  
36  
37

38  
39 Next, we used multiple linear regression analyses to assess changes in scores on the Graphic  
40  
41 Health Warning Impact and Negative Pack Perception scales, using month of interview as the  
42  
43 indicator, focusing on the period of the introduction of the new packs (August 2012 – May  
44  
45 2013).<sup>29</sup> The months preceding and following the intervention were represented by a five-  
46  
47 level term: (a) the two months preceding the change (August-September, ‘pre-plain packs  
48  
49 (PP)’); (b) the two months of ‘phase-in’ (October-November); (c) the two months ‘immediate  
50  
51 post-PP’ (December-January); (d) ‘3-4 months post-PP’ (February-March); and (e) ‘5-6  
52  
53 months post-PP’ (April-May). Demographic and smoking characteristics were included as  
54  
55 covariates, along with recent anti-smoking advertising activity. Because changes in cigarette  
56  
57  
58  
59  
60

1  
2  
3 costliness were based on quarterly data, there was a high degree of multi-collinearity between  
4  
5 costliness and time of interview (VIF=26), resulting in inflated standard errors and unstable  
6  
7 estimates of regression coefficients. We therefore included a variable indicating 'increase in  
8  
9 cigarette costliness' in the last 12 weeks (as a percentage of costliness) as a covariate in these  
10  
11 models. To provide a point of comparison, these models were also fitted to 2011-2012 data  
12  
13 for the same months. An alpha level of 0.05 was used for all statistical tests. Stata v11 was  
14  
15 used for the regression analyses.<sup>30</sup>  
16  
17  
18  
19

20  
21 Due to a slight over-representation of females, older respondents, and regional residents  
22  
23 (living outside of the capital city) in the CITTS sample compared to the NSW population,<sup>31</sup>  
24  
25 weights were constructed using age, sex, and region of residence to make the sample more  
26  
27 similar to the NSW population. Weights were applied in the multiple linear regression  
28  
29 analyses (using 'p' weights).  
30  
31  
32  
33

## 34 RESULTS

35  
36 Response rate for the survey was an average of 40% in the period 2006-2013.  
37

38 Sample characteristics are shown in Table 1.  
39  
40  
41  
42

### 43 Responses to graphic health warnings

44  
45 Figure 1 shows the monthly proportions of the smoker sample strongly agreeing with each of  
46  
47 the graphic health warning responses over time. In general, strong agreement about the  
48  
49 impact of the warnings had been decreasing since their introduction in 2006. Of smokers  
50  
51 interviewed in 2006: 21% reported strong cognitive responses to the warnings, decreasing to  
52  
53 12% in 2011; and 20% reported strong emotional response, decreasing to 12% in 2011.  
54  
55  
56  
57  
58  
59  
60

1  
2  
3 The results of the interrupted time series analyses investigating the impact of the new  
4 packaging on responses to graphic health warnings are shown in Table 2. For all models, the  
5 residuals were uncorrelated and normally distributed, and all other model diagnostics  
6 indicated suitable model fit. After controlling for background trends, seasonality, anti-  
7 smoking advertising activity and cigarette costliness, there was a significant increase in the  
8 proportion of smokers having strong cognitive, emotional and avoidant responses to graphic  
9 warnings after the introduction of the new packs. The increase in the avoidant response  
10 occurred two months after the new packs were introduced (from 10% in September 2012 to  
11 28% in December), and the increase in cognitive and emotional responses occurred after  
12 three months (cognitive: from 13% in September 2012 to 20% in January 2013; emotional:  
13 from 13% to 27%). In the time-series analysis, the change in the proportion of smokers  
14 strongly agreeing that the warnings were the only thing they noticed on their packs after the  
15 introduction of the new packs was not significant.  
16  
17  
18  
19  
20  
21  
22  
23  
24  
25  
26  
27  
28  
29  
30  
31  
32  
33

34 The monthly average of the GHW Impact scale is shown in Figure 3. The results of the  
35 interrupted time series analysis investigating the impact of the new packaging on GHW  
36 Impact scores are shown in Table 2. The residuals were uncorrelated and normally  
37 distributed, and all other model diagnostics indicated suitable model fit. There was a  
38 significant increase in scores on the GHW Impact scale two months after the introduction of  
39 the new packs, not attributable to background trends, seasonality, anti-smoking advertising  
40 activity or cigarette costliness.  
41  
42  
43  
44  
45  
46  
47  
48  
49  
50  
51

52 The results of the multiple linear regression model predicting scores on the GHW Impact  
53 scale are shown in Table 3. Compared to the pre-plain packaging period (August/September  
54 2012), scores on the scale was significantly higher in immediate post-plain packaging period  
55  
56  
57  
58  
59  
60

1  
2  
3 (December/January) and in the 5-6 month post-plain packaging period (April/May). These  
4  
5 effects were independent of any differences between the samples on socio-demographic or  
6  
7 smoking characteristics, anti-smoking advertising activity, or increases in cigarette costliness.  
8  
9  
10 There were no significant differences in scores on this scale over the months of the  
11  
12 comparison period.

### 13 14 15 16 **Pack perceptions**

17  
18 The monthly proportions of smokers strongly disagreeing with each of the pack attitude items  
19  
20 are shown in Figure 2. The results of the interrupted time series analysis (Table 2) show that,  
21  
22 three months following the introduction of the new packs, there was a significant increase in  
23  
24 the proportion of smokers strongly disagreeing that the look of their cigarette pack is  
25  
26 attractive (from 26% in September 2012 to 80% in January 2013), says something good about  
27  
28 them (from 27% to 76%), influences the brand they buy (from 27% to 77%), makes their  
29  
30 brand stand out (from 22% to 78%), is fashionable (from 27% to 80%), and matches their  
31  
32 style (from 31% to 77%). This effect was independent of any influence of long-term  
33  
34 background trends, cigarette costliness, or anti-smoking advertising activity.  
35  
36  
37  
38  
39

40  
41 The monthly average of the Negative Pack Perception scale is shown in Figure 3, and the  
42  
43 results of the interrupted time series analysis investigating the impact of the new packaging  
44  
45 on these scores are shown in Table 2. The residuals were uncorrelated and normally  
46  
47 distributed, and all other model diagnostics indicated suitable model fit. There was a  
48  
49 significant increase in scores on the Negative Pack Perception scale three months after the  
50  
51 introduction of the new packs, not attributable to background trends, seasonality, anti-  
52  
53 smoking advertising activity or cigarette costliness.  
54  
55  
56  
57  
58  
59  
60

1  
2  
3 The multiple linear regression model predicting Negative Pack Perception scores over the pp-  
4  
5 periods showed that scores on this scale were significantly higher in each of the post-pp  
6  
7 periods than in the pre-pp period (Table 3). For the comparison period, there were no  
8  
9 significant differences in scores on this scale.  
10

## 11 12 13 14 **DISCUSSION**

15  
16 To our knowledge, this is the first study to examine the population-level impact of the new  
17  
18 tobacco plain packs on Australian adult smokers' responses to their packs. This is an  
19  
20 important first step in evaluating the policy as these outcomes relate closely to the intended  
21  
22 purpose of the legislation. In the months following the introduction of the new packs, there  
23  
24 was an increase in the proportion of smokers reporting strong cognitive and emotional  
25  
26 responses to the warnings, avoidant behaviours related to the on-pack warnings, and salience  
27  
28 of warnings. There was also an increase in the proportion of smokers with strong negative  
29  
30 perceptions about their packs. These changes were not attributed to variations in exposure to  
31  
32 anti-smoking advertising activity, tobacco prices, secular trends, seasonality or changes in  
33  
34 sample composition.  
35  
36  
37  
38  
39  
40

41 Consistent with the results of experimental research,<sup>14, 15, 17</sup> we found that the introduction of  
42  
43 the new packs was associated with an increase in the salience and the self-reported impact of  
44  
45 the health warnings, such that smokers were more likely to report that the warnings are the  
46  
47 only thing they see on their packs, that they feel they should hide or cover their pack, that the  
48  
49 warnings encourage them to stop smoking, and that they make them worry that they  
50  
51 shouldn't be smoking. Prominent graphic health warnings on tobacco products have been  
52  
53 shown to increase health knowledge and perceptions of risk from smoking,<sup>32, 33</sup> reduce  
54  
55  
56  
57  
58  
59  
60

1  
2  
3 consumption levels and increase cessation behaviour among smokers,<sup>33, 34</sup> and support former  
4 smokers in remaining abstinent.<sup>35</sup> Importantly, the impact of graphic health warnings on  
5 smoking behaviours appears to be a function of the depth of smokers' cognitive processing of  
6 and responses to the warnings (such as those monitored in the current study),<sup>34-36</sup> suggesting  
7 that if plain packaging can intensify smokers' responses to warnings, flow-on effects on  
8 consumption and quitting are likely.

9  
10  
11  
12  
13  
14  
15  
16  
17  
18 Research shows that the impact of pictorial health warnings declines over time.<sup>33 37</sup> Of note is  
19 the fact that the introduction of the new packs appears to have reversed a downward trend in  
20 smokers' cognitive, emotional, and avoidant responses to the graphic health warnings that  
21 had been occurring since their initial introduction. On the current plain packaging, the  
22 warnings are having an equal or greater impact on adult smokers than they have since their  
23 inception. Due to the simultaneous introduction of the plain packs and changes in the size and  
24 content of the warnings themselves, the relative contribution of the warning and pack changes  
25 to this increase in smoker responses cannot be determined in this study. Nonetheless, recent  
26 evidence from eye-tracking studies suggests that plain packing itself can increase visual  
27 attention towards warning information on cigarette packs.<sup>38, 39</sup> Future research should assess  
28 whether the downward trend in responses to health warnings resumes following the  
29 introductory period of plain packaging.

30  
31  
32  
33  
34  
35  
36  
37  
38  
39  
40  
41  
42  
43  
44  
45  
46  
47 Extending experimental evidence on the influence of plain packaging on brand appeal,<sup>7-9, 40</sup>  
48 the current study demonstrates an impact of the new packs on adult smokers' perceptions that  
49 their own packs are fashionable or attractive, that they match their style or say something  
50 good about them to other smokers, or that the pack makes their brand stand out or influences  
51 the brand they buy. There is a wide body of evidence from marketing literature that shows

1  
2  
3 how branding and packaging can modify the expected and actual subjective experience of  
4 products.<sup>41</sup> Notably, changes in the way smokers perceive their pack have the potential to  
5 augment smokers' subjective experience of smoking, leading to a more negative perception  
6 of the taste of their cigarettes and less enjoyment in the act of smoking.<sup>7</sup> Indeed, anecdotal  
7 evidence suggests that Australian smokers reported their cigarettes tasted worse with the  
8 introduction of plain packaging,<sup>42,43</sup> and smokers smoking from plain packs during the  
9 phase-in period perceived their cigarettes to be less satisfying and lower in quality than a year  
10 ago.<sup>2</sup> The likely impact of changes in the perceived experience of smoking is an important  
11 avenue for future studies, but research identifying enjoyment of smoking as a barrier to  
12 quitting suggests that smokers who find smoking their less enjoyable might be more likely to  
13 try and quit.<sup>44</sup>

14  
15  
16  
17  
18  
19  
20  
21  
22  
23  
24  
25  
26  
27  
28  
29  
30 The temporal pattern of changes found in this study is consistent with other early evaluations  
31 of the impact of the new plain packs. The proportion of smokers reporting negative responses  
32 to their packs and the warnings on them increased throughout the phase-in period,  
33 corresponding to the increasing proportion of plain packs observed in public venues during  
34 that period,<sup>45</sup> and the number of smokers reporting to be smoking from plain packs.<sup>2</sup> The  
35 earliest effects of the new packs have been detected during this phase-in period, with declines  
36 in rates of active smoking observed in outdoor dining venues in October-November,<sup>45</sup> and  
37 calls to a cessation helpline peaking in November.<sup>19</sup> From the current time-series analysis,  
38 smokers' tendency to avoid the on-pack health warnings increased significantly in December,  
39 two months after the plain packs started appearing, when plain packs became mandatory for  
40 sale. This coincides with an observed decline in rates of pack display and an increase in  
41 concealment of packs in outdoor venues.<sup>45</sup> Other changes observed in the current study  
42 (cognitive and emotional responses to graphic health warnings, and negative pack  
43  
44  
45  
46  
47  
48  
49  
50  
51  
52  
53  
54  
55  
56  
57  
58  
59  
60

1  
2  
3 perceptions) reached significance in January, at a time when less than 5% of packs observed  
4  
5 in outdoor venues were fully-branded.<sup>45</sup> These changes occurred just after an increase in the  
6  
7 number of smokers rating their cigarettes as being lower in quality and less satisfying than  
8  
9 one year ago.<sup>2</sup> All changes in pack-related responses observed in the current study were  
10  
11 maintained at eight months after the first appearance of the new packs, the last data point in  
12  
13 the current series.  
14  
15

16  
17  
18 The strengths of this study include the use of population-level data collected over a long time  
19  
20 period, resulting in a large sample of adult smokers. As recommended in a recent review of  
21  
22 the plain packaging literature,<sup>5</sup> the use of a time-series approach with multiple data points  
23  
24 before the intervention increased the power to detect any effects over and above long-term  
25  
26 background and seasonal trends, and the inclusion of important time-related potential  
27  
28 covariates decreased threats to the validity of the findings. The regression analyses allowed  
29  
30 us to control for any changes in sample composition in regards to demographic characteristics  
31  
32 such as SES and smoking levels. We note that the sample for this study consisted of current  
33  
34 smokers only, and therefore any smokers who quit in the post-plain packaging period would  
35  
36 be excluded. This might have resulted in a sample of smokers somewhat resistant to this  
37  
38 intervention, and as such, the estimates provided in this study might be more conservative  
39  
40 than if we had also surveyed smokers who quit during this time.  
41  
42  
43  
44  
45  
46

47  
48 Limitations of the study include the use of landline-only telephone numbers and a somewhat  
49  
50 low response rate, possibly leading to some bias in sample composition. The rate of mobile-  
51  
52 only households in Australia, recently estimated at 19%, increased over the years of this  
53  
54 study.<sup>46</sup> Recent dual-frame surveys have shown that samples recruited via mobile-phone are  
55  
56 more likely to include younger respondents and males than landline samples.<sup>47</sup> The impact of  
57  
58



1  
2  
3 these demographic differences are likely to be reduced in the current study due to the  
4  
5 inclusion of age and gender as covariates, the use of data weighted for these variables where  
6  
7 appropriate, and the inclusion of smoking-related covariates related to these demographic  
8  
9 characteristics. The response rate of CITTTS is similar to that of other population telephone  
10  
11 surveys on tobacco use in Australia,<sup>48</sup> and was consistent across the study period, limiting its  
12  
13 influence on the observed pattern of results.  
14  
15

16  
17  
18 In an environment of strict tobacco promotion prohibition such as Australia, cigarette  
19  
20 packaging had become the key tool used by the tobacco industry to attract and retain  
21  
22 customers.<sup>49, 50</sup> The purpose of the plain packaging legislation was to deprive tobacco  
23  
24 companies of an ongoing opportunity to promote their products in the community. The  
25  
26 introductory effects of the plain packaging legislation observed in this study are consistent  
27  
28 with the specific objectives of the legislation in regards to increasing the salience and impact  
29  
30 of health warnings, and reducing the promotional appeal of tobacco packaging. Due to the  
31  
32 fact that tobacco packs are handled every time a smoker takes out a cigarette, those who  
33  
34 smoke more than a pack per day were potentially exposed to their new packs almost 4,000  
35  
36 times in the first six months of the legislated changes. The findings of this study suggest that  
37  
38 the new packs are decreasing smokers' identification with their packs and making them think  
39  
40 more closely about the health warnings contained on them, potentially moving them closer to  
41  
42 cessation. Future research should extend this study by considering any relationships between  
43  
44 smokers' responses to their plain packaging packs and changes in smoking behaviours,  
45  
46 investigating whether the introductory effects identified in this study were apparent in youth  
47  
48 smokers, and monitoring the impact of plain packaging on perceptions about smoking among  
49  
50 non-smoking youth and adults.  
51  
52  
53  
54  
55  
56  
57  
58  
59  
60

## **COPYRIGHT**

The Corresponding Author (SD) has the right to grant on behalf of all authors and does grant on behalf of all authors, an exclusive licence on a worldwide basis to the BMJ Publishing Group Ltd to permit this article (if accepted) to be published in BMJ editions and any other BMJ PGL products and sub-licences such use and exploit all subsidiary rights, as set out in our licence.

## **COMPETING INTERESTS**

SD, TD, JY, DP, DC have completed the Unified Competing Interest form at [www.icmje.org/coi\\_disclosure.pdf](http://www.icmje.org/coi_disclosure.pdf) (available on request from the corresponding author) and declare (1) no support from any third party organisation for the submitted work; (2) no financial relationships with any company that might have an interest in the submitted work in the previous three years; (3) their spouses, partners, or children have no financial relationships that may be relevant to the submitted work; and (4) all authors have no non-financial interests that may be relevant to the submitted work.

## **CONTRIBUTORSHIP STATEMENT**

SD, DP and JY conceived the study. DP and SD acquired the data. SD searched the literature and extracted the data. TD and SD did the analyses. All authors interpreted the data. SD drafted the manuscript. TD, JY, DP and DC contributed to the initial revision of the manuscript. SD, TD, JY, DP and DC contributed to the critical revision of the manuscript before publication. SD is the guarantor. All authors had full access to all of the data in the study and take responsibility for the integrity of the data and the accuracy of the data analysis.

**TRANSPERANCY**

SD affirms that the manuscript is an honest, accurate, and transparent account of the study being reported; that no important aspects of the study have been omitted; and that any discrepancies from the study as planned have been explained.

**ETHICS APPROVAL**

The CITTS has ethics approval from the NSW Population Health Services Research Ethics Committee (HREC/10/CIPHS/13). All respondents gave informed consent before taking part in the study.

**FUNDING**

This study was internally funded by the Cancer Institute NSW.

**DATA SHARING**

No additional data available.

**FIGURE LEGENDS**

Figure 1: Monthly proportions of smokers strongly agreeing that: (a) the graphic warnings encourage me to stop smoking (cognitive response); (b) with the graphic warnings, each time I get a cigarette out I worry that I shouldn't be smoking (emotional response); (c) they make me feel that I should hide or cover my packet from the view of others (avoidant response); (d) the only thing I notice on my cigarette pack is the graphic warnings (warning salience)

Figure 2: Monthly proportions of smokers strongly disagreeing that their cigarette pack is: (a) attractive; (b) says something good about me to other smokers; (c) influences the brand I buy; (d) makes my brand stand out from other brands; (e) is fashionable; (f) matches my style

Figure 3: Monthly mean score for Graphic Health Warning Impact and Negative Pack Perception

**REFERENCES**

1. Tobacco Plain Packaging Act 2011 (No. 148, 2011), Australian Commonwealth Government(2011).
2. Wakefield M, Hayes L, Durkin S, Borland R. Introduction effects of the Australian plain packaging policy on adult smokers: a cross-sectional study. *BMJ Open*. 2013;3:e003175.
3. Stead M, Moodie C, Angus K, Bauld L, McNeill A, Thomas J, et al. Is consumer response to plain/standardised tobacco packaging consistent with framework convention on tobacco control guidelines? A systematic review of quantitative studies. *PLoS One*. 2013;8(10):e75919.
4. Quit Victoria CCV. Plain packaging of tobacco products: a review of the evidence. Melbourne: Cancer Council Australia, <http://www.cancervic.org.au/plainfacts/browse.asp?ContainerID=plainfacts-evidence>, 2011.
5. Moodie C, Stead M, Bauld L, McNeill A, Angus K, Hinds K, et al. Plain Tobacco Packaging: A Systematic Review. Available: [http://phrc.lshtm.ac.uk/papers/PHRC\\_006\\_Final\\_Report.pdf](http://phrc.lshtm.ac.uk/papers/PHRC_006_Final_Report.pdf). Accessed 2014 April 10. University of Stirling, 2012.
6. Hammond D. "Plain packaging" regulations for tobacco products: the impact of standardizing the color and design of cigarette packs. *Salud Publica Mex*. 2010;52 Suppl 2:S226-32.
7. Wakefield M, Germain D, Durkin S. How does increasingly plainer cigarette packaging influence adult smokers' perceptions about brand image? An experimental study. *Tob Control*. 2008;17:416-21.

- 1  
2  
3 8. Wakefield M, Germain D, Durkin S, Hammond D, Goldberg M, Borland R. Do larger  
4 pictorial health warnings diminish the need for plain packaging of cigarettes? *Addiction*.  
5  
6 2012;107(6):1159-67.  
7
- 8  
9 9. Germain D, Wakefield MA, Durkin SJ. Adolescents' perceptions of cigarette brand  
10 image: does plain packaging make a difference? *J Adolesc Health*. 2010;46(4):385-92.  
11
- 12 10. Hammond D, Daniel S, White CM. The effect of cigarette branding and plain  
13 packaging on female youth in the United Kingdom. *J Adolesc Health*. 2013;52(2):151-7.  
14
- 15 11. Gallopel-Morvan K, Moodie C, Hammond D, Eker F, Beguinot E, Martinet Y.  
16  
17 Consumer perceptions of cigarette pack design in France: a comparison of regular, limited  
18 edition and plain packaging. *Tob Control*. 2012;21(5):502-6.  
19
- 20 12. Moodie C, Ford A, Mackintosh AM, Hastings G. Young people's perceptions of  
21 cigarette packaging and plain packaging: an online survey. *Nicotine Tob Res*. 2012;14(1):98-  
22 105.  
23
- 24 13. Scheffels J, Lund I. The impact of cigarette branding and plain packaging on  
25 perceptions of product appeal and risk among young adults in Norway: A between-subjects  
26 experimental survey. *BMJ Open*. 2013;3(12):e003732.  
27
- 28 14. McCool J, Webb L, Cameron LD, Hoek J. Graphic warning labels on plain cigarette  
29 packs: Will they make a difference to adolescents? *Soc Sci Med*. 2012;74:1269-73.  
30
- 31 15. Goldberg ME, Liefeld J, Madill J, Vredenburg H. The effect of plain packaging on  
32 response to health warnings. *Am J Public Health*. 1999;89(9):1434-5.  
33
- 34 16. Freeman B, Chapman S, Rimmer M. The case of plain packaging of tobacco products.  
35  
36 *Addiction*. 2008;103:580-90.  
37
- 38 17. Moodie C, Mackintosh AM, Hastings G, Ford A. Young adult smokers' perceptions  
39 of plain packaging: a pilot naturalistic study. *Tob Control*. 2011;20(5):367-73.  
40  
41  
42  
43  
44  
45  
46  
47  
48  
49  
50  
51  
52  
53  
54  
55  
56  
57  
58  
59  
60

- 1  
2  
3 18. Moodie CS, Mackintosh AM. Young adult women smokers' response to using plain  
4 cigarette packaging: a naturalistic approach. *BMJ Open*. 2013;3(3).  
5  
6  
7 19. Young J, Stacey I, Dobbins T, Dunlop S, Dessaix A, Currow D. The association  
8 between tobacco plain packaging and Quitline calls: a population-based, interrupted time  
9 series analysis. *Med J Aust*. 2014;200(1):29-32.  
10  
11  
12 20. American Association for Public Opinion Research. Standard definitions: final  
13 dispositions of case codes and outcome rates for surveys. Lenexa, Kansas: AAPOR; 2008.  
14  
15  
16 21. Wakefield MA, Bowe SJ, Durkin SJ, Yong HH, Spittal MJ, Simpson JA, et al. Does  
17 tobacco-control mass media campaign exposure prevent relapse among recent quitters?  
18 *Nicotine Tob Res*. 2013;15(2):385-92.  
19  
20  
21 22. Wakefield M, Spittal MJ, Yong HH, Durkin SJ, Borland R. Effects of mass media  
22 campaign exposure intensity and durability on quit attempts in a population-based cohort  
23 study. *Health Educ Res*. 2011;26(6):988-97.  
24  
25  
26 23. Dunlop S, Perez D, Cotter T, Wakefield M. Televised Antismoking Advertising:  
27 Effects of Level and Duration of Exposure. *Am J Public Health*. 2013;103(8):e66-e73.  
28  
29  
30 24. OzTAM. Weekly TARP data for all television markets in NSW, Australia, 2005-  
31 2013. Prepared for The Cancer Institute NSW. . North Sydney, Australia: OzTAM Pty Ltd  
32  
33  
34 25. Wakefield M, Durkin S, Spittal M, Siahpush M, Scollo M, Simpson JA, et al. Impact  
35 of tobacco control policies and mass media campaigns on monthly adult smoking prevalence.  
36 *Am J Public Health*. 2008;98:1443-50.  
37  
38  
39 26. Australian Bureau of Statistics. Average Weekly Earnings. Canberra, Australia:  
40 Australian Bureau of Statistics, 2013.  
41  
42  
43 27. SAS Institute Inc. SAS version 9.3. Cary, NC2011.  
44  
45  
46 28. Box GEP, Jenkins GM, Reinsel GC. Time series analysis: Forecasting and control  
47 (4th ed.). Hoboken, NJ: John Wiley & Sons 2008.  
48  
49  
50  
51  
52  
53  
54  
55  
56  
57  
58  
59  
60

- 1  
2  
3 29. Cohen J, Cohen P, West S, Aiken LS. Applied Multiple Regression/Correlation  
4 Analysis for the Behavioral Sciences (3rd ed.). Mahwah, NJ: Erlbaum; 2003.  
5  
6  
7 30. StataCorp. Stata v11.1 Texas, USA: 2009.  
8  
9  
10 31. Australian Bureau of Statistics. Population by age and sex, Australian states and  
11 territories, June 2006. Canberra: Australian Bureau of Statistics, 2007 Contract No.: cat no.  
12 3201.0.  
13  
14  
15 32. Miller CL, Hill DJ, Quester PG, Hiller JE. Response of mass media, tobacco industry  
16 and smokers to the introduction of graphic cigarette pack warnings in Australia. *Eur J Public*  
17 *Health*. 2009;19(6):644-9.  
18  
19  
20 33. Hammond D. Health warning messages on tobacco products: a review. *Tob Control*.  
21 2011;20(5):327-37.  
22  
23  
24 34. Borland R, Yong HH, Wilson N, Fong GT, Hammond D, Cummings KM, et al. How  
25 reactions to cigarette packet health warnings influence quitting: findings from the ITC Four-  
26 Country survey. *Addiction*. 2009;104(4):669-75.  
27  
28  
29 35. Partos TR, Borland R, Yong HH, Thrasher J, Hammond D. Cigarette packet warning  
30 labels can prevent relapse: findings from the International Tobacco Control 4-Country policy  
31 evaluation cohort study. *Tob Control*. 2012.  
32  
33  
34 36. Yong HH, Borland R, Thrasher JF, Thompson ME, Nagelhout GE, Fong GT, et al.  
35 Mediation Pathways of the Impact of Cigarette Warning Labels on Quit Attempts. *Health*  
36 *Psychol*. 2014.  
37  
38  
39 37. Borland R, Wilson N, Fong GT, Hammond D, Cummings KM, Yong HH, et al.  
40 Impact of graphic and text warnings on cigarette packs: findings from four countries over five  
41 years. *Tob Control*. 2009;18(5):358-64.  
42  
43  
44 38. Maynard OM, Munafo MR, Leonards U. Visual attention to health warnings on plain  
45 tobacco packaging in adolescent smokers and non-smokers. *Addiction*. 2013;108(2):413-9.  
46  
47  
48  
49  
50  
51  
52  
53  
54  
55  
56  
57  
58  
59  
60



- 1  
2  
3 39. Munafo MR, Roberts N, Bauld L, Leonards U. Plain packaging increases visual  
4  
5 attention to health warnings on cigarette packs in non-smokers and weekly smokers but not  
6  
7 daily smokers. *Addiction*. 2011;106(8):1505-10.  
8  
9  
10 40. Goldberg ME, Kindra G, Lefebvre J, Tribu L, Liefeld J, Madill-Marshall J, et al.  
11  
12 When packages can't speak: possible impacts of plain and generic packaging of tobacco  
13  
14 products. Expert panel report prepared at the request of Health Canada, 1995 Contract No.:  
15  
16 521716345/6771.  
17  
18 41. Wakefield M. Welcome to cardboard country: how plain packaging could change the  
19  
20 subjective experience of smoking. *Tob Control*. 2011;20(5):321-2.  
21  
22  
23 42. Dunlevy S, Stark P. Plain packaging leaves bad taste in smokers' mouths. *Herald Sun*  
24  
25 30 November 2012.  
26  
27 43. Hagan K, Harrison D. Plain packs 'put off' smokers. *The Age* 30, November 2012.  
28  
29 44. Hyland A, Borland R, Li Q, Yong HH, McNeill A, Fong GT, et al. Individual-level  
30  
31 predictors of cessation behaviours among participants in the International Tobacco Control  
32  
33 (ITC) Four Country Survey. *Tob Control*. 2006;15 Suppl 3:iii83-94.  
34  
35  
36 45. Zacher M, Bayly M, Brennan E, Dono J, Miller C, Durkin S, et al. Personal tobacco  
37  
38 pack display before and after the introduction of plain packaging with larger pictorial health  
39  
40 warnings in Australia: an observational study of outdoor café strips. *Addiction*.  
41  
42 2014;109(4):653-62.  
43  
44  
45 46. Australian Communications and Media Authority (ACMA). Communications report  
46  
47 2010-11 series: Report 2 - Converging communications channels: Preferences and behaviours  
48  
49 of Australian communications users. ACMA, 2011.  
50  
51  
52 47. Barr ML, van Ritten JJ, Steel DG, Thackway SV. Inclusion of mobile phone numbers  
53  
54 into an ongoing population health survey in New South Wales, Australia: design, methods,  
55  
56 call outcomes, costs and sample representativeness. *BMC Med Res Methodol*. 2012;12:177.  
57  
58  
59  
60

- 1  
2  
3 48. Thompson ME, Fong GT, Hammond D, Boudreau C, Driezen P, Hyland A, et al.  
4  
5 Methods of the International Tobacco Control (ITC) Four Country Survey. Tob Control.  
6  
7 2006;15(Suppl 3):iii12-iii8.  
8  
9  
10 49. Wakefield M, Morley C, Horan JK, Cummings KM. The cigarette pack as image:  
11  
12 new evidence from tobacco industry documents. Tob Control. 2002;11(Suppl I):i73-i80.  
13  
14 50. Carter SM. The Australian cigarette brand as product, person, and symbol. Tob  
15  
16 Control. 2003;12 Suppl 3:iii79-86.  
17  
18  
19  
20  
21  
22  
23  
24  
25  
26  
27  
28  
29  
30  
31  
32  
33  
34  
35  
36  
37  
38  
39  
40  
41  
42  
43  
44  
45  
46  
47  
48  
49  
50  
51  
52  
53  
54  
55  
56  
57  
58  
59  
60

Table 1. Sample characteristics from the Cancer Institute's Tobacco Tracking Survey (CITTS) April 2006-May 2012 (smokers only;  $n=15,745$ )

|                                  | <i>N</i> | %  |
|----------------------------------|----------|----|
| <b>Sex:</b>                      |          |    |
| Female                           | 8298     | 50 |
| Male                             | 7503     | 50 |
| <b>Age:</b>                      |          |    |
| 18-29 yrs                        | 2405     | 21 |
| 30-55 yrs                        | 8470     | 48 |
| 55+ yrs                          | 4924     | 31 |
| <b>Socio-Economic Status</b>     |          |    |
| Low                              | 6577     | 41 |
| Mod                              | 4071     | 27 |
| High                             | 4974     | 33 |
| <b>Smoking Frequency</b>         |          |    |
| Daily                            | 14025    | 88 |
| Weekly                           | 950      | 6  |
| Less than weekly                 | 826      | 6  |
| <b>Smoking</b>                   |          |    |
| Low                              | 5827     | 41 |
| Mod                              | 5837     | 38 |
| High                             | 3473     | 22 |
| <b>Quit Attempts in Past 12m</b> |          |    |
| None                             | 9443     | 60 |
| At least one                     | 6145     | 40 |
| <b>Year:</b>                     |          |    |
| 2006                             | 1600     | 10 |
| 2007                             | 2289     | 15 |
| 2008                             | 2094     | 13 |
| 2009                             | 2135     | 14 |
| 2010                             | 2146     | 14 |
| 2011                             | 2157     | 14 |
| 2012                             | 2126     | 13 |
| 2013                             | 1254     | 8  |

Notes. *N*s are unweighted, %s are weighted for age, sex, and regional residence

Table 2. Results of interrupted time series analyses investigating the impact of new tobacco packaging on smokers' responses to graphic health warnings and pack attitudes

|                                                     |                                           | <b>Increase in %<br/>strongly agree<br/>(95% CI)</b>    | <b>P</b> |
|-----------------------------------------------------|-------------------------------------------|---------------------------------------------------------|----------|
| <b>Responses to<br/>graphic health<br/>warnings</b> | Cognitive <sup>a</sup>                    | 9.8 (3.0, 16.5)                                         | 0.005    |
|                                                     | Emotional <sup>a</sup>                    | 8.6 (1.7, 15.4)                                         | 0.010    |
|                                                     | Avoidant <sup>b</sup>                     | 9.8 (4.2, 15.3)                                         | <0.001   |
|                                                     | Warning Salience <sup>c</sup>             | 2.5 (-10.1, 15.1)                                       | 0.700    |
|                                                     | GHW Impact <sup>c</sup>                   | 0.38 (0.05, 0.70) <sup>d</sup>                          | 0.02     |
|                                                     |                                           | <b>Increase in %<br/>strongly disagree<br/>(95% CI)</b> |          |
| <b>Pack perceptions</b>                             | Attractive <sup>c</sup>                   | 57.5 (38.0, 77.1)                                       | <0.001   |
|                                                     | Says something good about me <sup>c</sup> | 54.5 (36.9, 72.1)                                       | <0.001   |
|                                                     | Influences the brand I buy <sup>c</sup>   | 40.6 (23.2, 58.0)                                       | <0.001   |
|                                                     | Makes my brand stand out <sup>c</sup>     | 55.6 (35.0, 76.2)                                       | <0.001   |
|                                                     | Is fashionable <sup>c</sup>               | 44.7 (28.1, 61.2)                                       | <0.001   |
|                                                     | Matches my style <sup>c</sup>             | 48.1 (32.2, 64.0)                                       | <0.001   |
|                                                     | Negative Pack Perceptions <sup>c</sup>    | 0.21 (0.02, 0.40) <sup>d</sup>                          | 0.03     |

Notes. All models adjusted for TARPs, cigarette costliness, and seasonal variations (where possible); full results available from authors on request; all effects occurred at 3-months lag, except for 'avoidant' responses to the graphic health warnings and GHW Impact (2-month lag); <sup>a</sup> Data available April 2006 – May 2013; <sup>b</sup> Data available April 2007 – May 2013; <sup>c</sup> Data available October 2011 – May 2013; <sup>d</sup> Increase in Mean score

Table 3. Results from linear regression models predicting Graphic Health Warning Impact and Negative Pack Perceptions from month of interview in the plain packaging and comparison periods

|                                  |               | Comparison period<br>(2011-2012) |        |         |          |      | Plain packaging period<br>(2012-2013) |        |        |         |          |       |        |
|----------------------------------|---------------|----------------------------------|--------|---------|----------|------|---------------------------------------|--------|--------|---------|----------|-------|--------|
|                                  |               | M                                | (SD)   | $\beta$ | 95% C.I. |      | p                                     | M      | (SD)   | $\beta$ | 95% C.I. |       | p      |
| <b>GHW Impact</b>                | <b>Month:</b> |                                  |        |         |          |      |                                       |        |        |         |          |       |        |
|                                  | Aug/Sept      | n/a                              |        |         |          |      | 2.67                                  | (0.93) | Ref    |         |          |       |        |
|                                  | Oct/Nov       | 2.57                             | (0.90) | Ref     |          |      | 2.75                                  | (0.97) | 0.00   | -0.16   | 0.18     | 0.932 |        |
|                                  | Dec/Jan       | 2.62                             | (0.99) | -0.01   | -0.25    | 0.21 | 0.847                                 | 2.88   | (1.16) | 0.09    | 0.07     | 0.46  | 0.008  |
|                                  | Feb/March     | 2.77                             | (0.89) | 0.10    | -0.19    | 0.58 | 0.323                                 | 2.75   | (1.15) | 0.07    | -0.04    | 0.39  | 0.110  |
|                                  | April/May     | 2.67                             | (0.96) | -0.01   | -0.52    | 0.48 | 0.930                                 | 2.85   | (1.21) | 0.06    | 0.01     | 0.34  | 0.043  |
| <b>Negative Pack Perceptions</b> | <b>Month:</b> |                                  |        |         |          |      |                                       |        |        |         |          |       |        |
|                                  | Aug/Sept      | n/a                              |        |         |          |      | 3.95                                  | (0.76) | Ref    |         |          |       |        |
|                                  | Oct/Nov       | 4.03                             | (0.60) | Ref     |          |      | 3.96                                  | (0.75) | 0.02   | -0.47   | 1.06     | 0.449 |        |
|                                  | Dec/Jan       | 4.11                             | (0.64) | 0.06    | -0.43    | 1.46 | 0.286                                 | 4.50   | (0.63) | 0.27    | 2.74     | 4.18  | <0.001 |
|                                  | Feb/March     | 4.08                             | (0.59) | 0.03    | -1.40    | 1.88 | 0.775                                 | 4.58   | (0.61) | 0.37    | 3.14     | 4.75  | <0.001 |
|                                  | April/May     | 4.03                             | (0.69) | 0.07    | -1.61    | 2.80 | 0.598                                 | 4.64   | (0.63) | 0.40    | 3.87     | 5.21  | <0.001 |

Notes. GHW=Graphic Health Warnings; M=Mean (range 1-5); SD=Standard Deviation;  $\beta$ =standardised coefficient; C.I.=95% Confidence

Interval; models controlled for demographics (sex, age, SES), smoking characteristics (frequency and level of smoking, 12m quitting history), anti-smoking advertising activity (TARPs), and recent increases in cigarette costliness (% increase in past 12 weeks); M's and SD's are unweighted.

1  
2  
3  
4  
5  
6  
7  
8  
9  
10  
11  
12  
13  
14  
15  
16  
17  
18  
19  
20  
21  
22  
23  
24  
25  
26  
27  
28  
29  
30  
31  
32  
33  
34  
35  
36  
37  
38  
39  
40  
41  
42  
43  
44  
45  
46  
47  
48  
49

For peer review only

1  
2  
3  
4  
5  
6  
7  
8  
9  
10  
11  
12  
13  
14  
15  
16  
17  
18  
19  
20  
21  
22  
23  
24  
25  
26  
27  
28  
29  
30  
31  
32  
33  
34  
35  
36  
37  
38  
39  
40  
41  
42  
43  
44  
45  
46  
47  
48  
49  
50  
51  
52  
53  
54  
55  
56  
57  
58  
59  
60

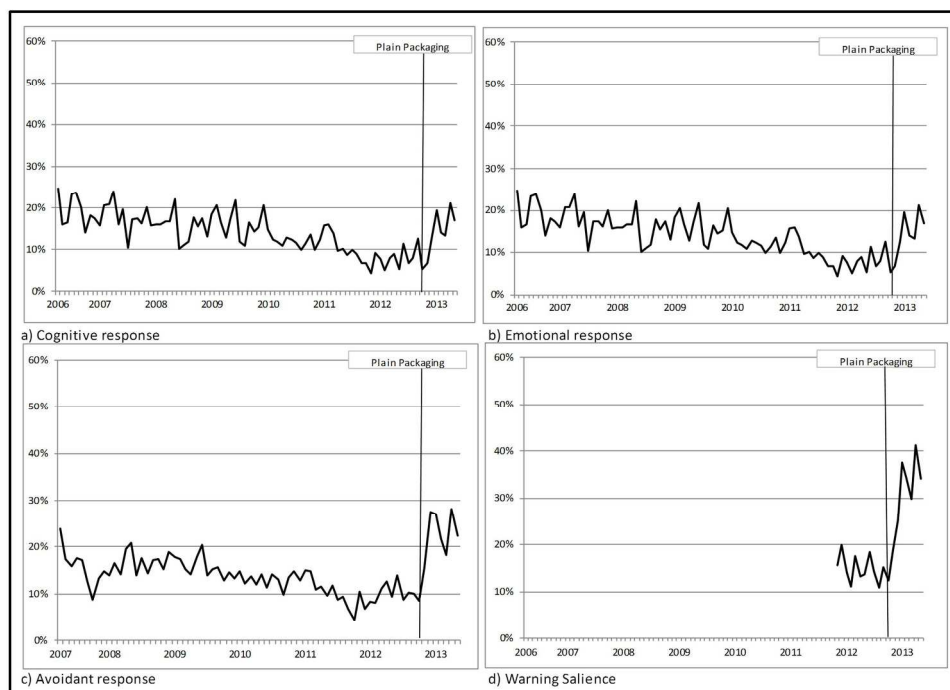

Figure 1: Monthly proportions of smokers strongly agreeing that: (a) the graphic warnings encourage me to stop smoking (cognitive response); (b) with the graphic warnings, each time I get a cigarette out I worry that I shouldn't be smoking (emotional response); (c) they make me feel that I should hide or cover my packet from the view of others (avoidant response); (d) the only thing I notice on my cigarette pack is the graphic warnings (warning salience)  
254x190mm (300 x 300 DPI)

1  
2  
3  
4  
5  
6  
7  
8  
9  
10  
11  
12  
13  
14  
15  
16  
17  
18  
19  
20  
21  
22  
23  
24  
25  
26  
27  
28  
29  
30  
31  
32  
33  
34  
35  
36  
37  
38  
39  
40  
41  
42  
43  
44  
45  
46  
47  
48  
49  
50  
51  
52  
53  
54  
55  
56  
57  
58  
59  
60

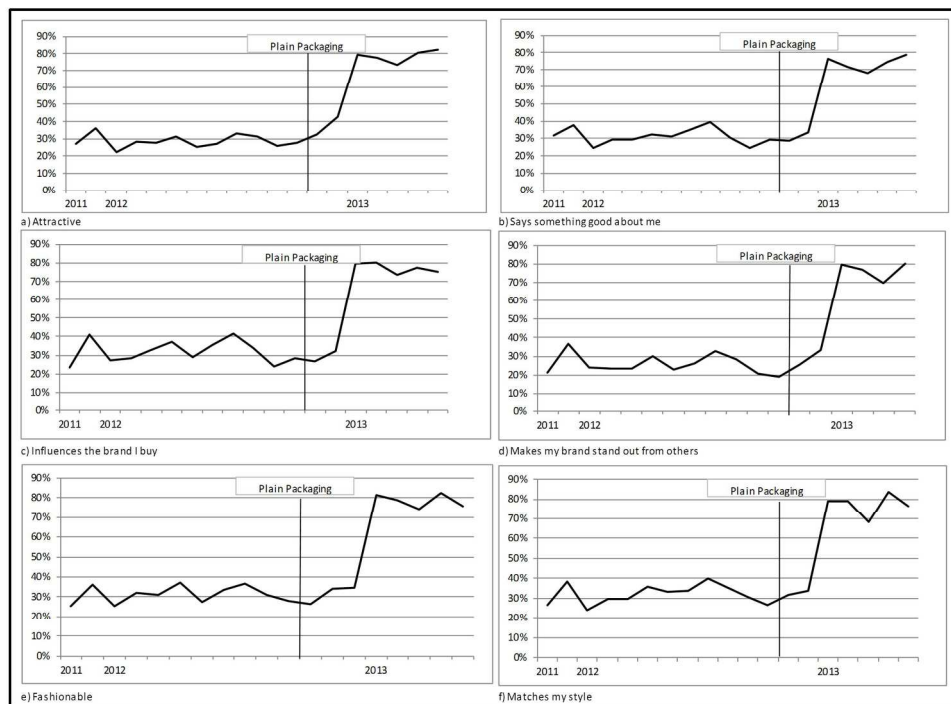

Figure 2: Monthly proportions of smokers strongly disagreeing that their cigarette pack is: (a) attractive; (b) says something good about me to other smokers; (c) influences the brand I buy; (d) makes my brand stand out from other brands; (e) is fashionable; (f) matches my style  
254x190mm (300 x 300 DPI)



1  
2  
3  
4  
5  
6  
7  
8  
9  
10  
11  
12  
13  
14  
15  
16  
17  
18  
19  
20  
21  
22  
23  
24  
25  
26  
27  
28  
29  
30  
31  
32  
33  
34  
35  
36  
37  
38  
39  
40  
41  
42  
43  
44  
45  
46  
47  
48  
49  
50  
51  
52  
53  
54  
55  
56  
57  
58  
59  
60

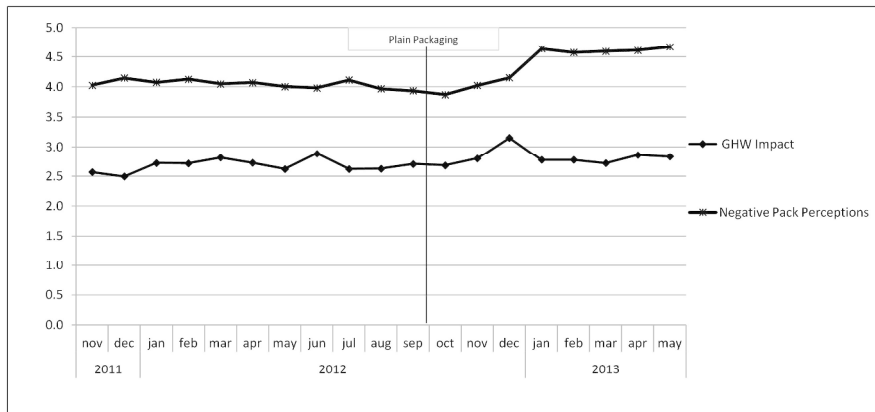

Figure 3: Monthly mean score for Graphic Health Warning Impact and Negative Pack Perception  
254x190mm (300 x 300 DPI)

Review only

1  
2  
3  
4  
5  
6  
7  
8  
9  
10  
11  
12  
13  
14  
15  
16  
17  
18  
19  
20  
21  
22  
23  
24  
25  
26  
27  
28  
29  
30  
31  
32  
33  
34  
35  
36  
37  
38  
39  
40  
41  
42  
43  
44  
45  
46  
47  
48  
49  
50  
51  
52  
53  
54  
55  
56  
57  
58  
59  
60

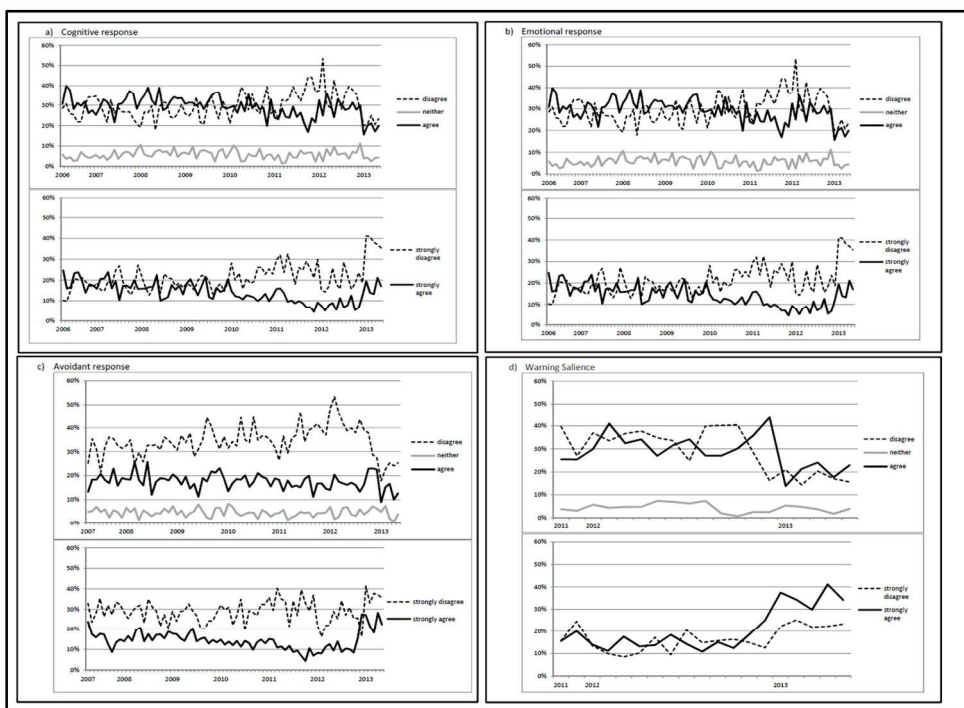

Supplementary Figure 1. Response options for responses to graphic health warnings 254x190mm (300 x 300 DPI)

Review only

1  
2  
3  
4  
5  
6  
7  
8  
9  
10  
11  
12  
13  
14  
15  
16  
17  
18  
19  
20  
21  
22  
23  
24  
25  
26  
27  
28  
29  
30  
31  
32  
33  
34  
35  
36  
37  
38  
39  
40  
41  
42  
43  
44  
45  
46  
47  
48  
49  
50  
51  
52  
53  
54  
55  
56  
57  
58  
59  
60

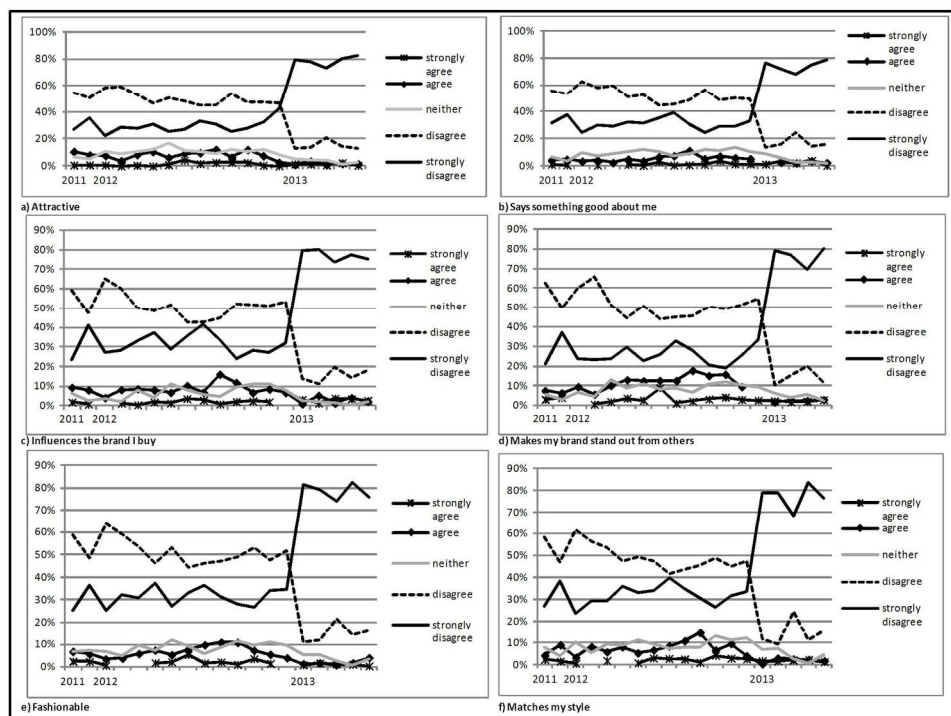

Supplementary Figure 2. Response options for pack perceptions  
254x190mm (300 x 300 DPI)

Review only

1  
2  
3 **Impact of Australia's introduction of tobacco plain packs on adult smokers' pack-**  
4 **related perceptions and responses: Results from a continuous tracking survey**  
5  
6  
7  
8

9 Sally M Dunlop, Timothy Dobbins, Jane M Young, Donna Perez, David C Currow  
10  
11  
12  
13  
14  
15  
16  
17

18 **Dr Sally Dunlop**  
19

20 Cancer Institute New South Wales, Australian Technology Park, Level 9, 8 Central Avenue,  
21  
22 Eveleigh New South Wales, 2015, Australia  
23  
24 Senior Research Officer, Cancer Screening and Prevention  
25  
26  
27  
28

29 **Dr Timothy Dobbins**  
30

31 Australian National University, Canberra, ACT, 0200, Australia  
32  
33 Research Fellow, National Centre for Epidemiology and Population Health  
34  
35  
36  
37

38 **Prof Jane M Young**  
39

40 Sydney School of Public Health, Queen Elizabeth II Research Institute (D02), University of  
41  
42 Sydney, New South Wales, 2006, Australia  
43  
44 Professor in Cancer Epidemiology, Cancer Epidemiology and Services Research  
45  
46  
47  
48

49 **Ms Donna Perez**  
50

51 Cancer Institute New South Wales, Australian Technology Park, Level 9, 8 Central Avenue,  
52  
53 Eveleigh New South Wales, 2015, Australia  
54  
55 Research and Evaluation Coordinator, Cancer Screening and Prevention  
56  
57  
58  
59  
60

1  
2  
3  
4  
5 **Prof David C Currow**  
6

7 Cancer Institute New South Wales, Australian Technology Park, Level 9, 8 Central Avenue,  
8

9  
10 Eveleigh New South Wales, 2015, Australia

11  
12 Chief Executive Officer and Chief Cancer Officer  
13

14  
15  
16 **Correspondence to:** Sally Dunlop [sally.dunlop@cancerinstitute.org.au](mailto:sally.dunlop@cancerinstitute.org.au)  
17  
18  
19  
20  
21  
22  
23  
24  
25  
26  
27  
28  
29  
30  
31  
32  
33  
34  
35  
36  
37  
38  
39  
40  
41  
42  
43  
44  
45  
46  
47  
48  
49  
50  
51  
52  
53  
54  
55  
56  
57  
58  
59  
60

**ABSTRACT**

**Objectives** – To investigate the impact of Australia’s plain tobacco packaging policy on two stated purposes of the legislation – increasing the impact of health warnings and decreasing the promotional appeal of packaging – among adult smokers.

**Design** – Serial cross-sectional study with weekly telephone surveys (April 2006 to May 2013). Interrupted time-series analyses using ARIMA modelling and linear regression models were used to investigate intervention effects.

**Participants** – 15,745 adult smokers (aged 18 years and over) in New South Wales (NSW), Australia. Random selection of participants involved recruiting households using random digit dialling and selecting the *n*th oldest smoker for interview.

**Intervention** – The introduction of the legislation on 1<sup>st</sup> October 2012.

**Outcomes** – Salience of tobacco pack health warnings, cognitive and emotional responses to warnings, avoidance of warnings, perceptions regarding one’s cigarette pack.

**Results** – Adjusting for background trends, seasonality, anti-smoking advertising activity, and cigarette costliness, results from ARIMA modelling showed that, two to three months after the introduction of the new packs, there was a significant increase in the absolute proportion of smokers having strong cognitive (9.8% increase,  $p=0.005$ ), emotional (8.6% increase,  $p=0.01$ ), and avoidant (9.8% increase,  $p=0.0005$ ) responses to on-pack health warnings. Similarly, there was a significant increase in the proportion of smokers strongly disagreeing that the look of their cigarette pack is attractive (57.5% increase,  $p<0.0001$ ), says something good about them (54.5% increase,  $p<0.0001$ ), influences the brand they buy (40.6% increase,  $p<0.0001$ ), makes their pack stand out (55.6% increase,  $p<0.0001$ ), is fashionable (44.7% increase,  $p<0.0001$ ), and matches their style (48.1% increase,  $p<0.0001$ ). Changes in these outcomes were maintained six months post-intervention.

1  
2  
3 **Conclusions** – The introductory effects of the plain packaging legislation among adult  
4 smokers are consistent with the specific objectives of the legislation in regards to reducing  
5 promotional appeal and increasing effectiveness of health warnings.  
6  
7  
8  
9  
10  
11  
12  
13  
14  
15  
16  
17  
18  
19  
20  
21  
22  
23  
24  
25  
26  
27  
28  
29  
30  
31  
32  
33  
34  
35  
36  
37  
38  
39  
40  
41  
42  
43  
44  
45  
46  
47  
48  
49  
50  
51  
52  
53  
54  
55  
56  
57  
58  
59  
60

For peer review only

**ARTICLE SUMMARY****Article Focus**

- Experimental research has shown that plain tobacco packaging can: reduce the appeal of tobacco products to consumers; increase the effectiveness of health warnings; and reduce the ability of packaging to mislead consumers about the harmful effects of smoking.
- Given that the introduction of the tobacco plain packaging legislation in Australia is the first of its kind, no research to date has investigated the impact of plain packaging on these outcomes in a real-world context with mandated plain packs.

**Key Findings**

- The introductory effects of the new packs observed in this study are consistent with the specific objectives and expected effects of the plain packaging legislation.
- This is the first study to date to demonstrate an impact of the Australian plain tobacco packs on the salience and impact of on-pack health warnings and negative perceptions about tobacco packs among adult smokers.

**Strengths and Limitations**

- Study strengths are: the use of population-level data collected over a long time period, with a large sample of adult smokers; the use of a time-series approach with multiple data points before the intervention; and the inclusion of important time-related and sample-related potential covariates.
- Limitations of the study include the use of landline-only telephone numbers and a somewhat low response rate, potentially leading to some bias in sample composition. Response rate was consistent across the study period, limiting the impact on study findings.



1  
2  
3  
4 On the 1<sup>st</sup> of December 2012, Australia became the first country to introduce mandatory plain  
5  
6 packaging for all tobacco products.<sup>1</sup> The new plain packs are olive green cardboard packages  
7  
8 devoid of all brand design elements, with brand name and quantity-number of cigarettes  
9  
10 written in a standardised font and location on each pack. The new packs continue to carry  
11  
12 coloured graphic health warnings covering 90% of the back of packs, with the warnings on  
13  
14 the front of pack enlarged from 30% to 75%. Manufacturers were required to produce the  
15  
16 new packs from the 1<sup>st</sup> of October 2012 and they started appearing for sale from that date;  
17  
18 approximately 80% of smokers were using plain packs by mid-November.<sup>2</sup>  
19  
20  
21  
22  
23

24 The plain packaging legislation aims to discourage people from taking up smoking,  
25  
26 encourage smokers to give up smoking, and discourage relapse.<sup>1</sup> The stated purpose of the  
27  
28 legislation is to regulate the packaging and appearance of tobacco products in order to: (a)  
29  
30 reduce the appeal of tobacco products to consumers, (b) increase the effectiveness of health  
31  
32 warnings, and (c) reduce the ability of packaging to mislead consumers about the harmful  
33  
34 effects of smoking. As this was the first time any such legislation had been implemented, the  
35  
36 expected outcomes of the new packs were informed by a body of research consisting  
37  
38 primarily of experimental studies, summarised in recent reviews.<sup>3-6</sup>  
39  
40  
41  
42  
43

44 Studies in which participants were presented with mocked-up plain and branded tobacco  
45  
46 packs show that plain packaging has the potential to reduce the promotional appeal of a pack,  
47  
48 diminish positive perceptions about smokers of cigarettes from that pack, and reduce the  
49  
50 appeal of smoking in general.<sup>7-13</sup> Such studies also suggest that health warnings are both  
51  
52 more noticeable and more effective when presented on plain rather than branded packs,<sup>14, 15</sup>  
53  
54 with researchers suggesting that brand imagery diffuses the impact of health warnings.<sup>16</sup>  
55  
56

57 These results have been corroborated in naturalistic studies in which smokers are assigned to  
58  
59  
60

1  
2  
3 smoke their normal cigarettes from either plain or branded packs for a period of time, with  
4  
5 plain pack smokers reporting increased negative perceptions about to their pack and smoking,  
6  
7 along with an increased impact of health warnings.<sup>17, 18</sup> A limitation of these previous studies,  
8  
9 however, is the inability to differentiate the impact of plain packaging and the novelty impact  
10  
11 of a pack which is simply different to the packs that smokers are used to seeing. No studies to  
12  
13 date have been able to investigate the impact of plain tobacco packaging on tobacco pack  
14  
15 appeal and the salience and effects of health warnings in the context of mandatory plain  
16  
17 packaging, when all packs with which smokers are in contact are devoid of any branding  
18  
19 other than a name in a standard font.  
20  
21  
22  
23  
24

25 In the current study, we use cross-sectional survey data collected weekly for a period of seven  
26  
27 years to investigate the impact of the new packaging on adult smokers' responses to the  
28  
29 health warnings on their packs and perceptions of their packs. It was hypothesised that, after  
30  
31 the introduction of the new packs, smokers would find the health warnings more salient,  
32  
33 would have an increased response to the warnings, and would hold less favourable  
34  
35 perceptions of their packs. The continuous nature of the data allowed us to track how these  
36  
37 outcomes changed after the introduction of the new packs, investigating whether any  
38  
39 observed changes were sustained in the six months following their introduction. This  
40  
41 approach builds on our previous study evaluating the impact of the introduction of the plain  
42  
43 packaging legislation on calls to a smoking cessation helpline.<sup>19</sup> Additionally, given that  
44  
45 responses to graphic pack warnings had been tracked since their initial introduction in 2006,  
46  
47 we were able to assess changes in these responses in the context of longer-term trends.  
48  
49  
50  
51  
52  
53

## 54 **METHOD**

### 56 **Study Design and Participants**

57  
58  
59  
60

1  
2  
3 The Cancer Institute's Tobacco Tracking Survey (CITTS) is a serial cross-sectional telephone  
4 survey with approximately 50 interviews conducted per week throughout the year. The  
5  
6  
7  
8  
9  
10  
11  
12  
13  
14  
15  
16  
17  
18  
19  
20  
21  
22  
23  
24  
25  
26  
27  
28  
29  
30  
31  
32  
33  
34  
35  
36  
37  
38  
39  
40  
41  
42  
43  
44  
45  
46  
47  
48  
49  
50  
51  
52  
53  
54  
55  
56  
57  
58  
59  
60

The Cancer Institute's Tobacco Tracking Survey (CITTS) is a serial cross-sectional telephone survey with approximately 50 interviews conducted per week throughout the year. The CITTS monitors smoking-related cognitions and behaviours among adult smokers and recent quitters (quit in last 12 months) in New South Wales (NSW), Australia's most populous state. Households are recruited using random digit dialling (landline telephone numbers only) and a random selection procedure is used to recruit participants within households (selecting the *n*th oldest eligible adult). Analyses for this study are limited to smokers interviewed between April 2006 and May 2013 (total *n* = 15,745), with an average response rate of 40% (American Association for Public Opinion Research Response Rate #4).<sup>20</sup> The CITTS is approved by the NSW Population Health Services Research Ethics Committee (HREC/10/CIPHS/13). The study was funded by the Cancer Institute NSW.

### Outcome Measures

31  
32  
33  
34  
35  
36  
37  
38  
39  
40  
41  
42  
43  
44  
45  
46  
47  
48  
49  
50  
51  
52  
53  
54  
55  
56  
57  
58  
59  
60

Following the introduction of the original graphic health warnings on tobacco packs in March 2006, questions were included in CITTS relating to smokers' responses to the warnings. These questions assessed cognitive response to the warnings ('the graphic warnings encourage me to stop smoking') and emotional response ('with the graphic warnings, each time I get a cigarette out I worry that I shouldn't be smoking'). From April 2007, warning avoidance was also assessed ('they make me feel that I should hide or cover my packet from the view of others'). From October 2011, the salience of the warnings was also assessed ('the only thing I notice on my cigarette pack is the graphic warnings'). All answers were given on a 5-point Likert scale (1=strongly disagree- 5=strongly agree). [The distributions of responses to these items over the study period are shown in Supplementary Figure 1. Responses to these items were used in two ways. The first was collapsing responses for each item into a binary variable indicating strong agreement vs. not. The second was averaging the responses to these](#)

1  
2  
3 [items to create a scale indicating 'Graphic Health Warning Impact', with higher scores](#)  
4  
5 [indicating greater overall impact \(Cronbach's alpha =0.70\). Due to distributions of the data,](#)  
6  
7 [responses were collapsed into a binary variable indicating strong agreement vs. other.](#)  
8  
9

10  
11  
12  
13  
14 From October 2011 smokers were asked a battery of questions relating to their perceptions of  
15 their packs: 'The look of my cigarette pack...' (i) is attractive; (ii) says something good about  
16 me to other smokers; (iii) influences the brand I buy; (iv) makes my brand stand out from  
17 other brands; (v) is fashionable; and (vi) matches my style (1=strongly disagree-5=strongly  
18 agree). [Distributions of responses to these items over the study period are shown in](#)  
19  
20  
21 [Supplementary Figure 2. Responses to each item were dichotomised into strongly disagree](#)  
22  
23 [vs. not, and they were also reverse scored and averaged to create a scale indicating 'Negative](#)  
24  
25 [Pack Perceptions' \(Cronbach's alpha=0.87\), with higher scores indicating more negative](#)  
26  
27 [perceptions. Responses were dichotomized into strongly disagree vs. other. Changes in each](#)  
28  
29 [of these individual items in relation to the introduction of the new tobacco packs were](#)  
30  
31 [explored, and for the purpose of analysis, we also constructed a variable indicating strong](#)  
32  
33 [negative pack perceptions \(strong disagreement with all of the statements vs. not\).](#)  
34  
35  
36  
37  
38  
39  
40  
41  
42

### 43 **Covariates**

44  
45 Data on sex, age, total household income, and educational attainment (low=less than high  
46 school; moderate=high school diploma or vocational college; high=tertiary), were included in  
47 CITTS. Socio-economic status (SES) was indicated by a variable that combined responses to  
48 household income and educational attainment.<sup>21, 22</sup> High SES was defined as having a  
49 household income of more than AUD\$80,000 (and any education level), or an income of  
50 AUD\$40-80,000 and moderate-high education. Moderate SES was defined as either an  
51  
52  
53  
54  
55  
56  
57  
58  
59  
60

1  
2  
3 income below AUD\$40,000 and high education, or an income of AUD\$40-80,000 and  
4  
5 moderate education. Low SES was defined as either an income below AUD\$40,000 and low  
6  
7 or moderate education, or an income AUD\$40-80,000 and low education. Those with missing  
8  
9 data on one variable were classified based on the other.  
10

11  
12  
13  
14 Frequency of smoking was used to classify smokers as ‘daily’, ‘weekly’, or ‘less frequent  
15 smokers. Average number of cigarettes smoked per day was used to indicate heaviness of  
16  
17 smoking (light=less than 10 cigarettes per day; moderate=11-20 cigarettes per day;  
18  
19 heavy=more than 20 cigarettes per day). As smokers’ responses to graphic health warnings  
20  
21 and perceptions of their cigarette packs might conceivably be related to their quitting  
22  
23 experiences or propensity towards quitting, we also included quit attempts in the last 12  
24  
25 months as a control variable (1=tried to quit at least once in the last 12 months, 0=did not).  
26  
27  
28  
29

30  
31  
32 Along with demographic and smoking characteristics, respondents’ pack perceptions and  
33  
34 responses to health warnings might also possibly be influenced by the timing of their  
35  
36 interview in terms of variations in anti-smoking advertising activity, changes in the costliness  
37  
38 of cigarettes, or shifting social norms. Respondents’ level of exposure to anti-smoking  
39  
40 advertising in the three months prior to their interview was measured in terms of Target  
41  
42 Audience Ratings Points (TARPs). TARPs are a product of the percentage of the target  
43  
44 audience exposed to an advertisement (reach) and the average number of times a target  
45  
46 audience member would be exposed (frequency). Hence, 200 TARPs might represent 100%  
47  
48 of the target audience receiving the message an average of two times over a specified period,  
49  
50 or 50% reached four times. Exposure to advertising over a 3-month period was chosen based  
51  
52 on previous research suggesting that advertising effects occur within this time frame.<sup>22, 23</sup> We  
53  
54 ascertained TARPs for each of the advertisements broadcast in NSW during the study period  
55  
56  
57  
58  
59  
60

1  
2  
3 based on OZTAM Australian TV Audience Measurements for adults aged 18years and older  
4  
5 for free-to-air and cable TV ( $M=1590$ ,  $SD=758$ ).<sup>24</sup>  
6  
7

8  
9 A variable indicating cigarette costliness<sup>25</sup> at time of interview was calculated as the ratio of  
10 the average quarterly recommended retail pack price of the 2 top-selling Australian cigarette  
11 brands (obtained from the retail trade magazine *Australian Retail Tobacconist*, volumes 65 to  
12 87) to the average weekly earnings in the same quarter ( $M=1.54$ ,  $SD=0.17$ ).<sup>26</sup>  
13  
14  
15  
16  
17

18 The influence of changing social norms was accounted for by statistically accounting for a  
19 time-based trend in the data, [described below](#).  
20  
21  
22  
23  
24

### 25 **Statistical analyses**

26  
27 Two approaches to statistical analysis were used to assess the impact of the new packs on  
28 each outcome. The first approach used interrupted time series analysis, in which data  
29 collected at multiple instances before and after an intervention is used to detect whether the  
30 intervention has an effect significantly greater than the underlying secular trend. The  
31 advantages of using this approach include the ability to account for background trends,  
32 control for seasonal variations, adjust for auto-correlation in the data (when each value is  
33 correlated with the previous value), and to assess changes in the outcome in the context of  
34 longer-term trends. We also used [multiple linear regression analyses](#) to compare the [scores](#)  
35 [for the two constructed scales](#) in the months [prior to and](#) following the new packaging  
36 legislation, controlling for socio-demographic and smoking characteristics.  
37  
38  
39  
40  
41  
42  
43  
44  
45  
46  
47  
48  
49  
50

51 In the time-series analysis, [weekly data were aggregated at the monthly level \(to ensure](#)  
52 [sufficient sample size at each time point\)](#). We assessed the impact of the introduction of the  
53 [new packs on \(a\) the proportion of sample strongly agreeing with each of the graphic health](#)  
54  
55  
56  
57  
58  
59  
60

1  
2  
3 [warning statements, \(b\) mean Graphic Health Warning Impact score, \(c\) the proportion of the](#)  
4 [sample strongly disagreeing with each of the pack perception statements, and \(d\) mean](#)  
5 [Negative Pack Perception score.](#) We used autoregressive integrated moving average  
6  
7  
8  
9  
10 (ARIMA) analysis in SAS version 9.3<sup>27</sup> to model the effects of the introduction of the new  
11  
12 packaging on the outcomes of interest, while accounting for background trends, seasonal  
13  
14 variation, the effects of television anti-tobacco advertising, and changes in cigarette  
15  
16 costliness. ARIMA modelling was chosen because the data for each of the outcomes of  
17  
18 interest were auto-correlated.  
19

20  
21  
22  
23 ARIMA modelling comprising model investigation, estimation and diagnostic checking  
24 followed the methods of Box *et al.*<sup>28</sup> This modelling enables investigation of the size and  
25  
26 statistical significance of changes in an outcome after a specified time point, adjusting for  
27  
28 background trends and confounders. An indicator term was created to represent the week of  
29  
30 the introduction of the intervention (the ‘phasing in’ of the new packs on 1 October 2012).  
31  
32 The potential confounders of anti-smoking advertising activity (TARPs) and cigarette  
33  
34 costliness were included in all models. In the models predicting responses to graphic health  
35  
36 warnings, terms indicating the months of December and January were also included to  
37  
38 account for potential for seasonal variations (not included for pack perception outcomes due  
39  
40 to limited data points). Due to the large number of outcomes to be reported, we do not report  
41  
42 the effects of these covariates (available from authors on request).  
43  
44  
45  
46  
47  
48

49  
50 Next, we [used multiple linear regression analyses to assess changes in scores on the Graphic](#)  
51 [Health Warning Impact and Negative Pack Perception scales,](#) using month of interview as the  
52  
53 indicator, focusing on the period of the introduction of the new packs (August 2012 – May  
54  
55 2013).<sup>29</sup> The months preceding and following the intervention were represented by a five-  
56  
57  
58  
59  
60

1  
2  
3 level term: (a) the two months preceding the change (August-September, 'pre-plain packs  
4 (PP)'); (b) the two months of 'phase-in' (October-November); (c) the two months 'immediate  
5 post-PP' (December-January); (d) '3-4 months post-PP' (February-March); and (e) '5-6  
6 months post-PP' (April-May). Demographic and smoking characteristics were included as  
7 covariates, along with recent anti-smoking advertising activity. Because changes in cigarette  
8 costliness were based on quarterly data, there was a high degree of multi-collinearity between  
9 costliness and time of interview (VIF=26), resulting in inflated standard errors and unstable  
10 estimates of regression coefficients. We therefore [included a variable indicating 'increase in  
11 cigarette costliness' in the last 12 weeks \(as a percentage of costliness\)](#) as a covariate in these  
12 models. To provide a point of comparison, these models were also fitted to 2011-2012 data  
13 for the same months. [An alpha level of 0.05 was used for all statistical tests.](#) Stata v11 [was  
14 used for the regression analyses.](#)<sup>30</sup>

15  
16  
17  
18  
19  
20  
21  
22  
23  
24  
25  
26  
27  
28  
29  
30  
31  
32 [Due to a slight over-representation of females, older respondents, and regional residents  
33 \(living outside of the capital city\) in the CITTS sample compared to the NSW population,](#)<sup>31</sup>  
34 [weights were constructed using age, sex, and region of residence to make the sample more  
35 similar to the NSW population.](#) Weights were applied in [the multiple linear regression  
36 analyses \(using 'p' weights\).](#)

## 37 38 39 40 41 42 43 44 45 **RESULTS**

46  
47 [Response rate for the survey was an average of 40% in the period 2006-2013.](#)

48  
49 Sample characteristics are shown in Table 1.

### 50 51 52 53 54 **Responses to graphic health warnings**



1  
2  
3 Figure 1 shows the monthly proportions of the smoker sample strongly agreeing with each of  
4 the graphic health warning responses over time. In general, strong agreement about the  
5 impact of the warnings had been decreasing since their introduction in 2006. Of smokers  
6 interviewed in 2006: 21% reported strong cognitive responses to the warnings, decreasing to  
7 12% in 2011; and 20% reported strong emotional response, decreasing to 12% in 2011.  
8  
9  
10  
11  
12  
13

14  
15  
16 The results of the interrupted time series analyses investigating the impact of the new  
17 packaging on responses to graphic health warnings are shown in Table 2. For all models, the  
18 residuals were uncorrelated and normally distributed, and all other model diagnostics  
19 indicated suitable model fit. After controlling for background trends, seasonality, anti-  
20 smoking advertising activity and cigarette costliness, there was a significant increase in the  
21 proportion of smokers having strong cognitive, emotional and avoidant responses to graphic  
22 warnings after the introduction of the new packs. The increase in the avoidant response  
23 occurred two months after the new packs were introduced ([from 10% in September 2012 to](#)  
24 [28% in December](#)), and the increase in cognitive and emotional responses occurred after  
25 three months ([cognitive: from 13% in September 2012 to 20% in January 2013; emotional:](#)  
26 [from 13% to 27%](#)). In the time-series analysis, the change in the proportion of smokers  
27 strongly agreeing that the warnings were the only thing they noticed on their packs after the  
28 introduction of the new packs was not significant.  
29  
30  
31  
32  
33  
34  
35  
36  
37  
38  
39  
40  
41  
42  
43  
44  
45  
46

47 [The monthly average of the GHW Impact scale is shown in Figure 3. The results of the](#)  
48 [interrupted time series analysis investigating the impact of the new packaging on GHW](#)  
49 [Impact scores are shown in Table 2. The residuals were uncorrelated and normally](#)  
50 [distributed, and all other model diagnostics indicated suitable model fit. There was a](#)  
51 [significant increase in scores on the GHW Impact scale two months after the introduction of](#)  
52  
53  
54  
55  
56  
57  
58  
59  
60

1  
2  
3 [the new packs, not attributable to background trends, seasonality, anti-smoking advertising](#)  
4  
5 [activity or cigarette costliness.](#)  
6  
7

8  
9  
10 The results of the [multiple linear regression model predicting scores on the GHW Impact](#)  
11 [scale](#) are shown in Table 3. [Compared to the pre-plain packaging period \(August/September](#)  
12 [2012\), scores on the scale was significantly higher in immediate post-plain packaging period](#)  
13 [\(December/January\) and in the 5-6 month post-plain packaging period \(April/May\). These](#)  
14 [effects were independent of any differences between the samples on socio-demographic or](#)  
15 [smoking characteristics, anti-smoking advertising activity, or increases in cigarette costliness.](#)  
16  
17  
18  
19  
20  
21  
22  
23 [There were no significant differences in scores on this scale over the months of the](#)  
24 [comparison period.](#)  
25  
26  
27

### 28 29 **Pack perceptions**

30  
31  
32 The monthly proportions of smokers strongly disagreeing with each of the pack attitude items  
33 are shown in Figure 2. The results of the interrupted time series analysis (Table 2) show that,  
34 three months following the introduction of the new packs, there was a significant increase in  
35 the proportion of smokers strongly disagreeing that the look of their cigarette pack is  
36 attractive [\(from 26% in September 2012 to 80% in January 2013\)](#), says something good about  
37 them [\(from 27% to 76%\)](#), influences the brand they buy [\(from 27% to 77%\)](#), makes their  
38 brand stand out [\(from 22% to 78%\)](#), is fashionable [\(from 27% to 80%\)](#), and matches their  
39 style [\(from 31% to 77%\)](#). This effect was independent of any influence of long-term  
40 background trends, cigarette costliness, or anti-smoking advertising activity.  
41  
42  
43  
44  
45  
46  
47  
48  
49  
50  
51

52  
53  
54 [The monthly average of the Negative Pack Perception scale is shown in Figure 3, and the](#)  
55 [results of the interrupted time series analysis investigating the impact of the new packaging](#)  
56  
57  
58  
59  
60

1  
2  
3 on these scores are shown in Table 2. The residuals were uncorrelated and normally  
4 distributed, and all other model diagnostics indicated suitable model fit. There was a  
5 significant increase in scores on the Negative Pack Perception scale three months after the  
6 introduction of the new packs, not attributable to background trends, seasonality, anti-  
7 smoking advertising activity or cigarette costliness.  
8  
9  
10  
11  
12

13  
14  
15  
16 The multiple linear regression model predicting Negative Pack Perception scores over the pp-  
17 periods showed that scores on this scale were significantly higher in each of the post-pp  
18 periods than in the pre-pp period (Table 3). For the comparison period, there were no  
19 significant differences in scores on this scale.  
20  
21  
22  
23  
24  
25  
26  
27

## 28 **DISCUSSION**

29  
30 To our knowledge, this is the first study to examine the population-level impact of the new  
31 tobacco plain packs on Australian adult smokers' responses to their packs. This is an  
32 important first step in evaluating the policy as these outcomes relate closely to the intended  
33 purpose of the legislation. In the months following the introduction of the new packs, there  
34 was an increase in the proportion of smokers reporting strong cognitive and emotional  
35 responses to the warnings, avoidant behaviours related to the on-pack warnings, and salience  
36 of warnings. There was also an increase in the proportion of smokers with strong negative  
37 perceptions about their packs. These changes were not attributed to variations in exposure to  
38 anti-smoking advertising activity, tobacco prices, secular trends, seasonality or changes in  
39 sample composition.  
40  
41  
42  
43  
44  
45  
46  
47  
48  
49  
50  
51

52  
53  
54 Consistent with the results of experimental research,<sup>14, 15, 17</sup> we found that the introduction of  
55 the new packs was associated with an increase in the salience and the self-reported impact of  
56  
57  
58  
59  
60

1  
2  
3 the health warnings, such that smokers were more likely to report that the warnings are the  
4  
5 only thing they see on their packs, that they feel they should hide or cover their pack, that the  
6  
7 warnings encourage them to stop smoking, and that they make them worry that they  
8  
9 shouldn't be smoking. Prominent graphic health warnings on tobacco products have been  
10  
11 shown to increase health knowledge and perceptions of risk from smoking,<sup>32, 33</sup> reduce  
12  
13 consumption levels and increase cessation behaviour among smokers,<sup>33, 34</sup> and support former  
14  
15 smokers in remaining abstinent.<sup>35</sup> Importantly, the impact of graphic health warnings on  
16  
17 smoking behaviours appears to be a function of the depth of smokers' cognitive processing of  
18  
19 and responses to the warnings (such as those monitored in the current study),<sup>34-36</sup> suggesting  
20  
21 that if plain packaging can intensify smokers' responses to warnings, flow-on effects on  
22  
23 consumption and quitting are likely.  
24  
25  
26  
27  
28

29  
30 Research shows that the impact of pictorial health warnings declines over time.<sup>33 37</sup> Of note is  
31  
32 the fact that the introduction of the new packs appears to have reversed a downward trend in  
33  
34 smokers' cognitive, emotional, and avoidant responses to the graphic health warnings that  
35  
36 had been occurring since their initial introduction. On the current plain packaging, the  
37  
38 warnings are having an equal or greater impact on adult smokers than they have since their  
39  
40 inception. Due to the simultaneous introduction of the plain packs and changes in the size and  
41  
42 content of the warnings themselves, the relative contribution of the warning and pack changes  
43  
44 to this increase in smoker responses cannot be determined in this study. Nonetheless, recent  
45  
46 evidence from eye-tracking studies suggests that plain packing itself can increase visual  
47  
48 attention towards warning information on cigarette packs.<sup>38, 39</sup> [Future research should assess  
49  
50 whether the downward trend in responses to health warnings resumes following the  
51  
52 introductory period of plain packaging.](#)  
53  
54  
55  
56  
57  
58  
59  
60

1  
2  
3 Extending experimental evidence on the influence of plain packaging on brand appeal,<sup>7-9, 40</sup>  
4  
5 the current study demonstrates an impact of the new packs on adult smokers' perceptions that  
6  
7 their own packs are fashionable or attractive, that they match their style or say something  
8  
9 good about them to other smokers, or that the pack makes their brand stand out or influences  
10  
11 the brand they buy. There is a wide body of evidence from marketing literature that shows  
12  
13 how branding and packaging can modify the expected and actual subjective experience of  
14  
15 products.<sup>41</sup> Notably, changes in the way smokers perceive their pack have the potential to  
16  
17 augment smokers' subjective experience of smoking, leading to a more negative perception  
18  
19 of the taste of their cigarettes and less enjoyment in the act of smoking.<sup>7</sup> Indeed, anecdotal  
20  
21 evidence suggests that Australian smokers reported their cigarettes tasted worse with the  
22  
23 introduction of plain packaging,<sup>42, 43</sup> and smokers smoking from plain packs during the  
24  
25 phase-in period perceived their cigarettes to be less satisfying and lower in quality than a year  
26  
27 ago.<sup>2</sup> The likely impact of changes in the perceived experience of smoking is an important  
28  
29 avenue for future studies, but research identifying enjoyment of smoking as a barrier to  
30  
31 quitting suggests that smokers who find smoking their less enjoyable might be more likely to  
32  
33 try and quit.<sup>44</sup>  
34  
35  
36  
37  
38  
39  
40

41 The temporal pattern of changes found in this study is consistent with other early evaluations  
42  
43 of the impact of the new plain packs. The proportion of smokers reporting negative responses  
44  
45 to their packs and the warnings on them increased throughout the phase-in period,  
46  
47 corresponding to the increasing proportion of plain packs observed in public venues during  
48  
49 that period,<sup>45</sup> and the number of smokers reporting to be smoking from plain packs.<sup>2</sup> The  
50  
51 earliest effects of the new packs have been detected during this phase-in period, with declines  
52  
53 in rates of active smoking observed in outdoor dining venues in October-November,<sup>45</sup> and  
54  
55 calls to a cessation helpline peaking in November.<sup>19</sup> From the current time-series analysis,  
56  
57  
58  
59  
60

1  
2  
3 smokers' tendency to avoid the on-pack health warnings increased significantly in December,  
4  
5 two months after the plain packs started appearing, when plain packs became mandatory for  
6  
7 sale. This coincides with an observed decline in rates of pack display and an increase in  
8  
9 concealment of packs in outdoor venues.<sup>45</sup> Other changes observed in the current study  
10  
11 (cognitive and emotional responses to graphic health warnings, and negative pack  
12  
13 perceptions) reached significance in January, at a time when less than 5% of packs observed  
14  
15 in outdoor venues were fully-branded.<sup>45</sup> These changes occurred just after an increase in the  
16  
17 number of smokers rating their cigarettes as being lower in quality and less satisfying than  
18  
19 one year ago.<sup>2</sup> All changes in pack-related responses observed in the current study were  
20  
21 maintained at eight months after the first appearance of the new packs, [the last data point in](#)  
22  
23 [the current series.](#)  
24  
25  
26  
27  
28

29  
30 The strengths of this study include the use of population-level data collected over a long time  
31  
32 period, resulting in a large sample of adult smokers. As recommended in a recent review of  
33  
34 the plain packaging literature,<sup>5</sup> the use of a time-series approach with multiple data points  
35  
36 before the intervention increased the power to detect any effects over and above long-term  
37  
38 background and seasonal trends, and the inclusion of important time-related potential  
39  
40 covariates decreased threats to the validity of the findings. The regression analyses allowed  
41  
42 us to control for any changes in sample composition in regards to demographic characteristics  
43  
44 such as SES and smoking levels. [We note that the sample for this study consisted of current](#)  
45  
46 [smokers only, and therefore any smokers who quit in the post-plain packaging period would](#)  
47  
48 [be excluded. This might have resulted in a sample of smokers somewhat resistant to this](#)  
49  
50 [intervention, and as such, the estimates provided in this study might be more conservative](#)  
51  
52 [than if we had also surveyed smokers who quit during this time.](#)  
53  
54  
55  
56  
57  
58  
59  
60

1  
2  
3 Limitations of the study include the use of landline-only telephone numbers and a somewhat  
4  
5 low response rate, possibly leading to some bias in sample composition. The rate of mobile-  
6  
7 only households in Australia, recently estimated at 19%, increased over the years of this  
8  
9 study was recently estimated at 14%, quantifying concerns about excluding these  
10  
11 individuals.<sup>46</sup> Recent dual-frame surveys have shown that samples recruited via mobile-  
12  
13 phone are more likely to include younger respondents and males than landline samples.<sup>47</sup> The  
14  
15 impact of these demographic differences are likely to be reduced in the current study due to  
16  
17 the inclusion of age and gender as covariates, the use of data weighted for these variables  
18  
19 where appropriate, and the inclusion of smoking-related covariates related to these  
20  
21 demographic characteristics. The response rate of CITTS is similar to that of other population  
22  
23 telephone surveys on tobacco use in Australia,<sup>48</sup> and was consistent across the study period,  
24  
25  
26  
27 limiting its influence on the observed pattern of results.  
28  
29

30  
31  
32 In an environment of strict tobacco promotion prohibition such as Australia, cigarette  
33  
34 packaging had become the key tool used by the tobacco industry to attract and retain  
35  
36 customers.<sup>49, 50</sup> The purpose of the plain packaging legislation was to deprive tobacco  
37  
38 companies of an ongoing opportunity to promote their products in the community. The  
39  
40 introductory effects of the plain packaging legislation observed in this study are consistent  
41  
42 with the specific objectives of the legislation in regards to increasing the salience and impact  
43  
44 of health warnings, and reducing the promotional appeal of tobacco packaging. Due to the  
45  
46 fact that tobacco packs are handled every time a smoker takes out a cigarette, those who  
47  
48 smoke more than a pack per day were potentially exposed to their new packs almost 4,000  
49  
50 times in the first six months of the legislated changes. The findings of this study suggest that  
51  
52 the new packs are decreasing smokers' identification with their packs and making them think  
53  
54 more closely about the health warnings contained on them, potentially moving them closer to  
55  
56  
57  
58  
59  
60

1  
2  
3 cessation. [Future research should extend this study by considering any relationships between](#)  
4 [smokers' responses to their plain packaging packs and changes in smoking behaviours,](#)  
5 [investigating whether the introductory effects identified in this study were apparent in youth](#)  
6 [smokers, and monitoring the impact of plain packaging on perceptions about smoking among](#)  
7 [non-smoking youth and adults.](#)  
8  
9  
10  
11  
12  
13  
14  
15  
16  
17  
18  
19  
20  
21  
22  
23  
24  
25  
26  
27  
28  
29  
30  
31  
32  
33  
34  
35  
36  
37  
38  
39  
40  
41  
42  
43  
44  
45  
46  
47  
48  
49  
50  
51  
52  
53  
54  
55  
56  
57  
58  
59  
60

For peer review only



## **COPYRIGHT**

The Corresponding Author (SD) has the right to grant on behalf of all authors and does grant on behalf of all authors, an exclusive licence on a worldwide basis to the BMJ Publishing Group Ltd to permit this article (if accepted) to be published in BMJ editions and any other BMJ PGL products and sub-licences such use and exploit all subsidiary rights, as set out in our licence.

## **COMPETING INTERESTS**

SD, TD, JY, DP, DC have completed the Unified Competing Interest form at [www.icmje.org/coi\\_disclosure.pdf](http://www.icmje.org/coi_disclosure.pdf) (available on request from the corresponding author) and declare (1) no support from any third party organisation for the submitted work; (2) no financial relationships with any company that might have an interest in the submitted work in the previous three years; (3) their spouses, partners, or children have no financial relationships that may be relevant to the submitted work; and (4) all authors have no non-financial interests that may be relevant to the submitted work.

## **CONTRIBUTORSHIP STATEMENT**

SD, DP and JY conceived the study. DP and SD acquired the data. SD searched the literature and extracted the data. TD and SD did the analyses. All authors interpreted the data. SD drafted the manuscript. TD, JY, DP and DC contributed to the initial revision of the manuscript. SD, TD, JY, DP and DC contributed to the critical revision of the manuscript before publication. SD is the guarantor. All authors had full access to all of the data in the study and take responsibility for the integrity of the data and the accuracy of the data analysis.

**TRANSPERANCY**

SD affirms that the manuscript is an honest, accurate, and transparent account of the study being reported; that no important aspects of the study have been omitted; and that any discrepancies from the study as planned have been explained.

**ETHICS APPROVAL**

The CITTS has ethics approval from the NSW Population Health Services Research Ethics Committee (HREC/10/CIPHS/13). All respondents gave informed consent before taking part in the study.

**FUNDING**

This study was internally funded by the Cancer Institute NSW.

**DATA SHARING**

No additional data available.

1  
2  
3 Figure 1: Monthly proportions of smokers strongly agreeing that: (a) the graphic warnings  
4 encourage me to stop smoking (cognitive response); (b) with the graphic warnings, each time  
5 I get a cigarette out I worry that I shouldn't be smoking (emotional response); (c) they make  
6 me feel that I should hide or cover my packet from the view of others (avoidant response); (d)  
7 the only thing I notice on my cigarette pack is the graphic warnings (warning salience)  
8  
9  
10  
11  
12  
13  
14  
15

16 Figure 2: Monthly proportions of smokers strongly disagreeing that their cigarette pack is: (a)  
17 attractive; (b) says something good about me to other smokers; (c) influences the brand I buy;  
18 (d) makes my brand stand out from other brands; (e) is fashionable; (f) matches my style  
19  
20  
21  
22  
23  
24  
25

26 Figure 3: Monthly mean score for Graphic Health Warning Impact and Negative Pack  
27 Perception  
28  
29  
30  
31  
32  
33  
34  
35  
36  
37  
38  
39  
40  
41  
42  
43  
44  
45  
46  
47  
48  
49  
50  
51  
52  
53  
54  
55  
56  
57  
58  
59  
60

**REFERENCES**

1. Tobacco Plain Packaging Act 2011 (No. 148, 2011), Australian Commonwealth Government(2011).
2. Wakefield M, Hayes L, Durkin S, Borland R. Introduction effects of the Australian plain packaging policy on adult smokers: a cross-sectional study. *BMJ Open*. 2013;3:e003175.
3. Stead M, Moodie C, Angus K, Bauld L, McNeill A, Thomas J, et al. Is consumer response to plain/standardised tobacco packaging consistent with framework convention on tobacco control guidelines? A systematic review of quantitative studies. *PLoS One*. 2013;8(10):e75919.
4. Quit Victoria CCV. Plain packaging of tobacco products: a review of the evidence. Melbourne: Cancer Council Australia, <http://www.cancervic.org.au/plainfacts/browse.asp?ContainerID=plainfacts-evidence>, 2011.
5. Moodie C, Stead M, Bauld L, McNeill A, Angus K, Hinds K, et al. Plain Tobacco Packaging: A Systematic Review. Available: [http://phrc.lshtm.ac.uk/papers/PHRC\\_006\\_Final\\_Report.pdf](http://phrc.lshtm.ac.uk/papers/PHRC_006_Final_Report.pdf). Accessed 2014 April 10. University of Stirling, 2012.
6. Hammond D. "Plain packaging" regulations for tobacco products: the impact of standardizing the color and design of cigarette packs. *Salud Publica Mex*. 2010;52 Suppl 2:S226-32.
7. Wakefield M, Germain D, Durkin S. How does increasingly plainer cigarette packaging influence adult smokers' perceptions about brand image? An experimental study. *Tob Control*. 2008;17:416-21.

- 1  
2  
3 8. Wakefield M, Germain D, Durkin S, Hammond D, Goldberg M, Borland R. Do larger  
4 pictorial health warnings diminish the need for plain packaging of cigarettes? *Addiction*.  
5  
6 2012;107(6):1159-67.  
7
- 8  
9 9. Germain D, Wakefield MA, Durkin SJ. Adolescents' perceptions of cigarette brand  
10 image: does plain packaging make a difference? *J Adolesc Health*. 2010;46(4):385-92.  
11
- 12 10. Hammond D, Daniel S, White CM. The effect of cigarette branding and plain  
13 packaging on female youth in the United Kingdom. *J Adolesc Health*. 2013;52(2):151-7.  
14
- 15 11. Gallopel-Morvan K, Moodie C, Hammond D, Eker F, Beguinot E, Martinet Y.  
16 Consumer perceptions of cigarette pack design in France: a comparison of regular, limited  
17 edition and plain packaging. *Tob Control*. 2012;21(5):502-6.  
18
- 19 12. Moodie C, Ford A, Mackintosh AM, Hastings G. Young people's perceptions of  
20 cigarette packaging and plain packaging: an online survey. *Nicotine Tob Res*. 2012;14(1):98-  
21 105.  
22
- 23 13. Scheffels J, Lund I. The impact of cigarette branding and plain packaging on  
24 perceptions of product appeal and risk among young adults in Norway: A between-subjects  
25 experimental survey. *BMJ Open*. 2013;3(12):e003732.  
26
- 27 14. McCool J, Webb L, Cameron LD, Hoek J. Graphic warning labels on plain cigarette  
28 packs: Will they make a difference to adolescents? *Soc Sci Med*. 2012;74:1269-73.  
29
- 30 15. Goldberg ME, Liefeld J, Madill J, Vredenburg H. The effect of plain packaging on  
31 response to health warnings. *Am J Public Health*. 1999;89(9):1434-5.  
32
- 33 16. Freeman B, Chapman S, Rimmer M. The case of plain packaging of tobacco products.  
34 *Addiction*. 2008;103:580-90.  
35
- 36 17. Moodie C, Mackintosh AM, Hastings G, Ford A. Young adult smokers' perceptions  
37 of plain packaging: a pilot naturalistic study. *Tob Control*. 2011;20(5):367-73.  
38  
39  
40  
41  
42  
43  
44  
45  
46  
47  
48  
49  
50  
51  
52  
53  
54  
55  
56  
57  
58  
59  
60

- 1  
2  
3 18. Moodie CS, Mackintosh AM. Young adult women smokers' response to using plain  
4  
5 cigarette packaging: a naturalistic approach. *BMJ Open*. 2013;3(3).  
6
- 7 19. Young J, Stacey I, Dobbins T, Dunlop S, Dessaix A, Currow D. The association  
8  
9 between tobacco plain packaging and Quitline calls: a population-based, interrupted time  
10  
11 series analysis. *Med J Aust*. 2014;200(1):29-32.  
12
- 13 20. American Association for Public Opinion Research. Standard definitions: final  
14  
15 dispositions of case codes and outcome rates for surveys. Lenexa, Kansas: AAPOR; 2008.  
16
- 17 21. Wakefield MA, Bowe SJ, Durkin SJ, Yong HH, Spittal MJ, Simpson JA, et al. Does  
18  
19 tobacco-control mass media campaign exposure prevent relapse among recent quitters?  
20  
21 *Nicotine Tob Res*. 2013;15(2):385-92.  
22
- 23 22. Wakefield M, Spittal MJ, Yong HH, Durkin SJ, Borland R. Effects of mass media  
24  
25 campaign exposure intensity and durability on quit attempts in a population-based cohort  
26  
27 study. *Health Educ Res*. 2011;26(6):988-97.  
28
- 29 23. Dunlop S, Perez D, Cotter T, Wakefield M. Televised Antismoking Advertising:  
30  
31 Effects of Level and Duration of Exposure. *Am J Public Health*. 2013;103(8):e66-e73.  
32  
33
- 34 24. OzTAM. Weekly TARP data for all television markets in NSW, Australia, 2005-  
35  
36 2013. Prepared for The Cancer Institute NSW. . North Sydney, Australia: OzTAM Pty Ltd  
37  
38
- 39 25. Wakefield M, Durkin S, Spittal M, Siahpush M, Scollo M, Simpson JA, et al. Impact  
40  
41 of tobacco control policies and mass media campaigns on monthly adult smoking prevalence.  
42  
43 *Am J Public Health*. 2008;98:1443-50.  
44  
45
- 46 26. Australian Bureau of Statistics. Average Weekly Earnings. Canberra, Australia:  
47  
48 Australian Bureau of Statistics, 2013.  
49
- 50 27. SAS Institute Inc. SAS version 9.3. Cary, NC2011.  
51
- 52 28. Box GEP, Jenkins GM, Reinsel GC. Time series analysis: Forecasting and control  
53  
54 (4th ed.). Hoboken, NJ: John Wiley & Sons 2008.  
55  
56  
57  
58  
59  
60

- 1  
2  
3 29. Cohen J, Cohen P, West S, Aiken LS. Applied Multiple Regression/Correlation  
4  
5 Analysis for the Behavioral Sciences (3rd ed.). Mahwah, NJ: Erlbaum; 2003.
- 6  
7 30. StataCorp. Stata v11.1 Texas, USA: 2009.
- 8  
9 31. Australian Bureau of Statistics. Population by age and sex, Australian states and  
10  
11 territories, June 2006. Canberra: Australian Bureau of Statistics, 2007 Contract No.: cat no.  
12  
13 3201.0.
- 14  
15 32. Miller CL, Hill DJ, Quester PG, Hiller JE. Response of mass media, tobacco industry  
16  
17 and smokers to the introduction of graphic cigarette pack warnings in Australia. *Eur J Public*  
18  
19 *Health*. 2009;19(6):644-9.
- 20  
21 33. Hammond D. Health warning messages on tobacco products: a review. *Tob Control*.  
22  
23 2011;20(5):327-37.
- 24  
25 34. Borland R, Yong HH, Wilson N, Fong GT, Hammond D, Cummings KM, et al. How  
26  
27 reactions to cigarette packet health warnings influence quitting: findings from the ITC Four-  
28  
29 Country survey. *Addiction*. 2009;104(4):669-75.
- 30  
31 35. Partos TR, Borland R, Yong HH, Thrasher J, Hammond D. Cigarette packet warning  
32  
33 labels can prevent relapse: findings from the International Tobacco Control 4-Country policy  
34  
35 evaluation cohort study. *Tob Control*. 2012.
- 36  
37 36. Yong HH, Borland R, Thrasher JF, Thompson ME, Nagelhout GE, Fong GT, et al.  
38  
39 Mediation Pathways of the Impact of Cigarette Warning Labels on Quit Attempts. *Health*  
40  
41 *Psychol*. 2014.
- 42  
43 37. Borland R, Wilson N, Fong GT, Hammond D, Cummings KM, Yong HH, et al.  
44  
45 Impact of graphic and text warnings on cigarette packs: findings from four countries over five  
46  
47 years. *Tob Control*. 2009;18(5):358-64.
- 48  
49 38. Maynard OM, Munafo MR, Leonards U. Visual attention to health warnings on plain  
50  
51 tobacco packaging in adolescent smokers and non-smokers. *Addiction*. 2013;108(2):413-9.
- 52  
53  
54  
55  
56  
57  
58  
59  
60

- 1  
2  
3 39. Munafo MR, Roberts N, Bauld L, Leonards U. Plain packaging increases visual  
4 attention to health warnings on cigarette packs in non-smokers and weekly smokers but not  
5 daily smokers. *Addiction*. 2011;106(8):1505-10.  
6  
7  
8  
9  
10 40. Goldberg ME, Kindra G, Lefebvre J, Tribu L, Liefeld J, Madill-Marshall J, et al.  
11 When packages can't speak: possible impacts of plain and generic packaging of tobacco  
12 products. Expert panel report prepared at the request of Health Canada, 1995 Contract No.:  
13 521716345/6771.  
14  
15  
16  
17  
18 41. Wakefield M. Welcome to cardboard country: how plain packaging could change the  
19 subjective experience of smoking. *Tob Control*. 2011;20(5):321-2.  
20  
21  
22  
23 42. Dunlevy S, Stark P. Plain packaging leaves bad taste in smokers' mouths. *Herald Sun*  
24 30 November 2012.  
25  
26  
27 43. Hagan K, Harrison D. Plain packs 'put off' smokers. *The Age* 30, November 2012.  
28  
29  
30 44. Hyland A, Borland R, Li Q, Yong HH, McNeill A, Fong GT, et al. Individual-level  
31 predictors of cessation behaviours among participants in the International Tobacco Control  
32 (ITC) Four Country Survey. *Tob Control*. 2006;15 Suppl 3:iii83-94.  
33  
34  
35  
36 45. Zacher M, Bayly M, Brennan E, Dono J, Miller C, Durkin S, et al. Personal tobacco  
37 pack display before and after the introduction of plain packaging with larger pictorial health  
38 warnings in Australia: an observational study of outdoor café strips. *Addiction*.  
39 2014;109(4):653-62.  
40  
41  
42  
43  
44  
45 46. Australian Communications and Media Authority (ACMA). Communications report  
46 2010-11 series: Report 2 - Converging communications channels: Preferences and behaviours  
47 of Australian communications users. ACMA, 2011.  
48  
49  
50  
51  
52 47. Barr ML, van Ritten JJ, Steel DG, Thackway SV. Inclusion of mobile phone numbers  
53 into an ongoing population health survey in New South Wales, Australia: design, methods,  
54 call outcomes, costs and sample representativeness. *BMC Med Res Methodol*. 2012;12:177.  
55  
56  
57  
58  
59  
60



- 1  
2  
3 48. Thompson ME, Fong GT, Hammond D, Boudreau C, Driezen P, Hyland A, et al.  
4  
5 Methods of the International Tobacco Control (ITC) Four Country Survey. Tob Control.  
6  
7 2006;15(Suppl 3):iii12-iii8.  
8  
9  
10 49. Wakefield M, Morley C, Horan JK, Cummings KM. The cigarette pack as image:  
11  
12 new evidence from tobacco industry documents. Tob Control. 2002;11(Suppl I):i73-i80.  
13  
14 50. Carter SM. The Australian cigarette brand as product, person, and symbol. Tob  
15  
16 Control. 2003;12 Suppl 3:iii79-86.  
17  
18  
19  
20  
21  
22  
23  
24  
25  
26  
27  
28  
29  
30  
31  
32  
33  
34  
35  
36  
37  
38  
39  
40  
41  
42  
43  
44  
45  
46  
47  
48  
49  
50  
51  
52  
53  
54  
55  
56  
57  
58  
59  
60

Table 1. Sample characteristics from the Cancer Institute's Tobacco Tracking Survey (CITTS) April 2006-May 2012 (smokers only;  $n=15,745$ )

|                                  | <i>N</i> | %  |
|----------------------------------|----------|----|
| <b>Sex:</b>                      |          |    |
| Female                           | 8298     | 50 |
| Male                             | 7503     | 50 |
| <b>Age:</b>                      |          |    |
| 18-29 yrs                        | 2405     | 21 |
| 30-55 yrs                        | 8470     | 48 |
| 55+ yrs                          | 4924     | 31 |
| <b>Socio-Economic Status</b>     |          |    |
| Low                              | 6577     | 41 |
| Mod                              | 4071     | 27 |
| High                             | 4974     | 33 |
| <b>Smoking Frequency</b>         |          |    |
| Daily                            | 14025    | 88 |
| Weekly                           | 950      | 6  |
| Less than weekly                 | 826      | 6  |
| <b>Smoking</b>                   |          |    |
| Low                              | 5827     | 41 |
| Mod                              | 5837     | 38 |
| High                             | 3473     | 22 |
| <b>Quit Attempts in Past 12m</b> |          |    |
| None                             | 9443     | 60 |
| At least one                     | 6145     | 40 |
| <b>Year:</b>                     |          |    |
| 2006                             | 1600     | 10 |
| 2007                             | 2289     | 15 |
| 2008                             | 2094     | 13 |
| 2009                             | 2135     | 14 |
| 2010                             | 2146     | 14 |
| 2011                             | 2157     | 14 |
| 2012                             | 2126     | 13 |
| 2013                             | 1254     | 8  |

Notes. *N*s are unweighted, %s are weighted for age, sex, and regional residence

Table 2. Results of interrupted time series analyses investigating the impact of new tobacco packaging on smokers' responses to graphic health warnings and pack attitudes

|                                                     |                                               | Increase in %<br>strongly agree<br>(95% CI)    | P      |
|-----------------------------------------------------|-----------------------------------------------|------------------------------------------------|--------|
| <b>Responses to<br/>graphic health<br/>warnings</b> | Cognitive <sup>a</sup>                        | 9.8 (3.0, 16.5)                                | 0.005  |
|                                                     | Emotional <sup>a</sup>                        | 8.6 (1.7, 15.4)                                | 0.010  |
|                                                     | Avoidant <sup>b</sup>                         | 9.8 (4.2, 15.3)                                | <0.001 |
|                                                     | Warning Salience <sup>c</sup>                 | 2.5 (-10.1, 15.1)                              | 0.700  |
|                                                     | <b>GHW Impact <sup>c</sup></b>                | <b>0.38 (0.05, 0.70) <sup>d</sup></b>          | 0.02   |
|                                                     |                                               | Increase in %<br>strongly disagree<br>(95% CI) |        |
| <b>Pack perceptions</b>                             | Attractive <sup>c</sup>                       | 57.5 (38.0, 77.1)                              | <0.001 |
|                                                     | Says something good about me <sup>c</sup>     | 54.5 (36.9, 72.1)                              | <0.001 |
|                                                     | Influences the brand I buy <sup>c</sup>       | 40.6 (23.2, 58.0)                              | <0.001 |
|                                                     | Makes my brand stand out <sup>c</sup>         | 55.6 (35.0, 76.2)                              | <0.001 |
|                                                     | Is fashionable <sup>c</sup>                   | 44.7 (28.1, 61.2)                              | <0.001 |
|                                                     | Matches my style <sup>c</sup>                 | 48.1 (32.2, 64.0)                              | <0.001 |
|                                                     | <b>Negative Pack Perceptions <sup>c</sup></b> | <b>0.21 (0.02, 0.40) <sup>d</sup></b>          | 0.03   |

Notes. All models adjusted for TARPs, cigarette costliness, and seasonal variations (where possible); full results available from authors on request; all effects occurred at 3-months lag, except for 'avoidant' responses to the graphic health warnings and GHW Impact (2-month lag); <sup>a</sup> Data available April 2006 – May 2013; <sup>b</sup> Data available April 2007 – May 2013; <sup>c</sup> Data available October 2011 – May 2013; <sup>d</sup> Increase in Mean score

Table 3. Results from linear regression models predicting Graphic Health Warning Impact and Negative Pack Perceptions from month of interview in the plain packaging and comparison periods

|                                  |               | Comparison period<br>(2011-2012) |        |         |          |      | Plain packaging period<br>(2012-2013) |        |        |         |          |       |        |
|----------------------------------|---------------|----------------------------------|--------|---------|----------|------|---------------------------------------|--------|--------|---------|----------|-------|--------|
|                                  |               | M                                | (SD)   | $\beta$ | 95% C.I. |      | p                                     | M      | (SD)   | $\beta$ | 95% C.I. |       | p      |
| <b>GHW Impact</b>                | <b>Month:</b> |                                  |        |         |          |      |                                       |        |        |         |          |       |        |
|                                  | Aug/Sept      | n/a                              |        |         |          |      | 2.67                                  | (0.93) | Ref    |         |          |       |        |
|                                  | Oct/Nov       | 2.57                             | (0.90) | Ref     |          |      | 2.75                                  | (0.97) | 0.00   | -0.16   | 0.18     | 0.932 |        |
|                                  | Dec/Jan       | 2.62                             | (0.99) | -0.01   | -0.25    | 0.21 | 0.847                                 | 2.88   | (1.16) | 0.09    | 0.07     | 0.46  | 0.008  |
|                                  | Feb/March     | 2.77                             | (0.89) | 0.10    | -0.19    | 0.58 | 0.323                                 | 2.75   | (1.15) | 0.07    | -0.04    | 0.39  | 0.110  |
|                                  | April/May     | 2.67                             | (0.96) | -0.01   | -0.52    | 0.48 | 0.930                                 | 2.85   | (1.21) | 0.06    | 0.01     | 0.34  | 0.043  |
| <b>Negative Pack Perceptions</b> | <b>Month:</b> |                                  |        |         |          |      |                                       |        |        |         |          |       |        |
|                                  | Aug/Sept      | n/a                              |        |         |          |      | 3.95                                  | (0.76) | Ref    |         |          |       |        |
|                                  | Oct/Nov       | 4.03                             | (0.60) | Ref     |          |      | 3.96                                  | (0.75) | 0.02   | -0.47   | 1.06     | 0.449 |        |
|                                  | Dec/Jan       | 4.11                             | (0.64) | 0.06    | -0.43    | 1.46 | 0.286                                 | 4.50   | (0.63) | 0.27    | 2.74     | 4.18  | <0.001 |
|                                  | Feb/March     | 4.08                             | (0.59) | 0.03    | -1.40    | 1.88 | 0.775                                 | 4.58   | (0.61) | 0.37    | 3.14     | 4.75  | <0.001 |
|                                  | April/May     | 4.03                             | (0.69) | 0.07    | -1.61    | 2.80 | 0.598                                 | 4.64   | (0.63) | 0.40    | 3.87     | 5.21  | <0.001 |

Notes. GHW=Graphic Health Warnings; M=Mean (range 1-5); SD=Standard Deviation;  $\beta$ =standardised coefficient; C.I.=95% Confidence Interval; models controlled for demographics (sex, age, SES), smoking characteristics (frequency and level of smoking, 12m quitting history), anti-smoking advertising activity (TARPs), and recent increases in cigarette costliness (% increase in past 12 weeks); M's and SD's are unweighted.

## STROBE Statement—checklist of items that should be included in reports of observational studies

|                              | Item No | Recommendation                                                                                                                                                                                                                                                                                                                                                                                                                                                         | Y/N |
|------------------------------|---------|------------------------------------------------------------------------------------------------------------------------------------------------------------------------------------------------------------------------------------------------------------------------------------------------------------------------------------------------------------------------------------------------------------------------------------------------------------------------|-----|
| <b>Title and abstract</b>    | 1       | (a) Indicate the study's design with a commonly used term in the title or the abstract                                                                                                                                                                                                                                                                                                                                                                                 | Y   |
|                              |         | (b) Provide in the abstract an informative and balanced summary of what was done and what was found                                                                                                                                                                                                                                                                                                                                                                    | Y   |
| <b>Introduction</b>          |         |                                                                                                                                                                                                                                                                                                                                                                                                                                                                        |     |
| Background/rationale         | 2       | Explain the scientific background and rationale for the investigation being reported                                                                                                                                                                                                                                                                                                                                                                                   | Y   |
| Objectives                   | 3       | State specific objectives, including any prespecified hypotheses                                                                                                                                                                                                                                                                                                                                                                                                       | Y   |
| <b>Methods</b>               |         |                                                                                                                                                                                                                                                                                                                                                                                                                                                                        |     |
| Study design                 | 4       | Present key elements of study design early in the paper                                                                                                                                                                                                                                                                                                                                                                                                                | Y   |
| Setting                      | 5       | Describe the setting, locations, and relevant dates, including periods of recruitment, exposure, follow-up, and data collection                                                                                                                                                                                                                                                                                                                                        | Y   |
| Participants                 | 6       | (a) <i>Cohort study</i> —Give the eligibility criteria, and the sources and methods of selection of participants. Describe methods of follow-up<br><i>Case-control study</i> —Give the eligibility criteria, and the sources and methods of case ascertainment and control selection. Give the rationale for the choice of cases and controls<br><i>Cross-sectional study</i> —Give the eligibility criteria, and the sources and methods of selection of participants | Y   |
|                              |         | (b) <i>Cohort study</i> —For matched studies, give matching criteria and number of exposed and unexposed<br><i>Case-control study</i> —For matched studies, give matching criteria and the number of controls per case                                                                                                                                                                                                                                                 |     |
| Variables                    | 7       | Clearly define all outcomes, exposures, predictors, potential confounders, and effect modifiers. Give diagnostic criteria, if applicable                                                                                                                                                                                                                                                                                                                               | Y   |
| Data sources/<br>measurement | 8*      | For each variable of interest, give sources of data and details of methods of assessment (measurement). Describe comparability of assessment methods if there is more than one group                                                                                                                                                                                                                                                                                   | Y   |
| Bias                         | 9       | Describe any efforts to address potential sources of bias                                                                                                                                                                                                                                                                                                                                                                                                              | Y   |
| Study size                   | 10      | Explain how the study size was arrived at                                                                                                                                                                                                                                                                                                                                                                                                                              | Y   |
| Quantitative variables       | 11      | Explain how quantitative variables were handled in the analyses. If applicable, describe which groupings were chosen and why                                                                                                                                                                                                                                                                                                                                           | Y   |
| Statistical methods          | 12      | (a) Describe all statistical methods, including those used to control for confounding                                                                                                                                                                                                                                                                                                                                                                                  | Y   |
|                              |         | (b) Describe any methods used to examine subgroups and interactions                                                                                                                                                                                                                                                                                                                                                                                                    | Y   |
|                              |         | (c) Explain how missing data were addressed                                                                                                                                                                                                                                                                                                                                                                                                                            | Y   |
|                              |         | (d) <i>Cohort study</i> —If applicable, explain how loss to follow-up was addressed<br><i>Case-control study</i> —If applicable, explain how matching of cases and controls was addressed<br><i>Cross-sectional study</i> —If applicable, describe analytical methods taking account of sampling strategy                                                                                                                                                              | Y   |
|                              |         | (e) Describe any sensitivity analyses                                                                                                                                                                                                                                                                                                                                                                                                                                  |     |

Continued on next page

| <b>Results</b>           |     |                                                                                                                                                                                                                                                                                                                                                                                                               |   |
|--------------------------|-----|---------------------------------------------------------------------------------------------------------------------------------------------------------------------------------------------------------------------------------------------------------------------------------------------------------------------------------------------------------------------------------------------------------------|---|
| Participants             | 13* | (a) Report numbers of individuals at each stage of study—eg numbers potentially eligible, examined for eligibility, confirmed eligible, included in the study, completing follow-up, and analysed<br>(b) Give reasons for non-participation at each stage<br>(c) Consider use of a flow diagram                                                                                                               | Y |
| Descriptive data         | 14* | (a) Give characteristics of study participants (eg demographic, clinical, social) and information on exposures and potential confounders<br>(b) Indicate number of participants with missing data for each variable of interest<br>(c) <i>Cohort study</i> —Summarise follow-up time (eg, average and total amount)                                                                                           | Y |
| Outcome data             | 15* | <i>Cohort study</i> —Report numbers of outcome events or summary measures over time<br><i>Case-control study</i> —Report numbers in each exposure category, or summary measures of exposure<br><i>Cross-sectional study</i> —Report numbers of outcome events or summary measures                                                                                                                             | Y |
| Main results             | 16  | (a) Give unadjusted estimates and, if applicable, confounder-adjusted estimates and their precision (eg, 95% confidence interval). Make clear which confounders were adjusted for and why they were included<br>(b) Report category boundaries when continuous variables were categorized<br>(c) If relevant, consider translating estimates of relative risk into absolute risk for a meaningful time period | Y |
| Other analyses           | 17  | Report other analyses done—eg analyses of subgroups and interactions, and sensitivity analyses                                                                                                                                                                                                                                                                                                                |   |
| <b>Discussion</b>        |     |                                                                                                                                                                                                                                                                                                                                                                                                               |   |
| Key results              | 18  | Summarise key results with reference to study objectives                                                                                                                                                                                                                                                                                                                                                      | Y |
| Limitations              | 19  | Discuss limitations of the study, taking into account sources of potential bias or imprecision. Discuss both direction and magnitude of any potential bias                                                                                                                                                                                                                                                    | Y |
| Interpretation           | 20  | Give a cautious overall interpretation of results considering objectives, limitations, multiplicity of analyses, results from similar studies, and other relevant evidence                                                                                                                                                                                                                                    | Y |
| Generalisability         | 21  | Discuss the generalisability (external validity) of the study results                                                                                                                                                                                                                                                                                                                                         | Y |
| <b>Other information</b> |     |                                                                                                                                                                                                                                                                                                                                                                                                               |   |
| Funding                  | 22  | Give the source of funding and the role of the funders for the present study and, if applicable, for the original study on which the present article is based                                                                                                                                                                                                                                                 | Y |

\*Give information separately for cases and controls in case-control studies and, if applicable, for exposed and unexposed groups in cohort and cross-sectional studies.

**Note:** An Explanation and Elaboration article discusses each checklist item and gives methodological background and published examples of transparent reporting. The STROBE checklist is best used in conjunction with this article (freely available on the Web sites of PLoS Medicine at <http://www.plosmedicine.org/>, Annals of Internal Medicine at <http://www.annals.org/>, and Epidemiology at <http://www.epidem.com/>). Information on the STROBE Initiative is available at [www.strobe-statement.org](http://www.strobe-statement.org).
