# Supplementary material for: Impact of Australia's introduction of tobacco plain packs on adult smokers’ pack-related perceptions and responses: results from a continuous tracking survey
Source: HighWire-hosted journal article supplement (doi:10.1136/bmjopen-2014-005836), 2014-12-01

# Supplementary Figures

## Supplementary Figure 1:

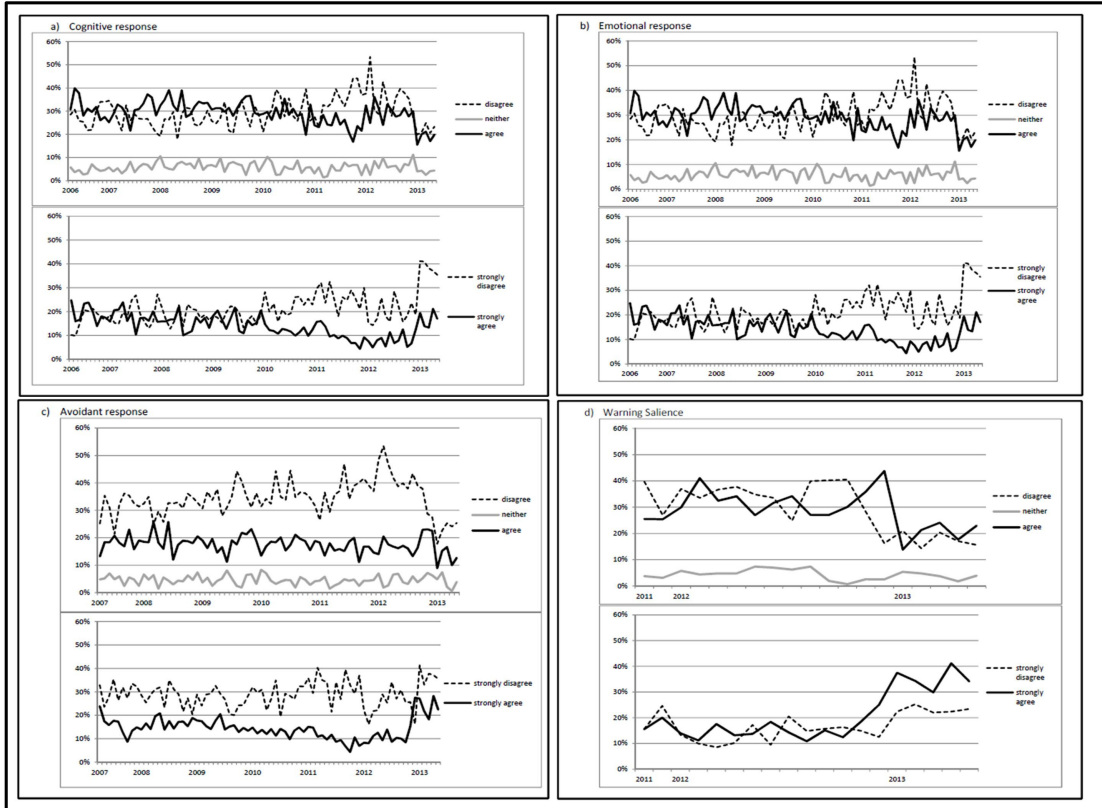

Supplementary Figure 2:

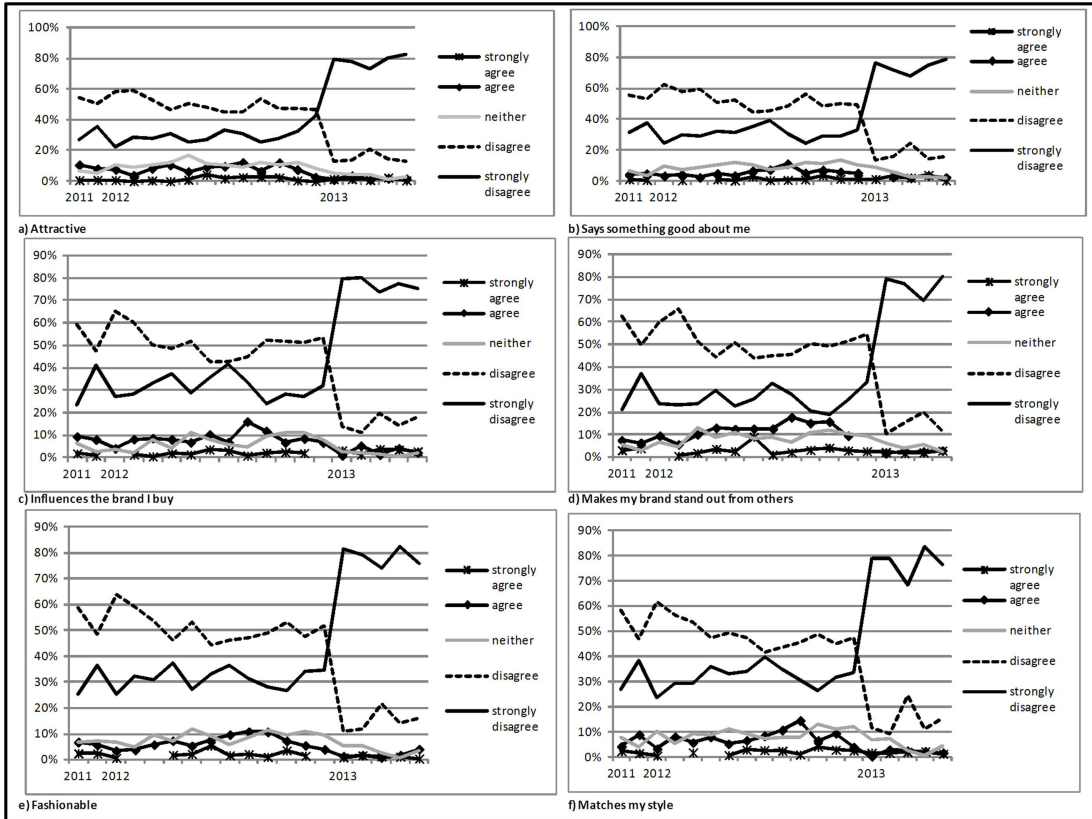

Supplement: bmjopen-2014-005836supp.pdf [file bmjopen-2014-005836supp.pdf]
